# Supplementary material
Source: publisher site journal article supplement (https://www.spandidos-publications.com/162/downloadSupplementary)
Supplement: Supplementary file 1 [file downloadSupplementary]

Figure S1. Top enriched KEGG pathways and GO annotations of the 15 hub genes. (A) Top enriched GO terms of hub genes classified into 'MF' 'CC' or 'BP' groups. (B) Top enriched KEGG pathways for 15 hub genes. MF, molecular function; BP, biological process; CC, cellular component; Fox O, forkhead box protein O; p53, cellular tumor antigen p53.

A

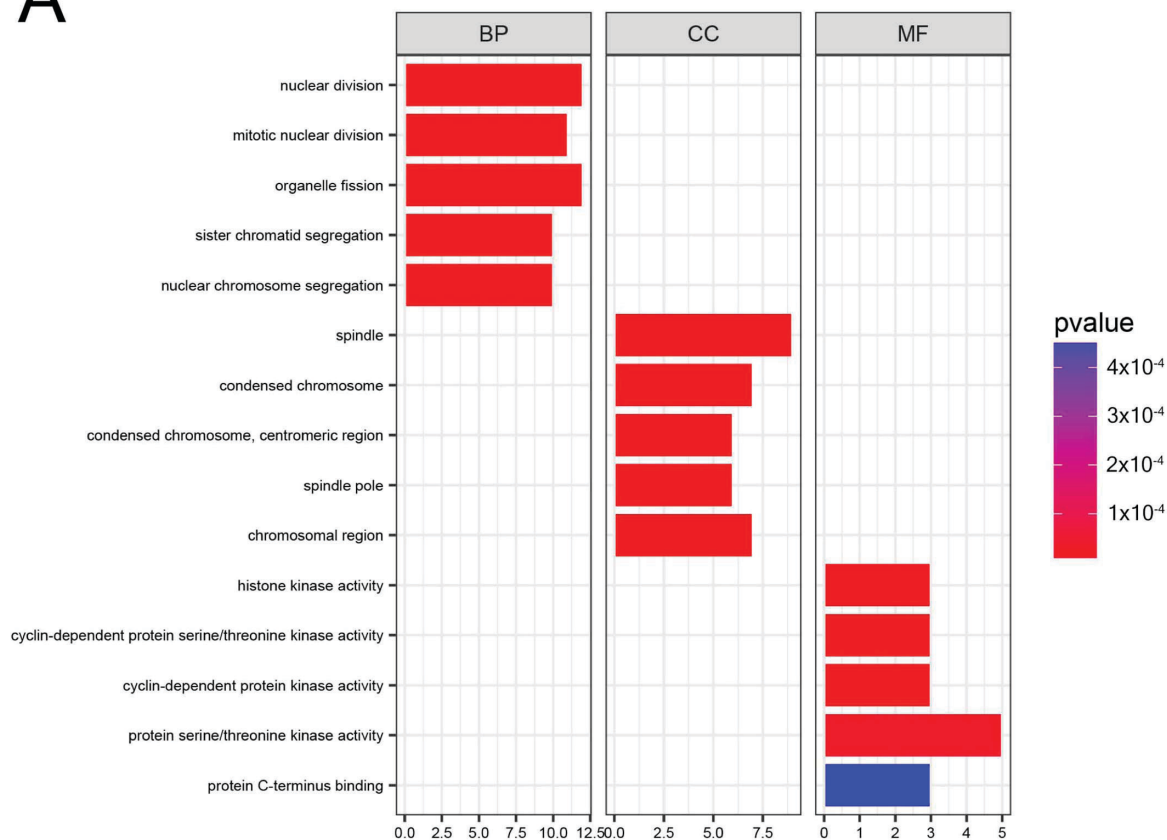

B

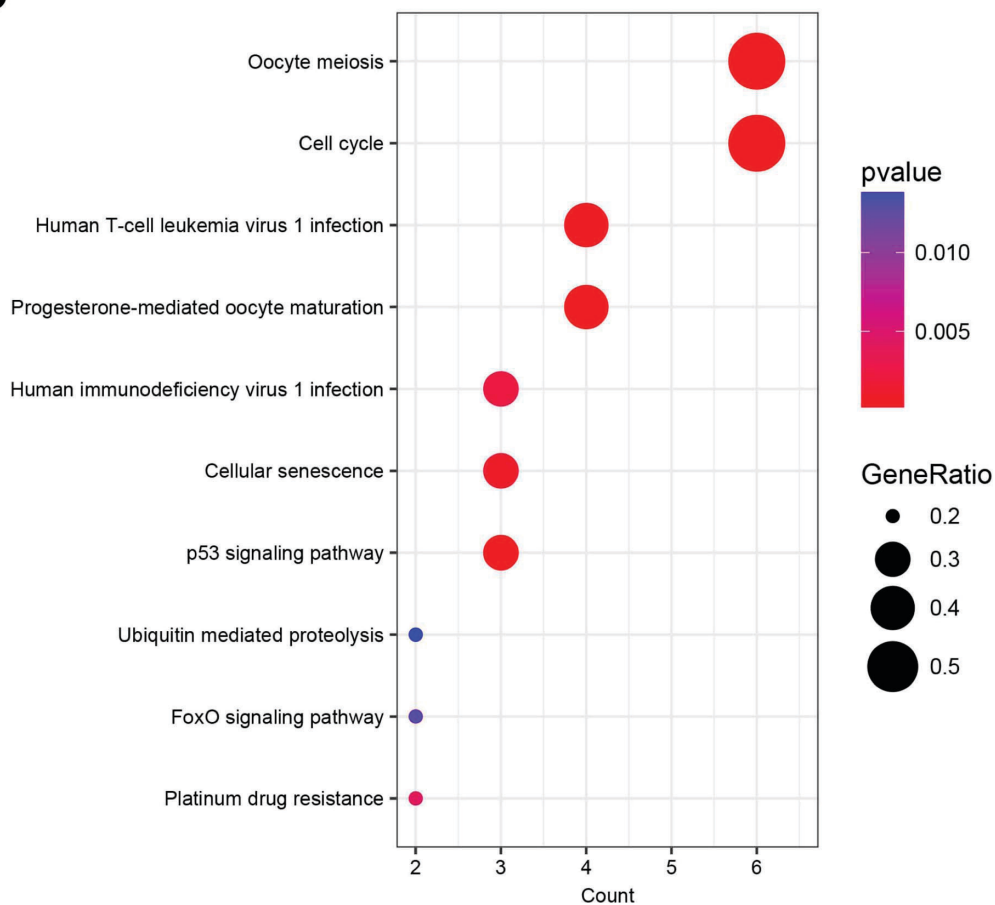

Table SI. All 322 consistently DEGs identified from the two datasets (GSE10810 and GSE65194).

| Probes       | Gene                    | GSE10810 (logFC) | GSE65194 (logFC) |
|--------------|-------------------------|------------------|------------------|
| 37892_at     | COL11A1                 | 4.974342423      | 7.614150589      |
| 217428_s_at  | COL10A1                 | 4.773855519      | 5.941510835      |
| 204320_at    | COL11A1                 | 4.308199243      | 7.041689833      |
| 205941_s_at  | COL10A1                 | 4.179797824      | 7.185323901      |
| 202503_s_at  | KIAA0101                | 3.656873558      | 6.300096327      |
| 201291_s_at  | TOP2A                   | 3.579629781      | 6.563078703      |
| 204351_at    | S100P                   | 3.528165339      | 6.620896592      |
| 223278_at    | GJB2                    | 3.463876610      | 5.270010001      |
| 227140_at    | INHBA                   | 3.451552990      | 4.112209403      |
| 229479_at    | LINC01614 <sup>a</sup>  | 3.320006011      | 4.030568064      |
| 209773_s_at  | RRM2                    | 3.288977815      | 6.845203487      |
| 201890_at    | RRM2                    | 3.261933149      | 5.506229608      |
| 229802_at    | WISP1                   | 3.255268910      | 4.380116263      |
| 201292_at    | TOP2A                   | 3.153355204      | 5.687091335      |
| 218039_at    | NUSAP1                  | 3.082037345      | 5.544430137      |
| 210387_at    | HIST1H2BG /// HIST1H2BJ | 3.019688558      | 5.082997094      |
| 204170_s_at  | CKS2                    | 2.948693231      | 4.803680413      |
| 219918_s_at  | ASPM                    | 2.840145269      | 5.297455226      |
| 219148_at    | PBK                     | 2.783093092      | 4.340917377      |
| 219978_s_at  | NUSAP1                  | 2.760984046      | 4.404392176      |
| 210511_s_at  | INHBA                   | 2.690719908      | 5.850674155      |
| 1555758_a_at | CDKN3                   | 2.659767213      | 4.585694779      |
| 213909_at    | LRRC15                  | 2.655835957      | 4.021573661      |
| 210559_s_at  | CDK1                    | 2.649726223      | 5.229573252      |
| 222608_s_at  | ANLN                    | 2.621450473      | 4.523675580      |
| 218585_s_at  | DTL                     | 2.618825285      | 4.457637444      |
| 225846_at    | ESRP1                   | 2.607897703      | 2.423440498      |
| 203213_at    | CDK1                    | 2.577853776      | 4.467616589      |
| 209875_s_at  | SPP1                    | 2.572173330      | 4.718015129      |
| 204026_s_at  | ZWINT                   | 2.556868006      | 5.035521021      |
| 225655_at    | UHRF1                   | 2.551066706      | 4.008772296      |
| 209714_s_at  | CDKN3                   | 2.545705544      | 4.813957188      |
| 202954_at    | UBE2C                   | 2.502298374      | 5.494603001      |
| 209218_at    | SQLE                    | 2.498849680      | 4.625250079      |
| 202705_at    | CCNB2                   | 2.480149778      | 4.800353277      |
| 219121_s_at  | ESRP1                   | 2.477793376      | 5.784980529      |
| 204533_at    | CXCL10                  | 2.463180558      | 6.775683120      |
| 214710_s_at  | CCNB1                   | 2.448807881      | 5.151028526      |
| 209911_x_at  | HIST1H2BD               | 2.433608005      | 3.722736165      |
| 201689_s_at  | TPD52                   | 2.381712030      | 4.599271901      |
| 223229_at    | UBE2T                   | 2.378439540      | 5.562611789      |
| 203953_s_at  | CLDN3                   | 2.376431419      | 4.277058138      |
| 210052_s_at  | TPX2                    | 2.373288114      | 5.197814569      |
| 201287_s_at  | SDC1                    | 2.358540629      | 3.089026718      |
| 207828_s_at  | CENPF                   | 2.354480040      | 5.182072102      |
| 202095_s_at  | BIRC5                   | 2.336609805      | 4.893001468      |
| 218883_s_at  | CENPU                   | 2.320651087      | 4.781702313      |
| 206102_at    | GINS1                   | 2.309766155      | 3.124930577      |
| 203755_at    | BUB1B                   | 2.306163565      | 4.039844004      |
| 218009_s_at  | PRC1                    | 2.276127707      | 5.680940136      |
| 203214_x_at  | CDK1                    | 2.262064590      | 4.970478235      |
| 203554_x_at  | PTTG1                   | 2.247389830      | 3.555885667      |
| 201688_s_at  | TPD52                   | 2.240743605      | 6.412326434      |
| 201690_s_at  | TPD52                   | 2.217144213      | 2.480276525      |
| 217755_at    | HN1                     | 2.209183178      | 3.663179120      |
| 203362_s_at  | MAD2L1                  | 2.194761694      | 4.686019754      |
| 203878_s_at  | MMP11                   | 2.181518957      | 5.662552219      |
| 208079_s_at  | AURKA                   | 2.161159717      | 4.254107948      |
| 1554408_a_at | TK1                     | 2.150764231      | 4.166654569      |

Table SI. Continued.

| Probes       | Gene                                                  | GSE10810 (logFC) | GSE65194 (logFC) |
|--------------|-------------------------------------------------------|------------------|------------------|
| 204825_at    | MELK                                                  | 2.149856729      | 4.612823823      |
| 202870_s_at  | CDC20                                                 | 2.132407137      | 5.311440062      |
| 215779_s_at  | HIST1H2BG /// HIST1H2BJ                               | 2.130299619      | 3.779879678      |
| 214290_s_at  | HIST2H2AA3 /// HIST2H2AA4                             | 2.126507280      | 4.053592462      |
| 203744_at    | HMGB3                                                 | 2.119778937      | 2.523832383      |
| 202589_at    | TYMS                                                  | 2.107418588      | 4.062527017      |
| 222067_x_at  | HIST1H2BD                                             | 2.082701983      | 3.181806807      |
| 203108_at    | GPRC5A                                                | 2.075098264      | 4.886108396      |
| 1555778_a_at | POSTN                                                 | 2.066881245      | 4.584360248      |
| 203876_s_at  | MMP11                                                 | 2.007240927      | 4.527117235      |
| 222043_at    | CLU                                                   | -2.002360210     | -3.421393152     |
| 209047_at    | AQP1                                                  | -2.005078788     | -3.021412614     |
| 204115_at    | GNG11                                                 | -2.007884558     | -2.625834639     |
| 205384_at    | FXYD1                                                 | -2.022002451     | -4.526599272     |
| 229310_at    | KLHL29                                                | -2.026718071     | -3.556121626     |
| 218651_s_at  | LARP6                                                 | -2.036982933     | -2.149454961     |
| 209540_at    | IGF1                                                  | -2.074562105     | -4.706133092     |
| 227190_at    | TMEM37                                                | -2.085398112     | -2.779583059     |
| 1556579_s_at | IGSF10                                                | -2.088223909     | -3.034559530     |
| 213029_at    | NFIB                                                  | -2.088285607     | -2.646606477     |
| 220276_at    | RERGL                                                 | -2.090567689     | -2.943609988     |
| 227148_at    | PLEKHH2                                               | -2.091278879     | -2.871896401     |
| 232812_at    | LOC401052                                             | -2.092667067     | -2.538597677     |
| 217546_at    | MT1M                                                  | -2.094752204     | -2.119095496     |
| 1558420_at   | C14orf180                                             | -2.103755684     | -2.269644432     |
| 213924_at    | GNAL                                                  | -2.109931985     | -3.412009996     |
| 200696_s_at  | GSN                                                   | -2.114826881     | -2.181956111     |
| 202796_at    | SYNPO                                                 | -2.115326499     | -2.129939024     |
| 223430_at    | SIK2                                                  | -2.120785837     | -2.559206563     |
| 220061_at    | ACSM5                                                 | -2.123346714     | -3.447107252     |
| 203766_s_at  | LMOD1                                                 | -2.128892294     | -4.333272898     |
| 230360_at    | GLDN                                                  | -2.150200793     | -2.304156622     |
| 219091_s_at  | MMRN2                                                 | -2.151356281     | -2.205550194     |
| 213183_s_at  | CDKN1C <sup>a</sup>                                   | -2.155085916     | -3.984231381     |
| 225720_at    | SYNPO2                                                | -2.159095975     | -3.350998399     |
| 230670_at    | IGSF10                                                | -2.164693938     | -2.251737180     |
| 225016_at    | APCDD1                                                | -2.165878759     | -3.001146911     |
| 235570_at    | RBMS3                                                 | -2.169284206     | -3.893271123     |
| 213661_at    | PAMR1                                                 | -2.172636137     | -4.236560629     |
| 229127_at    | JAM2                                                  | -2.200192592     | -2.835944480     |
| 1558421_a_at | C14orf180                                             | -2.205082867     | -3.322302639     |
| 238009_at    | SOX5                                                  | -2.206490422     | -2.051109314     |
| 1560049_at   | Transcribed locus <sup>a</sup>                        | -2.210569419     | -3.307239101     |
| 227874_at    | EMCN                                                  | -2.215879505     | -2.923638758     |
| 230867_at    | COL6A6                                                | -2.224231302     | -5.379551620     |
| 230595_at    | PGM5-AS1                                              | -2.242756708     | -3.675895518     |
| 206481_s_at  | LDB2                                                  | -2.245887178     | -3.190397758     |
| 224964_s_at  | GNG2                                                  | -2.252964674     | -2.551552310     |
| 230463_at    | CDNA FLJ36891 fis,<br>clone BRACE2000368 <sup>a</sup> | -2.255231676     | -2.100203735     |
| 228770_at    | GPR146                                                | -2.256247188     | -3.532710064     |
| 204273_at    | EDNRB                                                 | -2.262439055     | -3.496582832     |
| 228186_s_at  | RSPO3                                                 | -2.267103767     | -3.777335269     |
| 89977_at     | ACSM5                                                 | -2.269116844     | -2.622603929     |
| 243879_at    | 243879_at                                             | -2.275011638     | -2.308859983     |
| 229308_at    | ANKRD29                                               | -2.276228047     | -3.006780343     |
| 219093_at    | PID1                                                  | -2.277811699     | -3.355643920     |
| 238062_at    | GPIHBP1                                               | -2.280898510     | -4.521503163     |
| 203295_s_at  | ATP1A2                                                | -2.281590506     | -2.143266911     |

Table SI. Continued.

| Probes       | Gene                                                  | GSE10810 (logFC) | GSE65194 (logFC) |
|--------------|-------------------------------------------------------|------------------|------------------|
| 220751_s_at  | FAXDC2                                                | -2.282030391     | -3.206127356     |
| 228771_at    | ADRBK2                                                | -2.287375295     | -2.692943875     |
| 229985_at    | BTNL9                                                 | -2.305582620     | -5.532799952     |
| 204570_at    | COX7A1                                                | -2.322033287     | -3.660899221     |
| 238066_at    | RBP7                                                  | -2.345337612     | -4.813114448     |
| 213844_at    | HOXA5                                                 | -2.348751405     | -5.257729568     |
| 231773_at    | ANGPTL1                                               | -2.349733358     | -2.783925287     |
| 211340_s_at  | MCAM /// MIR6756                                      | -2.351350553     | -2.111733187     |
| 225571_at    | LIFR                                                  | -2.351770387     | -3.171263692     |
| 208335_s_at  | ACKR1                                                 | -2.368155378     | -4.652636844     |
| 209392_at    | ENPP2                                                 | -2.377914700     | -3.218217380     |
| 212701_at    | TLN2                                                  | -2.386434196     | -2.245128109     |
| 205619_s_at  | MEOX1                                                 | -2.386944727     | -3.300215057     |
| 236262_at    | MMRN2                                                 | -2.399527407     | -3.380475114     |
| 228501_at    | GALNT15                                               | -2.409225746     | -2.043302554     |
| 238003_at    | HEPACAM /// HEPN1                                     | -2.409738608     | -3.061120936     |
| 205208_at    | ALDH1L1                                               | -2.410742351     | -2.157322745     |
| 202112_at    | VWF                                                   | -2.412380520     | -3.084231882     |
| 236359_at    | SCN4B                                                 | -2.429149561     | -4.821951844     |
| 32625_at     | NPR1                                                  | -2.430244616     | -4.318878980     |
| 226303_at    | PGM5                                                  | -2.434124475     | -3.382091862     |
| 218665_at    | FZD4                                                  | -2.436835989     | -2.574185438     |
| 1552616_a_at | ACACB                                                 | -2.436941905     | -2.090919511     |
| 202746_at    | ITM2A                                                 | -2.454627819     | -3.410685980     |
| 225627_s_at  | CACHD1                                                | -2.456744829     | -3.209532502     |
| 220868_s_at  | SLC7A10                                               | -2.457111545     | -2.202331568     |
| 208186_s_at  | LIPE                                                  | -2.457847252     | -3.256467920     |
| 235368_at    | ADAMTS5                                               | -2.458996331     | -3.836188249     |
| 204134_at    | PDE2A                                                 | -2.478821615     | -3.309883582     |
| 227762_at    | ZBTB16 <sup>a</sup>                                   | -2.487917630     | -4.598801533     |
| 204755_x_at  | HLF                                                   | -2.509182595     | -2.795268111     |
| 225575_at    | LIFR                                                  | -2.512217829     | -3.223513608     |
| 239523_at    | TUSC5                                                 | -2.513331334     | -4.805124557     |
| 209074_s_at  | FAM107A                                               | -2.526008181     | -3.558223721     |
| 209087_x_at  | MCAM                                                  | -2.538003851     | -2.218638219     |
| 236038_at    | RNF150                                                | -2.538907954     | -3.659086399     |
| 226322_at    | TMTC1                                                 | -2.543077214     | -3.938075211     |
| 213317_at    | CLIC5                                                 | -2.558098203     | -2.102045110     |
| 217047_s_at  | FAM13A                                                | -2.559989286     | -2.144573396     |
| 228728_at    | CPED1                                                 | -2.564811000     | -3.095151961     |
| 242181_at    | CDNA FLJ33489 fis,<br>clone BRAMY2003585 <sup>a</sup> | -2.567599977     | -2.912753070     |
| 202920_at    | ANK2                                                  | -2.567801925     | -3.952200736     |
| 206955_at    | AQP7 /// LOC100509620 ///<br>LOC101930168             | -2.570987785     | -2.388774101     |
| 227006_at    | PPP1R14A                                              | -2.579312661     | -4.691365475     |
| 204754_at    | HLF                                                   | -2.579337475     | -4.028007801     |
| 232313_at    | TMEM132C                                              | -2.589480507     | -2.963168692     |
| 212097_at    | CAV1                                                  | -2.601784381     | -3.164337225     |
| 213348_at    | CDKN1C                                                | -2.607733865     | -3.832289535     |
| 205883_at    | ZBTB16                                                | -2.610330524     | -4.655759059     |
| 204753_s_at  | HLF                                                   | -2.611045178     | -2.809119047     |
| 1558828_s_at | MIR143HG                                              | -2.619913251     | -3.388882927     |
| 204955_at    | SRPX                                                  | -2.623527381     | -3.608737002     |
| 208609_s_at  | TNXA /// TNXB                                         | -2.624197988     | -4.838112896     |
| 202973_x_at  | FAM13A                                                | -2.635543600     | -2.145920688     |
| 223828_s_at  | LGALS12                                               | -2.678595360     | -2.962115576     |
| 203435_s_at  | MME                                                   | -2.679237652     | -3.753758745     |
| 226625_at    | TGFBR3                                                | -2.680718639     | -4.424851477     |

Table SI. Continued.

| Probes       | Gene                           | GSE10810 (logFC) | GSE65194 (logFC) |
|--------------|--------------------------------|------------------|------------------|
| 221928_at    | ACACB                          | -2.684606017     | -4.841202686     |
| 222351_at    | PPP2R1B                        | -2.689374819     | -2.971627825     |
| 227419_x_at  | PLAC9                          | -2.690062017     | -4.944166957     |
| 222083_at    | GLYAT                          | -2.704775531     | -2.249311452     |
| 204731_at    | TGFBR3                         | -2.709240049     | -4.903330506     |
| 203065_s_at  | CAV1                           | -2.712575681     | -2.674542256     |
| 205392_s_at  | CCL14 /// CCL15-CCL14          | -2.714057719     | -4.816936452     |
| 1556427_s_at | LRRN4CL                        | -2.743425540     | -4.571947596     |
| 203851_at    | IGFBP6                         | -2.748982232     | -4.002097700     |
| 235129_at    | PPP1R1A                        | -2.752864876     | -2.315320510     |
| 223316_at    | CCDC3                          | -2.756428134     | -2.822961778     |
| 219563_at    | LINC00341 /// SYNE3            | -2.791969387     | -2.957273180     |
| 239398_at    | KLHL31                         | -2.792499775     | -2.145758536     |
| 211726_s_at  | FMO2                           | -2.807905372     | -4.417549871     |
| 212886_at    | CCDC69                         | -2.824129494     | -3.702042384     |
| 213247_at    | SVEP1                          | -2.830549747     | -2.722582673     |
| 229011_at    | EMP1                           | -2.832137121     | -2.253859061     |
| 209663_s_at  | ITGA7                          | -2.839008082     | -2.681996267     |
| 210517_s_at  | AKAP12                         | -2.839060191     | -2.966781284     |
| 228335_at    | CLDN11                         | -2.839303370     | -4.310450292     |
| 221748_s_at  | TNS1                           | -2.870172700     | -3.711485207     |
| 1553102_a_at | CCDC69                         | -2.884792929     | -2.278092505     |
| 227530_at    | AKAP12                         | -2.886505516     | -3.679054807     |
| 243311_at    | DEFB132                        | -2.901938132     | -2.016854944     |
| 203434_s_at  | MME                            | -2.916966495     | -3.401438335     |
| 216331_at    | ITGA7                          | -2.923689517     | -3.965646664     |
| 206093_x_at  | TNXA /// TNXB                  | -2.930429513     | -7.011386802     |
| 210106_at    | BLOC1S1-RDH5 /// RDH5          | -2.945220316     | -2.615273512     |
| 219689_at    | SEMA3G                         | -2.947173228     | -4.750160244     |
| 219935_at    | ADAMTS5                        | -2.948787161     | -4.886586216     |
| 229357_at    | ADAMTS5                        | -2.956692146     | -4.223573564     |
| 237154_at    | LOC101930114                   | -2.961064865     | -3.542087524     |
| 206262_at    | ADH1C                          | -2.979419830     | -3.310394632     |
| 202350_s_at  | LOC100506558 /// MATN2         | -2.986027169     | -4.657379995     |
| 215918_s_at  | SPTBN1                         | -2.996216462     | -3.044536327     |
| 209894_at    | LEPR /// LEPROT                | -3.006392890     | -3.985108007     |
| 226304_at    | HSPB6                          | -3.008025622     | -2.697256765     |
| 203881_s_at  | DMD                            | -3.014213007     | -3.482157633     |
| 216594_x_at  | AKR1C1                         | -3.014936792     | -3.382848273     |
| 228568_at    | MYZAP                          | -3.015570001     | -3.000834175     |
| 213486_at    | COPG2IT1                       | -3.028938344     | -4.277230763     |
| 230003_at    | SLC16A7                        | -3.050245319     | -3.477977213     |
| 225207_at    | PDK4                           | -3.060328915     | -4.561108902     |
| 208510_s_at  | PPARG                          | -3.064310576     | -2.931269626     |
| 237351_at    | LOC284825                      | -3.097083907     | -2.272274961     |
| 221747_at    | TNS1                           | -3.099160664     | -3.370137671     |
| 222513_s_at  | SORBS1                         | -3.113802490     | -2.978822380     |
| 232204_at    | EBF1                           | -3.116423285     | -2.827905238     |
| 212730_at    | SYNM                           | -3.117618935     | -4.465879026     |
| 223623_at    | C2orf40                        | -3.118539164     | -6.648498668     |
| 216333_x_at  | TNXA /// TNXB                  | -3.135446045     | -7.097391190     |
| 214456_x_at  | SAA1 /// SAA2                  | -3.144872249     | -4.127702032     |
| 1553243_at   | ITIH5                          | -3.147392457     | -3.604131283     |
| 211653_x_at  | AKR1C2 /// LOC101930400        | -3.150152707     | -3.436010455     |
| 201540_at    | FHL1                           | -3.161382126     | -4.279881447     |
| 204389_at    | MAOA                           | -3.167668137     | -3.403891997     |
| 213451_x_at  | TNXA /// TNXB                  | -3.195932647     | -6.739511165     |
| 211696_x_at  | HBB                            | -3.214007250     | -4.043684132     |
| 243584_at    | Transcribed locus <sup>a</sup> | -3.217046549     | -2.560226874     |

Table SI. Continued.

| Probes       | Gene                           | GSE10810 (logFC) | GSE65194 (logFC) |
|--------------|--------------------------------|------------------|------------------|
| 204018_x_at  | HBA1 /// HBA2                  | -3.221650355     | -3.735137936     |
| 1554044_a_at | MRAP                           | -3.237977997     | -2.735886333     |
| 206201_s_at  | MEOX2                          | -3.249245689     | -3.529974107     |
| 209220_at    | GPC3                           | -3.262212225     | -3.351272818     |
| 217414_x_at  | HBA1 /// HBA2                  | -3.264181953     | -4.022357154     |
| 213071_at    | DPT                            | -3.266070856     | -4.075799240     |
| 221795_at    | NTRK2                          | -3.272585136     | -5.512703757     |
| 214414_x_at  | HBA1 /// HBA2                  | -3.273817762     | -4.389416584     |
| 204151_x_at  | AKR1C1                         | -3.298727719     | -4.606898137     |
| 211745_x_at  | HBA1 /// HBA2                  | -3.299939391     | -4.081611317     |
| 1563182_at   | ACVR1C                         | -3.311486525     | -2.908677984     |
| 215695_s_at  | GYG2                           | -3.322763374     | -4.610059014     |
| 209458_x_at  | HBA1 /// HBA2                  | -3.324388463     | -4.196330636     |
| 219230_at    | TMEM100                        | -3.330730071     | -3.870583896     |
| 226018_at    | MTURN                          | -3.342077466     | -2.327864984     |
| 219064_at    | ITIH5                          | -3.359137763     | -5.413908652     |
| 217232_x_at  | HBB                            | -3.368829995     | -4.204253432     |
| 214063_s_at  | TF                             | -3.370960230     | -4.770999615     |
| 204894_s_at  | AOC3                           | -3.382115562     | -4.637223682     |
| 227646_at    | EBF1                           | -3.392366666     | -4.365730913     |
| 229487_at    | EBF1                           | -3.409781685     | -3.347936092     |
| 211699_x_at  | HBA1 /// HBA2                  | -3.419376368     | -3.906501281     |
| 208607_s_at  | SAA1 /// SAA2 /// SAA2-SAA4    | -3.422929113     | -5.074691794     |
| 209686_at    | S100B                          | -3.426783757     | -4.734080185     |
| 233011_at    | ANXA1                          | -3.440594642     | -2.788065057     |
| 223727_at    | KCNIP2                         | -3.440622407     | -3.702146629     |
| 209116_x_at  | HBB                            | -3.453556408     | -4.158920068     |
| 43427_at     | ACACB                          | -3.478526271     | -6.138701502     |
| 228885_at    | MAMDC2                         | -3.481568781     | -3.569286688     |
| 204154_at    | CDO1                           | -3.485514332     | -3.603626411     |
| 209614_at    | ADH1B                          | -3.495680583     | -3.439067402     |
| 228854_at    | Transcribed locus <sup>a</sup> | -3.501613004     | -6.144374439     |
| 206209_s_at  | CA4                            | -3.508801870     | -4.523175570     |
| 209699_x_at  | AKR1C2 /// LOC101930400        | -3.520383149     | -4.563661192     |
| 206488_s_at  | CD36                           | -3.525327939     | -5.160139443     |
| 222317_at    | PDE3B                          | -3.540705987     | -2.295386035     |
| 204388_s_at  | MAOA                           | -3.553068387     | -3.753130991     |
| 205498_at    | GHR                            | -3.558989802     | -4.266970904     |
| 205200_at    | CLEC3B /// EXOSC7              | -3.573197601     | -5.468721077     |
| 227529_s_at  | AKAP12                         | -3.589130195     | -2.112703330     |
| 235849_at    | SCARA5                         | -3.591373758     | -6.281774905     |
| 205382_s_at  | CFD                            | -3.604630501     | -5.914991376     |
| 218934_s_at  | HSPB7                          | -3.606294169     | -2.823333249     |
| 203296_s_at  | ATP1A2                         | -3.617931274     | -5.028105164     |
| 228434_at    | BTNL9                          | -3.627326240     | -5.082740403     |
| 212741_at    | MAOA                           | -3.636963950     | -4.741116592     |
| 225420_at    | GPAM                           | -3.639660491     | -3.088257137     |
| 209616_s_at  | CES1 /// LOC100653057          | -3.641782869     | -4.078328357     |
| 204997_at    | GPD1                           | -3.644642644     | -3.978049202     |
| 220065_at    | TNMD                           | -3.655414730     | -2.932995517     |
| 209555_s_at  | CD36                           | -3.674727963     | -5.179669067     |
| 239345_at    | SLC19A3                        | -3.697846156     | -2.187020487     |
| 49452_at     | ACACB                          | -3.700464787     | -6.863100007     |
| 229476_s_at  | THRSP                          | -3.729851781     | -4.815968225     |
| 244276_at    | KLB                            | -3.732966653     | -3.104339854     |
| 221295_at    | CIDEA                          | -3.735226209     | -3.239429215     |
| 203980_at    | FABP4                          | -3.752179598     | -7.571653296     |
| 213524_s_at  | G0S2                           | -3.862675132     | -4.739881759     |
| 222717_at    | SDPR                           | -3.930055641     | -4.913899484     |

Table SI. Continued.

| Probes       | Gene                           | GSE10810 (logFC) | GSE65194 (logFC) |
|--------------|--------------------------------|------------------|------------------|
| 1552509_a_at | CD300LG                        | -3.947713328     | -5.713854067     |
| 218087_s_at  | SORBS1                         | -3.953707256     | -4.444915890     |
| 203549_s_at  | LPL                            | -3.959101284     | -5.702206589     |
| 239262_at    | Transcribed locus <sup>a</sup> | -3.972403995     | -4.792597953     |
| 210964_s_at  | GYG2                           | -3.983526291     | -3.386350064     |
| 228766_at    | CD36                           | -3.989979254     | -6.445012246     |
| 206742_at    | FIGF /// PIR-FIGF              | -4.065619017     | -5.142647942     |
| 205478_at    | PPP1R1A                        | -4.079040451     | -4.322944467     |
| 206243_at    | TIMP4                          | -4.115916422     | -5.371772388     |
| 213706_at    | GPD1                           | -4.163817187     | -5.736438044     |
| 221796_at    | NTRK2                          | -4.165863348     | -5.115107252     |
| 219398_at    | CIDEC                          | -4.185034441     | -5.447944351     |
| 228409_at    | PLIN4                          | -4.187134974     | -6.150204056     |
| 219059_s_at  | LYVE1                          | -4.191847970     | -3.575457156     |
| 225424_at    | GPAM                           | -4.206766942     | -3.930299013     |
| 209763_at    | CHRD1                          | -4.208485528     | -6.297795853     |
| 229778_at    | SPX                            | -4.248922955     | -2.566711179     |
| 204719_at    | ABCA8                          | -4.279810110     | -5.937530640     |
| 203548_s_at  | LPL                            | -4.303123152     | -4.860340966     |
| 229839_at    | SCARA5                         | -4.391365693     | -7.041536306     |
| 1552519_at   | ACVR1C                         | -4.394341287     | -4.386066809     |
| 219295_s_at  | PCOLCE2                        | -4.513115299     | -4.139449996     |
| 208383_s_at  | PCK1                           | -4.580875770     | -3.433355916     |
| 205913_at    | PLIN1                          | -4.622433796     | -6.460266315     |
| 209612_s_at  | ADH1B                          | -4.673708458     | -6.606583651     |
| 235978_at    | FABP4                          | -4.742014503     | -5.372201413     |
| 209613_s_at  | ADH1B                          | -4.798081277     | -6.763654096     |
| 207175_at    | ADIPOQ                         | -4.893867509     | -8.234528763     |
| 219140_s_at  | RBP4                           | -4.981521322     | -7.011996199     |
| 207092_at    | LEP                            | -5.155413254     | -6.893170505     |

<sup>a</sup>These probes and corresponding genes belong to lncRNA type.

Table SII. GO functional enrichment and KEGG pathway enrichment of the 322 commonly differentially expressed genes.

| A, GO functional enrichment |            |                                                          |            |           |                       |                       |                       |                                                                                                                            |       |
|-----------------------------|------------|----------------------------------------------------------|------------|-----------|-----------------------|-----------------------|-----------------------|----------------------------------------------------------------------------------------------------------------------------|-------|
| Ontology                    | ID         | Description                                              | Gene ratio | BgRatio   | P-value               | P.adjust              | q-value               | Gene ID                                                                                                                    | Count |
| BP                          | GO:0001101 | 'Response to acid chemical'                              | 20/218     | 324/17381 | 5.00x10 <sup>-9</sup> | 1.61x10 <sup>-5</sup> | 1.22x10 <sup>-5</sup> | 1036/1645/1646/2706/2934/358/3952/<br>4915/5105/5166/54331/5468/55022/<br>5950/7049/7298/8322/891/9370/948                 | 20    |
| BP                          | GO:0010876 | 'Lipid localization'                                     | 21/218     | 380/17381 | 1.43x10 <sup>-8</sup> | 2.30x10 <sup>-5</sup> | 1.75x10 <sup>-5</sup> | 10351/1066/1149/1191/130399/1645/301/<br>32/338328/3624/3952/4023/5468/5950/<br>6696/7069/80763/8322/857/9370/948          | 21    |
| BP                          | GO:0140014 | 'Mitotic nuclear division'                               | 16/218     | 253/17381 | 1.31x10 <sup>-7</sup> | 1.26x10 <sup>-4</sup> | 9.61x10 <sup>-5</sup> | 1028/1063/11065/11130/22974/332/<br>3479/4085/51203/54443/6790/701/891/<br>9055/9232/991                                   | 16    |
| BP                          | GO:1901652 | 'Response to peptide'                                    | 22/218     | 477/17381 | 1.57x10 <sup>-7</sup> | 1.26x10 <sup>-4</sup> | 9.61x10 <sup>-5</sup> | 1036/10580/130399/23235/2690/2706/2791/<br>286753/301/3479/3952/5105/5140/5166/<br>54331/5468/55022/7049/7079/857/9370/948 | 22    |
| BP                          | GO:0043434 | 'Response to peptide hormone'                            | 20/218     | 410/17381 | 2.44x10 <sup>-7</sup> | 1.57x10 <sup>-4</sup> | 1.19x10 <sup>-4</sup> | 1036/10580/130399/23235/2690/2706/2791/<br>286753/301/3952/5105/5140/5166/54331/<br>5468/55022/7049/7079/857/9370          | 20    |
| BP                          | GO:0006869 | 'Lipid transport'                                        | 18/218     | 347/17381 | 4.11x10 <sup>-7</sup> | 2.20x10 <sup>-4</sup> | 1.67x10 <sup>-4</sup> | 10351/1066/1191/1645/301/32/338328/<br>3624/3952/5468/5950/6696/7069/80763/<br>8322/857/9370/948                           | 18    |
| BP                          | GO:0000280 | 'Nuclear division'                                       | 19/218     | 393/17381 | 5.66x10 <sup>-7</sup> | 2.60x10 <sup>-4</sup> | 1.98x10 <sup>-4</sup> | 1028/1063/11065/11130/1164/22974/<br>259266/332/3479/4085/51203/54443/<br>6790/701/7153/891/9055/9232/991                  | 19    |
| BP                          | GO:0031145 | 'Anaphase-promoting complex-dependent catabolic process' | 9/218      | 80/17381  | 6.98x10 <sup>-7</sup> | 2.81x10 <sup>-4</sup> | 2.14x10 <sup>-4</sup> | 11065/4085/6790/701/84417/891/9232/<br>983/991                                                                             | 9     |
| BP                          | GO:0070542 | 'Response to fatty acid'                                 | 9/218      | 83/17381  | 9.58x10 <sup>-7</sup> | 3.42x10 <sup>-4</sup> | 2.60x10 <sup>-4</sup> | 1646/5166/54331/5468/55022/7049/891/<br>9370/948                                                                           | 9     |
| BP                          | GO:0019915 | 'Lipid storage'                                          | 8/218      | 63/17381  | 1.15x10 <sup>-6</sup> | 3.71x10 <sup>-4</sup> | 2.82x10 <sup>-4</sup> | 1149/130399/32/3952/4023/5468/857/948                                                                                      | 8     |
| BP                          | GO:0051235 | 'Maintenance of location'                                | 16/218     | 302/17381 | 1.40x10 <sup>-6</sup> | 4.10x10 <sup>-4</sup> | 3.12x10 <sup>-4</sup> | 1149/130399/161176/1756/259266/287/2934/<br>32/3627/3952/4023/477/5468/83660/857/948                                       | 16    |
| BP                          | GO:1901653 | 'Cellular response to peptide'                           | 17/218     | 345/17381 | 1.76x10 <sup>-6</sup> | 4.72x10 <sup>-4</sup> | 3.59x10 <sup>-4</sup> | 10580/23235/2690/2706/2791/286753/3479/<br>3952/5105/5140/5166/54331/5468/55022/<br>857/9370/948                           | 17    |
| BP                          | GO:0048285 | 'Organelle fission'                                      | 19/218     | 439/17381 | 2.93x10 <sup>-6</sup> | 6.71x10 <sup>-4</sup> | 5.10x10 <sup>-4</sup> | 1028/1063/11065/11130/1164/22974/259266/<br>332/3479/4085/51203/54443/6790/701/<br>7153/891/9055/9232/991                  | 19    |
| BP                          | GO:0051783 | 'Regulation of nuclear division'                         | 12/218     | 181/17381 | 3.10x10 <sup>-6</sup> | 6.71x10 <sup>-4</sup> | 5.10x10 <sup>-4</sup> | 1028/1063/11065/3479/4085/51203/54443/<br>6790/701/891/9232/991                                                            | 12    |

Table SII. Continued.

| Ontology | ID         | Description                                                                        | Gene ratio | BgRatio   | P-value               | P.adjust              | q-value               | Gene ID                                                                              | Count |
|----------|------------|------------------------------------------------------------------------------------|------------|-----------|-----------------------|-----------------------|-----------------------|--------------------------------------------------------------------------------------|-------|
| BP       | GO:0019216 | 'Regulation of lipid metabolic process'                                            | 17/218     | 360/17381 | 3.13x10 <sup>-6</sup> | 6.71x10 <sup>-4</sup> | 5.10x10 <sup>-4</sup> | 10580/1149/301/32/3952/50486/5140/5166/5468/57678/6713/7069/83643/85329/857/9370/948 | 17    |
| BP       | GO:0031099 | 'Regeneration'                                                                     | 12/218     | 186/17381 | 4.11x10 <sup>-6</sup> | 8.27x10 <sup>-4</sup> | 6.29x10 <sup>-4</sup> | 10631/2934/301/3479/4147/5468/6696/6790/7049/7298/891/983                            | 12    |
| BP       | GO:0007088 | 'Regulation of mitotic nuclear division'                                           | 11/218     | 157/17381 | 4.74x10 <sup>-6</sup> | 8.96x10 <sup>-4</sup> | 6.81x10 <sup>-4</sup> | 1028/1063/11065/3479/4085/51203/54443/6790/701/891/9232                              | 11    |
| BP       | GO:0097305 | 'Response to alcohol'                                                              | 12/218     | 190/17381 | 5.12x10 <sup>-6</sup> | 9.15x10 <sup>-4</sup> | 6.96x10 <sup>-4</sup> | 1036/1365/2934/3624/3952/54331/5468/5950/7049/7298/9370/983                          | 12    |
| BP       | GO:0071375 | 'Cellular response to peptide hormone stimulus'                                    | 15/218     | 303/17381 | 6.88x10 <sup>-6</sup> | 1.07x10 <sup>-3</sup> | 8.12x10 <sup>-4</sup> | 10580/23235/2690/2706/2791/286753/3952/5105/5140/5166/54331/5468/55022/857/9370      | 15    |
| BP       | GO:0000819 | 'Sister chromatid segregation'                                                     | 13/218     | 230/17381 | 6.97x10 <sup>-6</sup> | 1.07x10 <sup>-3</sup> | 8.12x10 <sup>-4</sup> | 1063/11065/11130/332/4085/51203/701/7153/79682/891/9055/9232/991                     | 13    |
| BP       | GO:0015850 | 'Organic hydroxy compound transport'                                               | 13/218     | 230/17381 | 6.97x10 <sup>-6</sup> | 1.07x10 <sup>-3</sup> | 8.12x10 <sup>-4</sup> | 1066/1191/1645/358/364/3952/5468/5950/6696/857/9194/9370/948                         | 13    |
| BP       | GO:0071229 | 'Cellular response to acid chemical'                                               | 12/218     | 197/17381 | 7.42x10 <sup>-6</sup> | 1.08x10 <sup>-3</sup> | 8.25x10 <sup>-4</sup> | 1645/1646/358/3952/4915/5105/5166/54331/5468/55022/8322/891                          | 12    |
| BP       | GO:0030301 | 'Cholesterol transport'                                                            | 8/218      | 84/17381  | 1.04x10 <sup>-5</sup> | 1.45x10 <sup>-3</sup> | 1.10x10 <sup>-3</sup> | 1066/1191/1645/3952/5468/857/9370/948                                                | 8     |
| BP       | GO:0000070 | 'Mitotic sister chromatid segregation'                                             | 10/218     | 142/17381 | 1.23x10 <sup>-5</sup> | 1.65x10 <sup>-3</sup> | 1.26x10 <sup>-3</sup> | 1063/11065/11130/4085/51203/701/891/9055/9232/991                                    | 10    |
| BP       | GO:0010883 | 'Regulation of lipid storage'                                                      | 6/218      | 42/17381  | 1.31x10 <sup>-5</sup> | 1.68x10 <sup>-3</sup> | 1.28x10 <sup>-3</sup> | 1149/32/3952/4023/5468/948                                                           | 6     |
| BP       | GO:0045981 | 'Positive regulation of nucleotide metabolic process'                              | 10/218     | 145/17381 | 1.48x10 <sup>-5</sup> | 1.76x10 <sup>-3</sup> | 1.34x10 <sup>-3</sup> | 2774/2819/3479/3627/4881/55022/56246/891/9590/983                                    | 10    |
| BP       | GO:1900544 | 'Positive regulation of purine nucleotide metabolic process'                       | 10/218     | 145/17381 | 1.48x10 <sup>-5</sup> | 1.76x10 <sup>-3</sup> | 1.34x10 <sup>-3</sup> | 2774/2819/3479/3627/4881/55022/56246/891/9590/983                                    | 10    |
| BP       | GO:0042787 | 'Protein ubiquitination involved in ubiquitin-dependent protein catabolic process' | 12/218     | 214/17381 | 1.71x10 <sup>-5</sup> | 1.96x10 <sup>-3</sup> | 1.49x10 <sup>-3</sup> | 11065/114818/1191/29128/401265/4085/6790/701/891/9232/983/991                        | 12    |
| BP       | GO:0015918 | 'Sterol transport'                                                                 | 8/218      | 91/17381  | 1.87x10 <sup>-5</sup> | 2.08x10 <sup>-3</sup> | 1.58x10 <sup>-3</sup> | 1066/1191/1645/3952/5468/857/9370/948                                                | 8     |
| BP       | GO:0071695 | 'Anatomical structure maturation'                                                  | 10/218     | 150/17381 | 1.99x10 <sup>-5</sup> | 2.13x10 <sup>-3</sup> | 1.62x10 <sup>-3</sup> | 1028/1910/30819/3202/342035/3479/3952/6790/7298/891                                  | 10    |
| BP       | GO:0010965 | 'Regulation of mitotic sister chromatid separation'                                | 6/218      | 50/17381  | 3.64x10 <sup>-5</sup> | 3.78x10 <sup>-3</sup> | 2.88x10 <sup>-3</sup> | 1063/11065/4085/701/891/9232                                                         | 6     |
| BP       | GO:0046683 | 'Response to organophosphorus'                                                     | 9/218      | 131/17381 | 4.10x10 <sup>-5</sup> | 4.12x10 <sup>-3</sup> | 3.13x10 <sup>-3</sup> | 1036/1645/2819/358/5105/5138/6382/7298/9370                                          | 9     |
| BP       | GO:0051304 | 'Chromosome separation'                                                            | 7/218      | 75/17381  | 4.27x10 <sup>-5</sup> | 4.16x10 <sup>-3</sup> | 3.17x10 <sup>-3</sup> | 1063/11065/4085/701/7153/891/9232                                                    | 7     |

Table SII. Continued.

| Ontology | ID         | Description                                                   | Gene ratio | BgRatio   | P-value               | P.adjust              | q-value               | Gene ID                                                                                  | Count |
|----------|------------|---------------------------------------------------------------|------------|-----------|-----------------------|-----------------------|-----------------------|------------------------------------------------------------------------------------------|-------|
| BP       | GO:0051306 | 'Mitotic sister chromatid separation'                         | 6/218      | 52/17381  | 4.57x10 <sup>-5</sup> | 4.32x10 <sup>-3</sup> | 3.29x10 <sup>-3</sup> | 1063/11065/4085/701/891/9232                                                             | 6     |
| BP       | GO:0046890 | 'Regulation of lipid biosynthetic process'                    | 10/218     | 167/17381 | 5.00x10 <sup>-5</sup> | 4.50x10 <sup>-3</sup> | 3.43x10 <sup>-3</sup> | 10580/301/32/3952/5166/57678/6713/7069/83643/9370                                        | 10    |
| BP       | GO:0070293 | 'Renal absorption'                                            | 4/218      | 17/17381  | 5.04x10 <sup>-5</sup> | 4.50x10 <sup>-3</sup> | 3.43x10 <sup>-3</sup> | 2934/3043/358/9370                                                                       | 4     |
| BP       | GO:1903580 | 'Positive regulation of ATP metabolic process'                | 5/218      | 33/17381  | 5.28x10 <sup>-5</sup> | 4.59x10 <sup>-3</sup> | 3.49x10 <sup>-3</sup> | 2819/3479/55022/891/983                                                                  | 5     |
| BP       | GO:0046323 | 'Glucose import'                                              | 7/218      | 78/17381  | 5.51x10 <sup>-5</sup> | 4.66x10 <sup>-3</sup> | 3.55x10 <sup>-3</sup> | 10580/2719/286753/3479/3952/55022/9370                                                   | 7     |
| BP       | GO:1905818 | 'Regulation of chromosome separation'                         | 6/218      | 54/17381  | 5.68x10 <sup>-5</sup> | 4.68x10 <sup>-3</sup> | 3.56x10 <sup>-3</sup> | 1063/11065/4085/701/891/9232                                                             | 6     |
| BP       | GO:2000816 | 'Negative regulation of mitotic sister chromatid separation'  | 5/218      | 34/17381  | 6.13x10 <sup>-5</sup> | 4.93x10 <sup>-3</sup> | 3.75x10 <sup>-3</sup> | 1063/4085/701/891/9232                                                                   | 5     |
| BP       | GO:0071398 | 'Cellular response to fatty acid'                             | 6/218      | 55/17381  | 6.31x10 <sup>-5</sup> | 4.95x10 <sup>-3</sup> | 3.76x10 <sup>-3</sup> | 1646/5166/54331/5468/55022/891                                                           | 6     |
| BP       | GO:1905819 | 'Negative regulation of chromosome separation'                | 5/218      | 35/17381  | 7.08x10 <sup>-5</sup> | 5.41x10 <sup>-3</sup> | 4.12x10 <sup>-3</sup> | 1063/4085/701/891/9232                                                                   | 5     |
| BP       | GO:0016525 | 'Negative regulation of angiogenesis'                         | 8/218      | 110/17381 | 7.37x10 <sup>-5</sup> | 5.41x10 <sup>-3</sup> | 4.12x10 <sup>-3</sup> | 3202/3627/4223/4881/5140/5468/64102/79812                                                | 8     |
| BP       | GO:0008217 | 'Regulation of blood pressure'                                | 10/218     | 175/17381 | 7.41x10 <sup>-5</sup> | 5.41x10 <sup>-3</sup> | 4.12x10 <sup>-3</sup> | 10631/1910/3043/3952/4311/477/4881/5468/80763/9370                                       | 10    |
| BP       | GO:2000181 | 'Negative regulation of blood vessel morphogenesis'           | 8/218      | 112/17381 | 8.37x10 <sup>-5</sup> | 5.98x10 <sup>-3</sup> | 4.55x10 <sup>-3</sup> | 3202/3627/4223/4881/5140/5468/64102/79812                                                | 8     |
| BP       | GO:0045931 | 'Positive regulation of mitotic cell cycle'                   | 9/218      | 145/17381 | 9.04x10 <sup>-5</sup> | 6.16x10 <sup>-3</sup> | 4.69x10 <sup>-3</sup> | 11065/301/3479/4085/51203/51514/6790/891/983                                             | 9     |
| BP       | GO:0001525 | 'Angiogenesis'                                                | 17/218     | 469/17381 | 9.23x10 <sup>-5</sup> | 6.16x10 <sup>-3</sup> | 4.69x10 <sup>-3</sup> | 126393/3202/358/3627/3952/3953/4162/4223/4881/5140/5168/5468/55273/64102/79812/84870/857 | 17    |
| BP       | GO:0033048 | 'Negative regulation of mitotic sister chromatid segregation' | 5/218      | 37/17381  | 9.23x10 <sup>-5</sup> | 6.16x10 <sup>-3</sup> | 4.69x10 <sup>-3</sup> | 1063/4085/701/891/9232                                                                   | 5     |
| BP       | GO:0003014 | 'Renal system process'                                        | 8/218      | 114/17381 | 9.49x10 <sup>-5</sup> | 6.16x10 <sup>-3</sup> | 4.69x10 <sup>-3</sup> | 1910/2934/3043/358/4162/4881/80763/9370                                                  | 8     |
| BP       | GO:0021700 | 'Developmental maturation'                                    | 12/218     | 256/17381 | 9.77x10 <sup>-5</sup> | 6.16x10 <sup>-3</sup> | 4.69x10 <sup>-3</sup> | 1028/1910/30819/3202/342035/3479/3952/5468/6790/7298/891/991                             | 12    |
| BP       | GO:0044241 | 'Lipid digestion'                                             | 4/218      | 20/17381  | 9.96x10 <sup>-5</sup> | 6.16x10 <sup>-3</sup> | 4.69x10 <sup>-3</sup> | 1645/358/3952/948                                                                        | 4     |
| BP       | GO:0098813 | 'Nuclear chromosome segregation'                              | 13/218     | 297/17381 | 1.00x10 <sup>-4</sup> | 6.16x10 <sup>-3</sup> | 4.69x10 <sup>-3</sup> | 1063/11065/11130/332/4085/51203/701/7153/79682/891/9055/9232/991                         | 13    |
| BP       | GO:0032844 | 'Regulation of homeostatic process'                           | 17/218     | 473/17381 | 1.02x10 <sup>-4</sup> | 6.16x10 <sup>-3</sup> | 4.69x10 <sup>-3</sup> | 1756/1910/2273/287/301/3202/3624/3627/3953/477/4881/5166/57678/6696/80763/857/948        | 17    |

Table SII. Continued.

| Ontology | ID         | Description                                                                                               | Gene ratio | BgRatio   | P-value               | P.adjust              | q-value               | Gene ID                                                                 | Count |
|----------|------------|-----------------------------------------------------------------------------------------------------------|------------|-----------|-----------------------|-----------------------|-----------------------|-------------------------------------------------------------------------|-------|
| BP       | GO:0033047 | 'Regulation of mitotic sister chromatid segregation'                                                      | 6/218      | 60/17381  | 1.03x10 <sup>-4</sup> | 6.16x10 <sup>-3</sup> | 4.69x10 <sup>-3</sup> | 1063/11065/4085/701/891/9232                                            | 6     |
| BP       | GO:0033046 | 'Negative regulation of sister Chromatid segregation'                                                     | 5/218      | 39/17381  | 1.21x10 <sup>-4</sup> | 6.90x10 <sup>-3</sup> | 5.25x10 <sup>-3</sup> | 1063/4085/701/891/9232                                                  | 5     |
| BP       | GO:1900542 | 'Regulation of purine nucleotide Metabolic process'                                                       | 12/218     | 262/17381 | 1.22x10 <sup>-4</sup> | 6.90x10 <sup>-3</sup> | 5.25x10 <sup>-3</sup> | 1910/2774/2819/3479/3627/4881/5138/5502/56246/891/9590/983              | 12    |
| BP       | GO:0007517 | 'Muscle organ development'                                                                                | 15/218     | 389/17381 | 1.22x10 <sup>-4</sup> | 6.90x10 <sup>-3</sup> | 5.25x10 <sup>-3</sup> | 1063/1301/1756/2273/3131/3479/3627/3679/4223/5950/6285/7049/857/891/983 | 15    |
| BP       | GO:0015909 | 'Long-chain fatty acid transport'                                                                         | 6/218      | 63/17381  | 1.36x10 <sup>-4</sup> | 7.08x10 <sup>-3</sup> | 5.38x10 <sup>-3</sup> | 301/32/5468/7069/80763/948                                              | 6     |
| BP       | GO:0008643 | 'Carbohydrate transport'                                                                                  | 9/218      | 153/17381 | 1.36x10 <sup>-4</sup> | 7.08x10 <sup>-3</sup> | 5.38x10 <sup>-3</sup> | 10580/2719/286753/3479/358/364/3952/5502/9370                           | 9     |
| BP       | GO:0051985 | 'Negative regulation of chromosomal segregation'                                                          | 5/218      | 40/17381  | 1.36x10 <sup>-4</sup> | 7.08x10 <sup>-3</sup> | 5.38x10 <sup>-3</sup> | 1063/4085/701/891/9232                                                  | 5     |
| BP       | GO:0006112 | 'Energy reserve metabolic process'                                                                        | 7/218      | 90/17381  | 1.37x10 <sup>-4</sup> | 7.08x10 <sup>-3</sup> | 5.38x10 <sup>-3</sup> | 10580/3479/3952/3953/5502/55022/8908                                    | 7     |
| BP       | GO:1901342 | 'Regulation of vasculature development'                                                                   | 13/218     | 307/17381 | 1.40x10 <sup>-4</sup> | 7.08x10 <sup>-3</sup> | 5.38x10 <sup>-3</sup> | 126393/3202/358/3627/3952/4223/4881/5140/5168/5468/55273/64102/79812    | 13    |
| BP       | GO:1901343 | 'Negative regulation of vasculature development'                                                          | 8/218      | 121/17381 | 1.44x10 <sup>-4</sup> | 7.08x10 <sup>-3</sup> | 5.38x10 <sup>-3</sup> | 3202/3627/4223/4881/5140/5468/64102/79812                               | 8     |
| BP       | GO:0015908 | 'Fatty acid transport'                                                                                    | 7/218      | 91/17381  | 1.47x10 <sup>-4</sup> | 7.08x10 <sup>-3</sup> | 5.38x10 <sup>-3</sup> | 301/32/3952/5468/7069/80763/948                                         | 7     |
| BP       | GO:0033273 | 'Response to vitamin'                                                                                     | 7/218      | 91/17381  | 1.47x10 <sup>-4</sup> | 7.08x10 <sup>-3</sup> | 5.38x10 <sup>-3</sup> | 10631/2934/3627/3952/5468/6696/7298                                     | 7     |
| BP       | GO:2000060 | 'Positive regulation of protein ubiquitination involved in ubiquitin-dependent protein catabolic process' | 7/218      | 91/17381  | 1.47x10 <sup>-4</sup> | 7.08x10 <sup>-3</sup> | 5.38x10 <sup>-3</sup> | 11065/1191/4085/701/891/983/991                                         | 7     |
| BP       | GO:0010884 | 'Positive regulation of lipid storage'                                                                    | 4/218      | 22/17381  | 1.47x10 <sup>-4</sup> | 7.08x10 <sup>-3</sup> | 5.38x10 <sup>-3</sup> | 1149/32/4023/948                                                        | 4     |
| BP       | GO:0006140 | 'Regulation of nucleotide metabolic process'                                                              | 12/218     | 269/17381 | 1.56x10 <sup>-4</sup> | 7.32x10 <sup>-3</sup> | 5.57x10 <sup>-3</sup> | 1910/2774/2819/3479/3627/4881/5138/5502/56246/891/9590/983              | 12    |
| BP       | GO:0015718 | 'Monocarboxylic acid transport'                                                                           | 9/218      | 156/17381 | 1.58x10 <sup>-4</sup> | 7.32x10 <sup>-3</sup> | 5.57x10 <sup>-3</sup> | 1645/301/32/3952/5468/7069/80763/9194/948                               | 9     |
| BP       | GO:0006006 | 'Glucose metabolic process'                                                                               | 10/218     | 192/17381 | 1.59x10 <sup>-4</sup> | 7.32x10 <sup>-3</sup> | 5.57x10 <sup>-3</sup> | 10580/2819/32/3479/3952/3953/5105/5166/5950/9370                        | 10    |
| BP       | GO:0046324 | 'Regulation of glucose import'                                                                            | 6/218      | 65/17381  | 1.62x10 <sup>-4</sup> | 7.34x10 <sup>-3</sup> | 5.58x10 <sup>-3</sup> | 10580/2719/3479/3952/55022/9370                                         | 6     |
| BP       | GO:0006631 | 'Fatty acid metabolic process'                                                                            | 14/218     | 356/17381 | 1.68x10 <sup>-4</sup> | 7.51x10 <sup>-3</sup> | 5.72x10 <sup>-3</sup> | 1066/1646/2690/301/32/3952/3991/4023/5166/5468/54988/57678/857/9370     | 14    |

Table SII. Continued.

| A, GO functional enrichment |            |                                                                                           |            |           |                       |                       |                       |                                                                                     |       |
|-----------------------------|------------|-------------------------------------------------------------------------------------------|------------|-----------|-----------------------|-----------------------|-----------------------|-------------------------------------------------------------------------------------|-------|
| Ontology                    | ID         | Description                                                                               | Gene ratio | BgRatio   | P-value               | P.adjust              | q-value               | Gene ID                                                                             | Count |
| BP                          | GO:0003012 | 'Muscle system process'                                                                   | 16/218     | 448/17381 | 1.76x10 <sup>-4</sup> | 7.75x10 <sup>-3</sup> | 5.90x10 <sup>-3</sup> | 10580/126393/1756/1910/23336/25802/287/2934/30819/3479/3952/477/5348/6330/80763/857 | 16    |
| BP                          | GO:0045765 | 'Regulation of angiogenesis'                                                              | 12/218     | 273/17381 | 1.78x10 <sup>-4</sup> | 7.75x10 <sup>-3</sup> | 5.90x10 <sup>-3</sup> | 126393/3202/358/3627/3952/4223/4881/5140/5168/5468/64102/79812                      | 12    |
| BP                          | GO:0032869 | 'Cellular response to insulin stimulus'                                                   | 10/218     | 195/17381 | 1.81x10 <sup>-4</sup> | 7.75x10 <sup>-3</sup> | 5.90x10 <sup>-3</sup> | 10580/23235/286753/3952/5105/5140/5166/5468/55022/9370                              | 10    |
| BP                          | GO:0015711 | 'Organic anion transport'                                                                 | 16/218     | 455/17381 | 2.10x10 <sup>-4</sup> | 8.87x10 <sup>-3</sup> | 6.75x10 <sup>-3</sup> | 1645/301/3039/3043/32/358/3952/477/4915/5468/56301/7069/762/80763/9194/948          | 16    |
| BP                          | GO:0042493 | 'Response to drug'                                                                        | 15/218     | 411/17381 | 2.23x10 <sup>-4</sup> | 9.29x10 <sup>-3</sup> | 7.07x10 <sup>-3</sup> | 10351/1063/301/32/358/3624/4023/5138/5468/7079/7298/891/9370/94274/983              | 15    |
| BP                          | GO:0006641 | 'Triglyceride metabolic process'                                                          | 7/218      | 98/17381  | 2.33x10 <sup>-4</sup> | 9.50x10 <sup>-3</sup> | 7.23x10 <sup>-3</sup> | 2167/3991/4023/5105/57678/7069/857                                                  | 7     |
| BP                          | GO:0010906 | 'Regulation of glucose metabolic process'                                                 | 7/218      | 98/17381  | 2.33x10 <sup>-4</sup> | 9.50x10 <sup>-3</sup> | 7.23x10 <sup>-3</sup> | 10580/32/3479/3952/3953/5166/9370                                                   | 7     |
| BP                          | GO:0030071 | 'Regulation of mitotic metaphase/anaphase transition'                                     | 5/218      | 45/17381  | 2.41x10 <sup>-4</sup> | 9.65x10 <sup>-3</sup> | 7.35x10 <sup>-3</sup> | 1063/11065/4085/701/891                                                             | 5     |
| BP                          | GO:0051348 | 'Negative regulation of transferase activity'                                             | 14/218     | 369/17381 | 2.43x10 <sup>-4</sup> | 9.65x10 <sup>-3</sup> | 7.35x10 <sup>-3</sup> | 1028/11065/131578/2167/4085/5468/5502/701/857/891/9052/9370/983/991                 | 14    |
| BP                          | GO:0048469 | 'Cell maturation'                                                                         | 9/218      | 166/17381 | 2.52x10 <sup>-4</sup> | 9.66x10 <sup>-3</sup> | 7.35x10 <sup>-3</sup> | 1028/1910/30819/3202/342035/5468/6790/7298/891                                      | 9     |
| BP                          | GO:1901990 | 'Regulation of mitotic cell cycle phase transition'                                       | 15/218     | 417/17381 | 2.60x10 <sup>-4</sup> | 9.66x10 <sup>-3</sup> | 7.35x10 <sup>-3</sup> | 1028/1063/11065/2273/22974/301/4085/51514/54443/55022/6790/701/891/983/991          | 15    |
| BP                          | GO:0045471 | 'Response to ethanol'                                                                     | 8/218      | 132/17381 | 2.62x10 <sup>-4</sup> | 9.66x10 <sup>-3</sup> | 7.35x10 <sup>-3</sup> | 1036/1365/2934/3952/5950/7298/9370/983                                              | 8     |
| BP                          | GO:0033045 | 'Regulation of sister chromatid segregation'                                              | 6/218      | 71/17381  | 2.64x10 <sup>-4</sup> | 9.66x10 <sup>-3</sup> | 7.35x10 <sup>-3</sup> | 1063/11065/4085/701/891/9232                                                        | 6     |
| BP                          | GO:0051436 | 'Negative regulation of ubiquitin-protein ligase activity involved in mitotic cell cycle' | 6/218      | 71/17381  | 2.64x10 <sup>-4</sup> | 9.66x10 <sup>-3</sup> | 7.35x10 <sup>-3</sup> | 11065/4085/701/891/983/991                                                          | 6     |
| BP                          | GO:0086001 | 'Cardiac muscle cell action potential'                                                    | 6/218      | 71/17381  | 2.64x10 <sup>-4</sup> | 9.66x10 <sup>-3</sup> | 7.35x10 <sup>-3</sup> | 1756/287/30819/477/6330/857                                                         | 6     |
| BP                          | GO:0086009 | 'Membrane repolarization'                                                                 | 5/218      | 46/17381  | 2.67x10 <sup>-4</sup> | 9.66x10 <sup>-3</sup> | 7.35x10 <sup>-3</sup> | 287/30819/477/6330/857                                                              | 5     |
| BP                          | GO:1902099 | 'Regulation of metaphase/anaphase transition of cell cycle'                               | 5/218      | 46/17381  | 2.67x10 <sup>-4</sup> | 9.66x10 <sup>-3</sup> | 7.35x10 <sup>-3</sup> | 1063/11065/4085/701/891                                                             | 5     |
| BP                          | GO:0051439 | 'Regulation of ubiquitin-protein ligase activity involved in mitotic cell cycle'          | 6/218      | 72/17381  | 2.85x10 <sup>-4</sup> | 1.02x10 <sup>-2</sup> | 7.74x10 <sup>-3</sup> | 11065/4085/701/891/983/991                                                          | 6     |

Table SII. Continued.

| A, GO functional enrichment |            |                                                                                                                    |            |           |                       |                       |                       |                                                                    |       |
|-----------------------------|------------|--------------------------------------------------------------------------------------------------------------------|------------|-----------|-----------------------|-----------------------|-----------------------|--------------------------------------------------------------------|-------|
| Ontology                    | ID         | Description                                                                                                        | Gene ratio | BgRatio   | P-value               | P.adjust              | q-value               | Gene ID                                                            | Count |
| BP                          | GO:0007091 | 'Metaphase/anaphase transition of mitotic cell cycle'                                                              | 5/218      | 47/17381  | 2.96x10 <sup>-4</sup> | 1.04x10 <sup>-2</sup> | 7.88x10 <sup>-3</sup> | 1063/11065/4085/701/891                                            | 5     |
| BP                          | GO:0045839 | 'Negative regulation of mitotic nuclear division'                                                                  | 5/218      | 47/17381  | 2.96x10 <sup>-4</sup> | 1.04x10 <sup>-2</sup> | 7.88x10 <sup>-3</sup> | 1063/4085/701/891/9232                                             | 5     |
| BP                          | GO:0032868 | 'Response to insulin'                                                                                              | 11/218     | 248/17381 | 3.07x10 <sup>-4</sup> | 1.05x10 <sup>-2</sup> | 8.00x10 <sup>-3</sup> | 10580/130399/23235/286753/3952/5105/5140/5166/5468/55022/9370      | 11    |
| BP                          | GO:0060420 | 'Regulation of heart growth'                                                                                       | 6/218      | 73/17381  | 3.07x10 <sup>-4</sup> | 1.05x10 <sup>-2</sup> | 8.00x10 <sup>-3</sup> | 32/3479/5950/7049/891/983                                          | 6     |
| BP                          | GO:0032526 | 'Response to retinoic acid'                                                                                        | 7/218      | 103/17381 | 3.17x10 <sup>-4</sup> | 1.07x10 <sup>-2</sup> | 8.17x10 <sup>-3</sup> | 2706/358/3952/5105/5468/5950/8322                                  | 7     |
| BP                          | GO:0033762 | 'Response to glucagon'                                                                                             | 5/218      | 48/17381  | 3.27x10 <sup>-4</sup> | 1.07x10 <sup>-2</sup> | 8.17x10 <sup>-3</sup> | 1036/2706/2791/5105/54331                                          | 5     |
| BP                          | GO:0044784 | 'Metaphase/anaphase transition of cell cycle'                                                                      | 5/218      | 48/17381  | 3.27x10 <sup>-4</sup> | 1.07x10 <sup>-2</sup> | 8.17x10 <sup>-3</sup> | 1063/11065/4085/701/891                                            | 5     |
| BP                          | GO:0060421 | 'Positive regulation of heart growth'                                                                              | 5/218      | 48/17381  | 3.27x10 <sup>-4</sup> | 1.07x10 <sup>-2</sup> | 8.17x10 <sup>-3</sup> | 32/3479/7049/891/983                                               | 5     |
| BP                          | GO:1905952 | 'Regulation of lipid localization'                                                                                 | 8/218      | 137/17381 | 3.37x10 <sup>-4</sup> | 1.09x10 <sup>-2</sup> | 8.33x10 <sup>-3</sup> | 1149/32/3952/4023/5468/6696/9370/948                               | 8     |
| BP                          | GO:2000241 | 'Regulation of reproductive process'                                                                               | 8/218      | 138/17381 | 3.54x10 <sup>-4</sup> | 1.13x10 <sup>-2</sup> | 8.62x10 <sup>-3</sup> | 130399/1910/259266/3479/3624/6790/983/991                          | 8     |
| BP                          | GO:0010827 | 'Regulation of glucose transport'                                                                                  | 6/218      | 75/17381  | 3.56x10 <sup>-4</sup> | 1.13x10 <sup>-2</sup> | 8.62x10 <sup>-3</sup> | 10580/2719/3479/3952/55022/9370                                    | 6     |
| BP                          | GO:0010639 | 'Negative regulation of organelle organization'                                                                    | 13/218     | 340/17381 | 3.76x10 <sup>-4</sup> | 1.17x10 <sup>-2</sup> | 8.91x10 <sup>-3</sup> | 1063/1191/130271/25802/2934/3479/4085/55022/6711/701/7153/891/9232 | 13    |
| BP                          | GO:2000058 | 'Regulation of protein ubiquitination involved in ubiquitin-dependent protein catabolic process'                   | 7/218      | 106/17381 | 3.78x10 <sup>-4</sup> | 1.17x10 <sup>-2</sup> | 8.91x10 <sup>-3</sup> | 11065/1191/4085/701/891/983/991                                    | 7     |
| BP                          | GO:0051437 | 'Positive regulation of ubiquitin-protein ligase activity involved in regulation of mitotic cell cycle transition' | 6/218      | 76/17381  | 3.82x10 <sup>-4</sup> | 1.17x10 <sup>-2</sup> | 8.91x10 <sup>-3</sup> | 11065/4085/701/891/983/991                                         | 6     |
| BP                          | GO:1905954 | 'Positive regulation of lipid localization'                                                                        | 6/218      | 76/17381  | 3.82x10 <sup>-4</sup> | 1.17x10 <sup>-2</sup> | 8.91x10 <sup>-3</sup> | 1149/32/4023/6696/9370/948                                         | 6     |
| BP                          | GO:0010889 | 'Regulation of sequestering of triglyceride'                                                                       | 3/218      | 12/17381  | 3.94x10 <sup>-4</sup> | 1.17x10 <sup>-2</sup> | 8.91x10 <sup>-3</sup> | 1149/4023/5468                                                     | 3     |
| BP                          | GO:0019934 | 'cGMP-mediated signaling'                                                                                          | 3/218      | 12/17381  | 3.94x10 <sup>-4</sup> | 1.17x10 <sup>-2</sup> | 8.91x10 <sup>-3</sup> | 1910/5138/948                                                      | 3     |
| BP                          | GO:2001241 | 'Positive regulation of extrinsic apoptotic signaling pathway in absence of ligand'                                | 3/218      | 12/17381  | 3.94x10 <sup>-4</sup> | 1.17x10 <sup>-2</sup> | 8.91x10 <sup>-3</sup> | 3624/5519/8406                                                     | 3     |
| BP                          | GO:2001238 | 'Positive regulation of extrinsic apoptotic signaling pathway'                                                     | 5/218      | 50/17381  | 3.97x10 <sup>-4</sup> | 1.17x10 <sup>-2</sup> | 8.91x10 <sup>-3</sup> | 3624/50486/5519/8406/857                                           | 5     |

Table SII. Continued.

| Ontology | ID         | Description                                                                         | Gene ratio | BgRatio   | P-value               | P.adjust              | q-value               | Gene ID                                                                    | Count |
|----------|------------|-------------------------------------------------------------------------------------|------------|-----------|-----------------------|-----------------------|-----------------------|----------------------------------------------------------------------------|-------|
| BP       | GO:1904667 | 'Negative regulation of ubiquitin protein ligase activity'                          | 6/218      | 77/17381  | 4.11x10 <sup>-4</sup> | 1.20x10 <sup>-2</sup> | 9.13x10 <sup>-3</sup> | 11065/4085/701/891/983/991                                                 | 6     |
| BP       | GO:0019932 | 'Second-messenger-mediated signaling'                                               | 12/218     | 300/17381 | 4.21x10 <sup>-4</sup> | 1.22x10 <sup>-2</sup> | 9.28x10 <sup>-3</sup> | 1756/1910/2774/287/3479/3627/477/5138/5140/54331/55273/948                 | 12    |
| BP       | GO:0007059 | 'Chromosome segregation'                                                            | 13/218     | 346/17381 | 4.44x10 <sup>-4</sup> | 1.27x10 <sup>-2</sup> | 9.68x10 <sup>-3</sup> | 1063/11065/11130/332/4085/51203/701/7153/79682/891/9055/9232/991           | 13    |
| BP       | GO:0010743 | 'Regulation of macrophage derived foam cell differentiation'                        | 4/218      | 29/17381  | 4.47x10 <sup>-4</sup> | 1.27x10 <sup>-2</sup> | 9.68x10 <sup>-3</sup> | 4023/5468/9370/948                                                         | 4     |
| BP       | GO:0045862 | 'Positive regulation of proteolysis'                                                | 14/218     | 393/17381 | 4.59x10 <sup>-4</sup> | 1.29x10 <sup>-2</sup> | 9.84x10 <sup>-3</sup> | 11065/1191/130399/26577/2934/4085/5468/6790/701/7123/857/891/983/991       | 14    |
| BP       | GO:0016042 | 'Lipid catabolic process'                                                           | 12/218     | 305/17381 | 4.88x10 <sup>-4</sup> | 1.36x10 <sup>-2</sup> | 1.04x10 <sup>-2</sup> | 1149/2167/32/3952/3991/4023/5140/5168/5346/6696/85329/9370                 | 12    |
| BP       | GO:0014074 | 'Response to purine-containing compound'                                            | 8/218      | 145/17381 | 4.93x10 <sup>-4</sup> | 1.37x10 <sup>-2</sup> | 1.04x10 <sup>-2</sup> | 1036/2819/358/5105/5138/5468/6382/9370                                     | 8     |
| BP       | GO:0010885 | 'Regulation of cholesterol storage'                                                 | 3/218      | 13/17381  | 5.07x10 <sup>-4</sup> | 1.37x10 <sup>-2</sup> | 1.04x10 <sup>-2</sup> | 4023/5468/948                                                              | 3     |
| BP       | GO:0007094 | 'Mitotic spindle assembly checkpoint'                                               | 4/218      | 30/17381  | 5.11x10 <sup>-4</sup> | 1.37x10 <sup>-2</sup> | 1.04x10 <sup>-2</sup> | 1063/4085/701/891                                                          | 4     |
| BP       | GO:0071173 | 'Spindle assembly checkpoint'                                                       | 4/218      | 30/17381  | 5.11x10 <sup>-4</sup> | 1.37x10 <sup>-2</sup> | 1.04x10 <sup>-2</sup> | 1063/4085/701/891                                                          | 4     |
| BP       | GO:0071174 | 'Mitotic spindle checkpoint'                                                        | 4/218      | 30/17381  | 5.11x10 <sup>-4</sup> | 1.37x10 <sup>-2</sup> | 1.04x10 <sup>-2</sup> | 1063/4085/701/891                                                          | 4     |
| BP       | GO:0046942 | 'Carboxylic acid transport'                                                         | 12/218     | 307/17381 | 5.17x10 <sup>-4</sup> | 1.37x10 <sup>-2</sup> | 1.05x10 <sup>-2</sup> | 1645/301/32/3952/477/4915/5468/56301/7069/80763/9194/948                   | 12    |
| BP       | GO:0006936 | 'Muscle contraction'                                                                | 13/218     | 352/17381 | 5.22x10 <sup>-4</sup> | 1.37x10 <sup>-2</sup> | 1.05x10 <sup>-2</sup> | 10580/126393/1756/1910/23336/25802/287/30819/477/5348/6330/80763/857       | 13    |
| BP       | GO:1901987 | 'Regulation of cell cycle phase transition'                                         | 15/218     | 446/17381 | 5.27x10 <sup>-4</sup> | 1.38x10 <sup>-2</sup> | 1.05x10 <sup>-2</sup> | 1028/1063/11065/2273/22974/301/4085/51514/54443/55022/6790/701/891/983/991 | 15    |
| BP       | GO:0006094 | 'Glucconeogenesis'                                                                  | 6/218      | 81/17381  | 5.39x10 <sup>-4</sup> | 1.39x10 <sup>-2</sup> | 1.06x10 <sup>-2</sup> | 2819/3952/3953/5105/5950/9370                                              | 6     |
| BP       | GO:0051384 | 'Response to glucocorticoid'                                                        | 8/218      | 147/17381 | 5.40x10 <sup>-4</sup> | 1.39x10 <sup>-2</sup> | 1.06x10 <sup>-2</sup> | 1036/2706/301/358/6285/6382/7298/9370                                      | 8     |
| BP       | GO:1903052 | 'Positive regulation of proteolysis involved in cellular protein catabolic process' | 9/218      | 185/17381 | 5.57x10 <sup>-4</sup> | 1.42x10 <sup>-2</sup> | 1.08x10 <sup>-2</sup> | 11065/1191/4085/6790/701/857/891/983/991                                   | 9     |
| BP       | GO:0034694 | 'Response to prostaglandin'                                                         | 4/218      | 31/17381  | 5.81x10 <sup>-4</sup> | 1.46x10 <sup>-2</sup> | 1.11x10 <sup>-2</sup> | 1646/54331/5468/7049                                                       | 4     |
| BP       | GO:0045841 | 'Negative regulation of mitotic metaphase/anaphase transition'                      | 4/218      | 31/17381  | 5.81x10 <sup>-4</sup> | 1.46x10 <sup>-2</sup> | 1.11x10 <sup>-2</sup> | 1063/4085/701/891                                                          | 4     |
| BP       | GO:0019935 | 'Cyclic-nucleotide-mediated signaling'                                              | 7/218      | 114/17381 | 5.87x10 <sup>-4</sup> | 1.46x10 <sup>-2</sup> | 1.11x10 <sup>-2</sup> | 1910/2774/3627/5138/5140/54331/948                                         | 7     |
| BP       | GO:0045732 | 'Positive regulation of protein catabolic process'                                  | 11/218     | 268/17381 | 5.89x10 <sup>-4</sup> | 1.46x10 <sup>-2</sup> | 1.11x10 <sup>-2</sup> | 11065/1191/2719/4085/51514/6790/701/857/891/983/991                        | 11    |

Table S11. Continued.

| Ontology | ID         | Description                                                          | Gene ratio | BgRatio   | P-value               | P.adjust              | q-value               | Gene ID                                                  | Count |
|----------|------------|----------------------------------------------------------------------|------------|-----------|-----------------------|-----------------------|-----------------------|----------------------------------------------------------|-------|
| BP       | GO:0006639 | 'Acylglycerol metabolic process'                                     | 7/218      | 115/17381 | 6.18x10 <sup>-4</sup> | 1.51x10 <sup>-2</sup> | 1.15x10 <sup>-2</sup> | 2167/3991/4023/5105/57678/7069/857                       | 7     |
| BP       | GO:0030299 | 'Intestinal cholesterol absorption'                                  | 3/218      | 14/17381  | 6.40x10 <sup>-4</sup> | 1.51x10 <sup>-2</sup> | 1.15x10 <sup>-2</sup> | 1645/3952/948                                            | 3     |
| BP       | GO:0098856 | 'Intestinal lipid absorption'                                        | 3/218      | 14/17381  | 6.40x10 <sup>-4</sup> | 1.51x10 <sup>-2</sup> | 1.15x10 <sup>-2</sup> | 1645/3952/948                                            | 3     |
| BP       | GO:0015849 | 'Organic acid transport'                                             | 12/218     | 315/17381 | 6.49x10 <sup>-4</sup> | 1.51x10 <sup>-2</sup> | 1.15x10 <sup>-2</sup> | 1645/301/32/3952/477/4915/5468/56301/7069/80763/9194/948 | 12    |
| BP       | GO:0006638 | 'Neutral lipid metabolic process'                                    | 7/218      | 116/17381 | 6.51x10 <sup>-4</sup> | 1.51x10 <sup>-2</sup> | 1.15x10 <sup>-2</sup> | 2167/3991/4023/5105/57678/7069/857                       | 7     |
| BP       | GO:0055088 | 'Lipid homeostasis'                                                  | 7/218      | 116/17381 | 6.51x10 <sup>-4</sup> | 1.51x10 <sup>-2</sup> | 1.15x10 <sup>-2</sup> | 1645/2167/338328/4023/5468/57678/857                     | 7     |
| BP       | GO:0019319 | 'Hexose biosynthetic process'                                        | 6/218      | 84/17381  | 6.55x10 <sup>-4</sup> | 1.51x10 <sup>-2</sup> | 1.15x10 <sup>-2</sup> | 2819/3952/3953/5105/5950/9370                            | 6     |
| BP       | GO:0051444 | 'Negative regulation of ubiquitin-protein transferase activity'      | 6/218      | 84/17381  | 6.55x10 <sup>-4</sup> | 1.51x10 <sup>-2</sup> | 1.15x10 <sup>-2</sup> | 11065/4085/701/891/983/991                               | 6     |
| BP       | GO:1904668 | 'Positive regulation of ubiquitin protein ligase activity'           | 6/218      | 84/17381  | 6.55x10 <sup>-4</sup> | 1.51x10 <sup>-2</sup> | 1.15x10 <sup>-2</sup> | 11065/4085/701/891/983/991                               | 6     |
| BP       | GO:1902100 | 'Negative regulation of metaphase/anaphase transition of cell cycle' | 4/218      | 32/17381  | 6.57x10 <sup>-4</sup> | 1.51x10 <sup>-2</sup> | 1.15x10 <sup>-2</sup> | 1063/4085/701/891                                        | 4     |
| BP       | GO:0019217 | 'Regulation of fatty acid metabolic process'                         | 6/218      | 85/17381  | 6.97x10 <sup>-4</sup> | 1.59x10 <sup>-2</sup> | 1.21x10 <sup>-2</sup> | 301/32/5166/5468/857/9370                                | 6     |
| BP       | GO:0015758 | 'Glucose transport'                                                  | 7/218      | 118/17381 | 7.21x10 <sup>-4</sup> | 1.63x10 <sup>-2</sup> | 1.24x10 <sup>-2</sup> | 10580/2719/286753/3479/3952/55022/9370                   | 7     |
| BP       | GO:0019318 | 'Hexose metabolic process'                                           | 10/218     | 233/17381 | 7.39x10 <sup>-4</sup> | 1.66x10 <sup>-2</sup> | 1.26x10 <sup>-2</sup> | 10580/2819/32/3479/3952/3953/5105/5166/5950/9370         | 10    |
| BP       | GO:0006066 | 'Alcohol metabolic process'                                          | 12/218     | 320/17381 | 7.45x10 <sup>-4</sup> | 1.66x10 <sup>-2</sup> | 1.27x10 <sup>-2</sup> | 1066/125/126/32/3479/3952/3953/3991/5105/57678/5950/6713 | 12    |
| BP       | GO:0045598 | 'Regulation of fat cell differentiation'                             | 7/218      | 119/17381 | 7.58x10 <sup>-4</sup> | 1.68x10 <sup>-2</sup> | 1.28x10 <sup>-2</sup> | 3952/4320/5468/7704/83643/85329/9370                     | 7     |
| BP       | GO:0045926 | 'Negative regulation of growth'                                      | 10/218     | 234/17381 | 7.64x10 <sup>-4</sup> | 1.68x10 <sup>-2</sup> | 1.28x10 <sup>-2</sup> | 2273/2719/3624/4499/4881/5468/56920/5950/6696/948        | 10    |
| BP       | GO:0051784 | 'Negative regulation of nuclear division'                            | 5/218      | 58/17381  | 7.91x10 <sup>-4</sup> | 1.70x10 <sup>-2</sup> | 1.29x10 <sup>-2</sup> | 1063/4085/701/891/9232                                   | 5     |
| BP       | GO:0010878 | 'Cholesterol storage'                                                | 3/218      | 15/17381  | 7.92x10 <sup>-4</sup> | 1.70x10 <sup>-2</sup> | 1.29x10 <sup>-2</sup> | 4023/5468/948                                            | 3     |
| BP       | GO:0030730 | 'Sequestering of triglyceride'                                       | 3/218      | 15/17381  | 7.92x10 <sup>-4</sup> | 1.70x10 <sup>-2</sup> | 1.29x10 <sup>-2</sup> | 1149/4023/5468                                           | 3     |
| BP       | GO:1990000 | 'Amyloid fibril formation'                                           | 3/218      | 15/17381  | 7.92x10 <sup>-4</sup> | 1.70x10 <sup>-2</sup> | 1.29x10 <sup>-2</sup> | 1191/2934/948                                            | 3     |
| BP       | GO:0016051 | 'Carbohydrate biosynthetic process'                                  | 9/218      | 195/17381 | 8.12x10 <sup>-4</sup> | 1.73x10 <sup>-2</sup> | 1.31x10 <sup>-2</sup> | 10580/2819/3479/3952/3953/5105/5950/8908/9370            | 9     |
| BP       | GO:0019432 | 'Triglyceride biosynthetic process'                                  | 4/218      | 34/17381  | 8.31x10 <sup>-4</sup> | 1.74x10 <sup>-2</sup> | 1.32x10 <sup>-2</sup> | 4023/5105/57678/7069                                     | 4     |
| BP       | GO:0031577 | 'Spindle checkpoint'                                                 | 4/218      | 34/17381  | 8.31x10 <sup>-4</sup> | 1.74x10 <sup>-2</sup> | 1.32x10 <sup>-2</sup> | 1063/4085/701/891                                        | 4     |
| BP       | GO:0007051 | 'Spindle organization'                                               | 8/218      | 157/17381 | 8.32x10 <sup>-4</sup> | 1.74x10 <sup>-2</sup> | 1.32x10 <sup>-2</sup> | 22974/259266/26112/332/6790/891/9055/991                 | 8     |

Table SII. Continued.

| Ontology | ID         | Description                                                 | Gene ratio | BgRatio   | P-value               | P.adjust              | q-value               | Gene ID                                           | Count |
|----------|------------|-------------------------------------------------------------|------------|-----------|-----------------------|-----------------------|-----------------------|---------------------------------------------------|-------|
| BP       | GO:0046622 | 'Positive regulation of organ growth'                       | 5/218      | 59/17381  | 8.56x10 <sup>-4</sup> | 1.78x10 <sup>-2</sup> | 1.35x10 <sup>-2</sup> | 32/3479/7049/891/983                              | 5     |
| BP       | GO:0050663 | 'Cytokine secretion'                                        | 9/218      | 197/17381 | 8.72x10 <sup>-4</sup> | 1.80x10 <sup>-2</sup> | 1.37x10 <sup>-2</sup> | 10631/1149/301/3952/4023/57678/6288/6711/948      | 9     |
| BP       | GO:1902850 | 'Microtubule cytoskeleton organization involved in mitosis' | 7/218      | 122/17381 | 8.78x10 <sup>-4</sup> | 1.80x10 <sup>-2</sup> | 1.37x10 <sup>-2</sup> | 22974/332/51203/6790/891/9055/991                 | 7     |
| BP       | GO:0010675 | 'Regulation of cellular carbohydrate metabolic process'     | 7/218      | 123/17381 | 9.21x10 <sup>-4</sup> | 1.83x10 <sup>-2</sup> | 1.39x10 <sup>-2</sup> | 10580/32/3479/3952/3953/5166/9370                 | 7     |
| BP       | GO:0014823 | 'Response to activity'                                      | 5/218      | 60/17381  | 9.24x10 <sup>-4</sup> | 1.83x10 <sup>-2</sup> | 1.39x10 <sup>-2</sup> | 10631/3952/5105/9370/983                          | 5     |
| BP       | GO:0010742 | 'Macrophage derived foam cell differentiation'              | 4/218      | 35/17381  | 9.29x10 <sup>-4</sup> | 1.83x10 <sup>-2</sup> | 1.39x10 <sup>-2</sup> | 4023/5468/9370/948                                | 4     |
| BP       | GO:0030261 | 'Chromosome condensation'                                   | 4/218      | 35/17381  | 9.29x10 <sup>-4</sup> | 1.83x10 <sup>-2</sup> | 1.39x10 <sup>-2</sup> | 51203/7153/891/983                                | 4     |
| BP       | GO:0090077 | 'Foam cell differentiation'                                 | 4/218      | 35/17381  | 9.29x10 <sup>-4</sup> | 1.83x10 <sup>-2</sup> | 1.39x10 <sup>-2</sup> | 4023/5468/9370/948                                | 4     |
| BP       | GO:0098801 | 'Regulation of renal system process'                        | 4/218      | 35/17381  | 9.29x10 <sup>-4</sup> | 1.83x10 <sup>-2</sup> | 1.39x10 <sup>-2</sup> | 1910/4881/80763/9370                              | 4     |
| BP       | GO:0046364 | 'Monosaccharide biosynthetic process'                       | 6/218      | 90/17381  | 9.42x10 <sup>-4</sup> | 1.85x10 <sup>-2</sup> | 1.41x10 <sup>-2</sup> | 2819/3952/3953/5105/5950/9370                     | 6     |
| BP       | GO:0140115 | 'Export across plasma membrane'                             | 3/218      | 16/17381  | 9.66x10 <sup>-4</sup> | 1.86x10 <sup>-2</sup> | 1.42x10 <sup>-2</sup> | 30819/477/5348                                    | 3     |
| BP       | GO:2000811 | 'Negative regulation of anoikis'                            | 3/218      | 16/17381  | 9.66x10 <sup>-4</sup> | 1.86x10 <sup>-2</sup> | 1.42x10 <sup>-2</sup> | 4915/5166/857                                     | 3     |
| BP       | GO:0008645 | 'Hexose transport'                                          | 7/218      | 124/17381 | 9.66x10 <sup>-4</sup> | 1.86x10 <sup>-2</sup> | 1.42x10 <sup>-2</sup> | 10580/2719/286753/3479/3952/55022/9370            | 7     |
| BP       | GO:0007093 | 'Mitotic cell cycle checkpoint'                             | 8/218      | 161/17381 | 9.80x10 <sup>-4</sup> | 1.88x10 <sup>-2</sup> | 1.43x10 <sup>-2</sup> | 10631/1130/4085/6790/701/7153/891/983             | 8     |
| BP       | GO:0008016 | 'Regulation of heart contraction'                           | 10/218     | 242/17381 | 9.87x10 <sup>-4</sup> | 1.88x10 <sup>-2</sup> | 1.43x10 <sup>-2</sup> | 1756/27129/287/30819/477/4881/5348/6330/80763/857 | 10    |
| BP       | GO:0001523 | 'Retinoid metabolic process'                                | 6/218      | 91/17381  | 9.98x10 <sup>-4</sup> | 1.89x10 <sup>-2</sup> | 1.44x10 <sup>-2</sup> | 1645/2719/338328/4023/5950/6382                   | 6     |
| BP       | GO:0031960 | 'Response to corticosteroid'                                | 8/218      | 162/17381 | 1.02x10 <sup>-3</sup> | 1.92x10 <sup>-2</sup> | 1.46x10 <sup>-2</sup> | 1036/2706/301/358/6285/6382/7298/9370             | 8     |
| BP       | GO:0046460 | 'Neutral lipid biosynthetic process'                        | 4/218      | 36/17381  | 1.04x10 <sup>-3</sup> | 1.92x10 <sup>-2</sup> | 1.46x10 <sup>-2</sup> | 4023/5105/57678/7069                              | 4     |
| BP       | GO:0046463 | 'Acylglycerol biosynthetic process'                         | 4/218      | 36/17381  | 1.04x10 <sup>-3</sup> | 1.92x10 <sup>-2</sup> | 1.46x10 <sup>-2</sup> | 4023/5105/57678/7069                              | 4     |
| BP       | GO:1903364 | 'Positive regulation of cellular protein catabolic process' | 9/218      | 202/17381 | 1.04x10 <sup>-3</sup> | 1.92x10 <sup>-2</sup> | 1.46x10 <sup>-2</sup> | 11065/1191/4085/6790/701/857/891/983/991          | 9     |
| BP       | GO:1904666 | 'Regulation of ubiquitin protein ligase activity'           | 6/218      | 92/17381  | 1.06x10 <sup>-3</sup> | 1.94x10 <sup>-2</sup> | 1.47x10 <sup>-2</sup> | 11065/4085/701/891/983/991                        | 6     |
| BP       | GO:0015749 | 'Monosaccharide transport'                                  | 7/218      | 126/17381 | 1.06x10 <sup>-3</sup> | 1.94x10 <sup>-2</sup> | 1.47x10 <sup>-2</sup> | 10580/2719/286753/3479/3952/55022/9370            | 7     |
| BP       | GO:0042246 | 'Tissue regeneration'                                       | 5/218      | 62/17381  | 1.07x10 <sup>-3</sup> | 1.95x10 <sup>-2</sup> | 1.48x10 <sup>-2</sup> | 10631/2934/301/3479/891                           | 5     |
| BP       | GO:0009187 | 'Cyclic nucleotide metabolic process'                       | 9/218      | 203/17381 | 1.08x10 <sup>-3</sup> | 1.95x10 <sup>-2</sup> | 1.48x10 <sup>-2</sup> | 1910/2774/358/3627/4881/5138/5140/56246/9590      | 9     |

Table SII. Continued.

| Ontology | ID         | Description                                                                | Gene ratio | BgRatio   | P-value               | P.adjust              | q-value               | Gene ID                                                                 | Count |
|----------|------------|----------------------------------------------------------------------------|------------|-----------|-----------------------|-----------------------|-----------------------|-------------------------------------------------------------------------|-------|
| BP       | GO:1903522 | 'Regulation of blood circulation'                                          | 11/218     | 289/17381 | 1.09x10 <sup>-3</sup> | 1.96x10 <sup>-2</sup> | 1.49x10 <sup>-2</sup> | 1756/27129/287/30819/3952/477/4881/5348/6330/80763/857                  | 11    |
| BP       | GO:0044320 | 'Cellular response to leptin stimulus'                                     | 3/218      | 17/17381  | 1.16x10 <sup>-3</sup> | 2.07x10 <sup>-2</sup> | 1.57x10 <sup>-2</sup> | 3952/3953/55022                                                         | 3     |
| BP       | GO:0002576 | 'Platelet degranulation'                                                   | 7/218      | 128/17381 | 1.16x10 <sup>-3</sup> | 2.07x10 <sup>-2</sup> | 1.57x10 <sup>-2</sup> | 1191/1675/3479/7018/7123/7450/948                                       | 7     |
| BP       | GO:0051047 | 'Positive regulation of secretion'                                         | 13/218     | 386/17381 | 1.22x10 <sup>-3</sup> | 2.15x10 <sup>-2</sup> | 1.64x10 <sup>-2</sup> | 10631/1910/3479/358/3624/3952/4023/4881/5950/6288/6382/6696/6711        | 13    |
| BP       | GO:0051983 | 'Regulation of chromosome segregation'                                     | 6/218      | 95/17381  | 1.25x10 <sup>-3</sup> | 2.19x10 <sup>-2</sup> | 1.67x10 <sup>-2</sup> | 1063/11065/4085/701/891/9232                                            | 6     |
| BP       | GO:0044262 | 'Cellular carbohydrate metabolic process'                                  | 10/218     | 250/17381 | 1.26x10 <sup>-3</sup> | 2.20x10 <sup>-2</sup> | 1.68x10 <sup>-2</sup> | 10580/32/3479/3952/3953/5105/5166/5502/8908/9370                        | 10    |
| BP       | GO:0035265 | 'Organ growth'                                                             | 8/218      | 168/17381 | 1.29x10 <sup>-3</sup> | 2.24x10 <sup>-2</sup> | 1.70x10 <sup>-2</sup> | 32/3479/3952/3953/5950/7049/891/983                                     | 8     |
| BP       | GO:0051225 | 'Spindle assembly'                                                         | 6/218      | 96/17381  | 1.32x10 <sup>-3</sup> | 2.27x10 <sup>-2</sup> | 1.72x10 <sup>-2</sup> | 22974/259266/26112/332/6790/991                                         | 6     |
| BP       | GO:0051591 | 'Response to cAMP'                                                         | 6/218      | 96/17381  | 1.32x10 <sup>-3</sup> | 2.27x10 <sup>-2</sup> | 1.72x10 <sup>-2</sup> | 1036/2819/358/5105/6382/9370                                            | 6     |
| BP       | GO:0009612 | 'Response to mechanical stimulus'                                          | 9/218      | 210/17381 | 1.36x10 <sup>-3</sup> | 2.31x10 <sup>-2</sup> | 1.76x10 <sup>-2</sup> | 10631/1301/1756/358/3627/477/5138/5468/891                              | 9     |
| BP       | GO:0045444 | 'Fat cell differentiation'                                                 | 9/218      | 210/17381 | 1.36x10 <sup>-3</sup> | 2.31x10 <sup>-2</sup> | 1.76x10 <sup>-2</sup> | 2167/3952/4320/5468/56246/7704/83643/85329/9370                         | 9     |
| BP       | GO:2000021 | 'Regulation of ion homeostasis'                                            | 9/218      | 210/17381 | 1.36x10 <sup>-3</sup> | 2.31x10 <sup>-2</sup> | 1.76x10 <sup>-2</sup> | 1756/1910/2273/287/3627/477/4881/80763/857                              | 9     |
| BP       | GO:0030835 | 'Negative regulation of actin filament depolymerization'                   | 4/218      | 39/17381  | 1.40x10 <sup>-3</sup> | 2.34x10 <sup>-2</sup> | 1.78x10 <sup>-2</sup> | 130271/25802/2934/6711                                                  | 4     |
| BP       | GO:0050873 | 'Brown fat cell differentiation'                                           | 4/218      | 39/17381  | 1.40x10 <sup>-3</sup> | 2.34x10 <sup>-2</sup> | 1.78x10 <sup>-2</sup> | 2167/3952/56246/9370                                                    | 4     |
| BP       | GO:0071377 | 'Cellular response to glucagon stimulus'                                   | 4/218      | 39/17381  | 1.40x10 <sup>-3</sup> | 2.34x10 <sup>-2</sup> | 1.78x10 <sup>-2</sup> | 2706/2791/5105/54331                                                    | 4     |
| BP       | GO:1901615 | 'Organic hydroxy compound metabolic process'                               | 15/218     | 492/17381 | 1.42x10 <sup>-3</sup> | 2.34x10 <sup>-2</sup> | 1.78x10 <sup>-2</sup> | 1066/125/126/1645/32/3479/3952/3953/3991/4128/4881/5105/57678/5950/6713 | 15    |
| BP       | GO:0042063 | 'Gliogenesis'                                                              | 10/218     | 254/17381 | 1.42x10 <sup>-3</sup> | 2.34x10 <sup>-2</sup> | 1.78x10 <sup>-2</sup> | 1191/147495/2934/301/4147/4781/4915/5468/6285/983                       | 10    |
| BP       | GO:0007062 | 'Sister chromatid cohesion'                                                | 7/218      | 133/17381 | 1.45x10 <sup>-3</sup> | 2.38x10 <sup>-2</sup> | 1.81x10 <sup>-2</sup> | 1063/11130/332/4085/701/79682/991                                       | 7     |
| BP       | GO:0048545 | 'Response to steroid hormone'                                              | 13/218     | 394/17381 | 1.46x10 <sup>-3</sup> | 2.38x10 <sup>-2</sup> | 1.81x10 <sup>-2</sup> | 1036/2706/301/358/477/5468/57678/6285/6382/6696/7298/857/9370           | 13    |
| BP       | GO:0016101 | 'Diterpenoid metabolic process'                                            | 6/218      | 98/17381  | 1.47x10 <sup>-3</sup> | 2.38x10 <sup>-2</sup> | 1.81x10 <sup>-2</sup> | 1645/2719/338328/4023/5950/6382                                         | 6     |
| BP       | GO:1903050 | 'Regulation of proteolysis involved in cellular protein catabolic process' | 10/218     | 257/17381 | 1.55x10 <sup>-3</sup> | 2.50x10 <sup>-2</sup> | 1.90x10 <sup>-2</sup> | 11065/1191/4085/55872/6790/701/857/891/983/991                          | 10    |
| BP       | GO:0007584 | 'Response to nutrient'                                                     | 8/218      | 173/17381 | 1.55x10 <sup>-3</sup> | 2.50x10 <sup>-2</sup> | 1.90x10 <sup>-2</sup> | 10631/2934/3627/3952/5468/6696/7298/9370                                | 8     |

Table SII. Continued.

| A, GO functional enrichment |            |                                                                 |            |           |                       |                       |                       |                                                                |       |
|-----------------------------|------------|-----------------------------------------------------------------|------------|-----------|-----------------------|-----------------------|-----------------------|----------------------------------------------------------------|-------|
| Ontology                    | ID         | Description                                                     | Gene ratio | BgRatio   | P-value               | P.adjust              | q-value               | Gene ID                                                        | Count |
| BP                          | GO:0008203 | 'Cholesterol metabolic process'                                 | 7/218      | 135/17381 | 1.58x10 <sup>-3</sup> | 2.51x10 <sup>-2</sup> | 1.91x10 <sup>-2</sup> | 1066/32/3952/3953/3991/57678/6713                              | 7     |
| BP                          | GO:0048639 | 'Positive regulation of developmental growth'                   | 8/218      | 174/17381 | 1.61x10 <sup>-3</sup> | 2.51x10 <sup>-2</sup> | 1.91x10 <sup>-2</sup> | 2690/32/3479/3952/57678/7049/891/983                           | 8     |
| BP                          | GO:0007096 | 'Regulation of exit from mitosis'                               | 3/218      | 19/17381  | 1.63x10 <sup>-3</sup> | 2.51x10 <sup>-2</sup> | 1.91x10 <sup>-2</sup> | 1028/11065/54443                                               | 3     |
| BP                          | GO:0008356 | 'Asymmetric cell division'                                      | 3/218      | 19/17381  | 1.63x10 <sup>-3</sup> | 2.51x10 <sup>-2</sup> | 1.91x10 <sup>-2</sup> | 259266/6660/7704                                               | 3     |
| BP                          | GO:0015669 | 'Gas transport'                                                 | 3/218      | 19/17381  | 1.63x10 <sup>-3</sup> | 2.51x10 <sup>-2</sup> | 1.91x10 <sup>-2</sup> | 3039/3043/358                                                  | 3     |
| BP                          | GO:0060419 | 'Heart growth'                                                  | 6/218      | 100/17381 | 1.63x10 <sup>-3</sup> | 2.51x10 <sup>-2</sup> | 1.91x10 <sup>-2</sup> | 32/3479/5950/7049/891/983                                      | 6     |
| BP                          | GO:0055021 | 'Regulation of cardiac muscle tissue growth'                    | 5/218      | 68/17381  | 1.63x10 <sup>-3</sup> | 2.51x10 <sup>-2</sup> | 1.91x10 <sup>-2</sup> | 3479/5950/7049/891/983                                         | 5     |
| BP                          | GO:0071300 | 'Cellular response to retinoic acid'                            | 5/218      | 68/17381  | 1.63x10 <sup>-3</sup> | 2.51x10 <sup>-2</sup> | 1.91x10 <sup>-2</sup> | 358/3952/5105/5468/8322                                        | 5     |
| BP                          | GO:0042176 | 'Regulation of protein catabolic process'                       | 13/218     | 399/17381 | 1.63x10 <sup>-3</sup> | 2.51x10 <sup>-2</sup> | 1.91x10 <sup>-2</sup> | 11065/1191/2719/4085/51514/55872/6790/701/7079/857/891/983/991 | 13    |
| BP                          | GO:0042551 | 'Neuron maturation'                                             | 4/218      | 41/17381  | 1.69x10 <sup>-3</sup> | 2.59x10 <sup>-2</sup> | 1.97x10 <sup>-2</sup> | 1028/1910/30819/342035                                         | 4     |
| BP                          | GO:0051899 | 'Membrane depolarization'                                       | 6/218      | 101/17381 | 1.71x10 <sup>-3</sup> | 2.61x10 <sup>-2</sup> | 1.98x10 <sup>-2</sup> | 2273/287/477/6330/857/9370                                     | 6     |
| BP                          | GO:0006109 | 'Regulation of carbohydrate metabolic process'                  | 8/218      | 176/17381 | 1.73x10 <sup>-3</sup> | 2.62x10 <sup>-2</sup> | 2.00x10 <sup>-2</sup> | 10580/2819/32/3479/3952/3953/5166/9370                         | 8     |
| BP                          | GO:0007052 | 'Mitotic spindle organization'                                  | 6/218      | 102/17381 | 1.80x10 <sup>-3</sup> | 2.70x10 <sup>-2</sup> | 2.06x10 <sup>-2</sup> | 22974/332/6790/891/9055/991                                    | 6     |
| BP                          | GO:0046620 | 'Regulation of organ growth'                                    | 6/218      | 102/17381 | 1.80x10 <sup>-3</sup> | 2.70x10 <sup>-2</sup> | 2.06x10 <sup>-2</sup> | 32/3479/5950/7049/891/983                                      | 6     |
| BP                          | GO:0031397 | 'Negative regulation of protein ubiquitination'                 | 7/218      | 139/17381 | 1.87x10 <sup>-3</sup> | 2.80x10 <sup>-2</sup> | 2.13x10 <sup>-2</sup> | 11065/4085/701/857/891/983/991                                 | 7     |
| BP                          | GO:0010869 | 'Regulation of receptor biosynthetic process'                   | 3/218      | 20/17381  | 1.90x10 <sup>-3</sup> | 2.81x10 <sup>-2</sup> | 2.14x10 <sup>-2</sup> | 3202/5468/9370                                                 | 3     |
| BP                          | GO:0033158 | 'Regulation of protein import into nucleus, translocation'      | 3/218      | 20/17381  | 1.90x10 <sup>-3</sup> | 2.81x10 <sup>-2</sup> | 2.14x10 <sup>-2</sup> | 3479/5138/983                                                  | 3     |
| BP                          | GO:0048638 | 'Regulation of developmental growth'                            | 11/218     | 310/17381 | 1.91x10 <sup>-3</sup> | 2.81x10 <sup>-2</sup> | 2.14x10 <sup>-2</sup> | 2690/32/3479/3952/56920/57678/5950/6696/7049/891/983           | 11    |
| BP                          | GO:0000082 | 'G1/S transition of mitotic cell cycle'                         | 10/218     | 265/17381 | 1.94x10 <sup>-3</sup> | 2.85x10 <sup>-2</sup> | 2.17x10 <sup>-2</sup> | 1033/2273/301/3624/55022/6241/6790/7298/891/983                | 10    |
| BP                          | GO:1902652 | 'Secondary alcohol metabolic process'                           | 7/218      | 140/17381 | 1.95x10 <sup>-3</sup> | 2.85x10 <sup>-2</sup> | 2.17x10 <sup>-2</sup> | 1066/32/3952/3953/3991/57678/6713                              | 7     |
| BP                          | GO:0051443 | 'Positive regulation of ubiquitin-protein transferase activity' | 6/218      | 104/17381 | 1.99x10 <sup>-3</sup> | 2.88x10 <sup>-2</sup> | 2.19x10 <sup>-2</sup> | 11065/4085/701/891/983/991                                     | 6     |
| BP                          | GO:0015980 | 'Energy derivation by oxidation of organic compounds'           | 10/218     | 266/17381 | 2.00x10 <sup>-3</sup> | 2.88x10 <sup>-2</sup> | 2.19x10 <sup>-2</sup> | 10580/2819/3479/3952/3953/5502/55022/8908/891/983              | 10    |
| BP                          | GO:0009636 | 'Response to toxic substance'                                   | 9/218      | 222/17381 | 2.00x10 <sup>-3</sup> | 2.88x10 <sup>-2</sup> | 2.19x10 <sup>-2</sup> | 10249/1066/3039/3043/6382/7298/891/948/983                     | 9     |

Table SII. Continued.

| A, GO functional enrichment |            |                                                                                                    |            |           |                       |                       |                       |                                                       |       |
|-----------------------------|------------|----------------------------------------------------------------------------------------------------|------------|-----------|-----------------------|-----------------------|-----------------------|-------------------------------------------------------|-------|
| Ontology                    | ID         | Description                                                                                        | Gene ratio | BgRatio   | P-value               | P.adjust              | q-value               | Gene ID                                               | Count |
| BP                          | GO:0046326 | 'Positive regulation of glucose import'                                                            | 4/218      | 43/17381  | 2.03x10 <sup>-3</sup> | 2.91x10 <sup>-2</sup> | 2.21x10 <sup>-2</sup> | 10580/2719/3479/9370                                  | 4     |
| BP                          | GO:0016202 | 'Regulation of striated muscle tissue development'                                                 | 7/218      | 142/17381 | 2.11x10 <sup>-3</sup> | 3.02x10 <sup>-2</sup> | 2.30x10 <sup>-2</sup> | 1063/3479/5950/6285/7049/891/983                      | 7     |
| BP                          | GO:0051216 | 'Cartilage development'                                                                            | 8/218      | 182/17381 | 2.14x10 <sup>-3</sup> | 3.03x10 <sup>-2</sup> | 2.30x10 <sup>-2</sup> | 1300/1301/3202/3952/4781/6660/7298/7704               | 8     |
| BP                          | GO:0000075 | 'Cell cycle checkpoint'                                                                            | 9/218      | 225/17381 | 2.19x10 <sup>-3</sup> | 3.03x10 <sup>-2</sup> | 2.30x10 <sup>-2</sup> | 1063/11130/4085/51514/6790/701/7153/891/983           | 9     |
| BP                          | GO:0044321 | 'Response to leptin'                                                                               | 3/218      | 21/17381  | 2.19x10 <sup>-3</sup> | 3.03x10 <sup>-2</sup> | 2.30x10 <sup>-2</sup> | 3952/3953/55022                                       | 3     |
| BP                          | GO:0061337 | 'Cardiac conduction'                                                                               | 7/218      | 143/17381 | 2.20x10 <sup>-3</sup> | 3.03x10 <sup>-2</sup> | 2.30x10 <sup>-2</sup> | 287/30819/477/4881/5348/6330/857                      | 7     |
| BP                          | GO:0015701 | 'Bicarbonate transport'                                                                            | 4/218      | 44/17381  | 2.21x10 <sup>-3</sup> | 3.03x10 <sup>-2</sup> | 2.30x10 <sup>-2</sup> | 3039/3043/358/762                                     | 4     |
| BP                          | GO:0046850 | 'Regulation of bone remodeling'                                                                    | 4/218      | 44/17381  | 2.21x10 <sup>-3</sup> | 3.03x10 <sup>-2</sup> | 2.30x10 <sup>-2</sup> | 3952/3953/5166/6696                                   | 4     |
| BP                          | GO:0055023 | 'Positive regulation of cardiac muscle tissue growth'                                              | 4/218      | 44/17381  | 2.21x10 <sup>-3</sup> | 3.03x10 <sup>-2</sup> | 2.30x10 <sup>-2</sup> | 3479/7049/891/983                                     | 4     |
| BP                          | GO:0055078 | 'Sodium ion homeostasis'                                                                           | 4/218      | 44/17381  | 2.21x10 <sup>-3</sup> | 3.03x10 <sup>-2</sup> | 2.30x10 <sup>-2</sup> | 1910/477/4881/80763                                   | 4     |
| BP                          | GO:0031398 | 'Positive regulation of protein ubiquitination'                                                    | 8/218      | 183/17381 | 2.21x10 <sup>-3</sup> | 3.03x10 <sup>-2</sup> | 2.30x10 <sup>-2</sup> | 11065/1191/4085/701/857/891/983/991                   | 8     |
| BP                          | GO:0048511 | 'Rhythmic process'                                                                                 | 11/218     | 316/17381 | 2.21x10 <sup>-3</sup> | 3.03x10 <sup>-2</sup> | 2.30x10 <sup>-2</sup> | 301/3131/3624/3952/4915/5468/7079/7153/7298/8322/9370 | 11    |
| BP                          | GO:1901861 | 'Regulation of muscle tissue development'                                                          | 7/218      | 144/17381 | 2.29x10 <sup>-3</sup> | 3.11x10 <sup>-2</sup> | 2.37x10 <sup>-2</sup> | 1063/3479/5950/6285/7049/891/983                      | 7     |
| BP                          | GO:0060047 | 'Heart contraction'                                                                                | 10/218     | 272/17381 | 2.35x10 <sup>-3</sup> | 3.19x10 <sup>-2</sup> | 2.42x10 <sup>-2</sup> | 1756/27129/287/30819/477/4881/5348/6330/80763/857     | 10    |
| BP                          | GO:0034637 | 'Cellular carbohydrate biosynthetic process'                                                       | 5/218      | 74/17381  | 2.37x10 <sup>-3</sup> | 3.20x10 <sup>-2</sup> | 2.43x10 <sup>-2</sup> | 10580/3479/3952/5105/8908                             | 5     |
| BP                          | GO:0030199 | 'Collagen fibril organization'                                                                     | 4/218      | 45/17381  | 2.40x10 <sup>-3</sup> | 3.22x10 <sup>-2</sup> | 2.45x10 <sup>-2</sup> | 1301/1805/4320/7146                                   | 4     |
| BP                          | GO:0006721 | 'Terpenoid metabolic process'                                                                      | 6/218      | 108/17381 | 2.40x10 <sup>-3</sup> | 3.22x10 <sup>-2</sup> | 2.45x10 <sup>-2</sup> | 1645/2719/338328/4023/5950/6382                       | 6     |
| BP                          | GO:1901654 | 'Response to ketone'                                                                               | 8/218      | 186/17381 | 2.44x10 <sup>-3</sup> | 3.22x10 <sup>-2</sup> | 2.45x10 <sup>-2</sup> | 2706/358/54331/5468/6696/7049/7298/857                | 8     |
| BP                          | GO:0005996 | 'Monosaccharide metabolic process'                                                                 | 10/218     | 274/17381 | 2.48x10 <sup>-3</sup> | 3.22x10 <sup>-2</sup> | 2.45x10 <sup>-2</sup> | 10580/2819/32/3479/3952/3953/5105/5166/5950/9370      | 10    |
| BP                          | GO:0001570 | 'Vasculogenesis'                                                                                   | 5/218      | 75/17381  | 2.51x10 <sup>-3</sup> | 3.22x10 <sup>-2</sup> | 2.45x10 <sup>-2</sup> | 4915/55273/7049/8322/857                              | 5     |
| BP                          | GO:0042632 | 'Cholesterol homeostasis'                                                                          | 5/218      | 75/17381  | 2.51x10 <sup>-3</sup> | 3.22x10 <sup>-2</sup> | 2.45x10 <sup>-2</sup> | 1645/2167/338328/4023/857                             | 5     |
| BP                          | GO:0055092 | 'Sterol homeostasis'                                                                               | 5/218      | 75/17381  | 2.51x10 <sup>-3</sup> | 3.22x10 <sup>-2</sup> | 2.45x10 <sup>-2</sup> | 1645/2167/338328/4023/857                             | 5     |
| BP                          | GO:1903779 | 'Regulation of cardiac conduction'                                                                 | 5/218      | 75/17381  | 2.51x10 <sup>-3</sup> | 3.22x10 <sup>-2</sup> | 2.45x10 <sup>-2</sup> | 287/477/4881/5348/857                                 | 5     |
| BP                          | GO:0010881 | 'Regulation of cardiac muscle contraction by regulation of the release of sequestered calcium ion' | 3/218      | 22/17381  | 2.51x10 <sup>-3</sup> | 3.22x10 <sup>-2</sup> | 2.45x10 <sup>-2</sup> | 1756/287/477                                          | 3     |

Table SII. Continued.

| Ontology | ID         | Description                                                                           | Gene ratio | BgRatio   | P-value               | P.adjust              | q-value               | Gene ID                                                            | Count |
|----------|------------|---------------------------------------------------------------------------------------|------------|-----------|-----------------------|-----------------------|-----------------------|--------------------------------------------------------------------|-------|
| BP       | GO:0035812 | 'Renal sodium excretion'                                                              | 3/218      | 22/17381  | 2.51x10 <sup>-3</sup> | 3.22x10 <sup>-2</sup> | 2.45x10 <sup>-2</sup> | 1910/4881/80763                                                    | 3     |
| BP       | GO:0035813 | 'Regulation of renal sodium excretion'                                                | 3/218      | 22/17381  | 2.51x10 <sup>-3</sup> | 3.22x10 <sup>-2</sup> | 2.45x10 <sup>-2</sup> | 1910/4881/80763                                                    | 3     |
| BP       | GO:0050995 | 'Negative regulation of lipid catabolic process'                                      | 3/218      | 22/17381  | 2.51x10 <sup>-3</sup> | 3.22x10 <sup>-2</sup> | 2.45x10 <sup>-2</sup> | 1149/32/5140                                                       | 3     |
| BP       | GO:0071379 | 'Cellular response to prostaglandin stimulus'                                         | 3/218      | 22/17381  | 2.51x10 <sup>-3</sup> | 3.22x10 <sup>-2</sup> | 2.45x10 <sup>-2</sup> | 1646/54331/5468                                                    | 3     |
| BP       | GO:0048634 | 'Regulation of muscle organ development'                                              | 7/218      | 147/17381 | 2.57x10 <sup>-3</sup> | 3.27x10 <sup>-2</sup> | 2.49x10 <sup>-2</sup> | 1063/3479/5950/6285/7049/891/983                                   | 7     |
| BP       | GO:0003015 | 'Heart process'                                                                       | 10/218     | 276/17381 | 2.61x10 <sup>-3</sup> | 3.31x10 <sup>-2</sup> | 2.52x10 <sup>-2</sup> | 1756/27129/287/30819/477/4881/5348/6330/80763/857                  | 10    |
| BP       | GO:0042180 | 'Cellular ketone metabolic process'                                                   | 9/218      | 231/17381 | 2.61x10 <sup>-3</sup> | 3.31x10 <sup>-2</sup> | 2.52x10 <sup>-2</sup> | 1645/1646/2819/301/32/5166/5468/857/9370                           | 9     |
| BP       | GO:0010828 | 'Positive regulation of glucose transport'                                            | 4/218      | 47/17381  | 2.82x10 <sup>-3</sup> | 3.55x10 <sup>-2</sup> | 2.70x10 <sup>-2</sup> | 10580/2719/3479/9370                                               | 4     |
| BP       | GO:0086012 | 'Membrane depolarization during cardiac muscle cell action potential'                 | 3/218      | 23/17381  | 2.86x10 <sup>-3</sup> | 3.58x10 <sup>-2</sup> | 2.73x10 <sup>-2</sup> | 287/477/6330                                                       | 3     |
| BP       | GO:2000209 | 'Regulation of anoxia'                                                                | 3/218      | 23/17381  | 2.86x10 <sup>-3</sup> | 3.58x10 <sup>-2</sup> | 2.73x10 <sup>-2</sup> | 4915/5166/857                                                      | 3     |
| BP       | GO:1903321 | 'Negative regulation of protein modification by small protein conjugation or removal' | 7/218      | 150/17381 | 2.87x10 <sup>-3</sup> | 3.58x10 <sup>-2</sup> | 2.73x10 <sup>-2</sup> | 11065/4085/701/857/891/983/991                                     | 7     |
| BP       | GO:0031667 | 'Response to nutrient levels'                                                         | 13/218     | 426/17381 | 2.89x10 <sup>-3</sup> | 3.58x10 <sup>-2</sup> | 2.73x10 <sup>-2</sup> | 10631/130399/2934/32/3627/3952/5105/5166/5468/6696/7298/80763/9370 | 13    |
| BP       | GO:0060986 | 'Endocrine hormone secretion'                                                         | 4/218      | 48/17381  | 3.04x10 <sup>-3</sup> | 3.75x10 <sup>-2</sup> | 2.85x10 <sup>-2</sup> | 358/3624/3952/8322                                                 | 4     |
| BP       | GO:2000649 | 'Regulation of sodium ion transmembrane transporter activity'                         | 4/218      | 48/17381  | 3.04x10 <sup>-3</sup> | 3.75x10 <sup>-2</sup> | 2.85x10 <sup>-2</sup> | 1756/477/5348/6330                                                 | 4     |
| BP       | GO:0061448 | 'Connective tissue development'                                                       | 9/218      | 237/17381 | 3.10x10 <sup>-3</sup> | 3.80x10 <sup>-2</sup> | 2.89x10 <sup>-2</sup> | 1300/1301/3202/3952/4781/64102/6660/7298/7704                      | 9     |
| BP       | GO:0044843 | 'Cell cycle G1/S phase transition'                                                    | 10/218     | 284/17381 | 3.20x10 <sup>-3</sup> | 3.91x10 <sup>-2</sup> | 2.97x10 <sup>-2</sup> | 1033/2273/301/3624/55022/6241/6790/7298/891/983                    | 10    |
| BP       | GO:0016125 | 'Sterol metabolic process'                                                            | 7/218      | 153/17381 | 3.21x10 <sup>-3</sup> | 3.91x10 <sup>-2</sup> | 2.97x10 <sup>-2</sup> | 1066/32/3952/3953/3991/57678/6713                                  | 7     |
| BP       | GO:0032800 | 'Receptor biosynthetic process'                                                       | 3/218      | 24/17381  | 3.24x10 <sup>-3</sup> | 3.92x10 <sup>-2</sup> | 2.98x10 <sup>-2</sup> | 3202/5468/9370                                                     | 3     |
| BP       | GO:0034695 | 'Response to prostaglandin E'                                                         | 3/218      | 24/17381  | 3.24x10 <sup>-3</sup> | 3.92x10 <sup>-2</sup> | 2.98x10 <sup>-2</sup> | 54331/5468/7049                                                    | 3     |
| BP       | GO:0030834 | 'Regulation of actin filament depolymerization'                                       | 4/218      | 49/17381  | 3.28x10 <sup>-3</sup> | 3.92x10 <sup>-2</sup> | 2.99x10 <sup>-2</sup> | 130271/25802/2934/6711                                             | 4     |
| BP       | GO:0071320 | 'Cellular response to cAMP'                                                           | 4/218      | 49/17381  | 3.28x10 <sup>-3</sup> | 3.92x10 <sup>-2</sup> | 2.99x10 <sup>-2</sup> | 2819/358/5105/9370                                                 | 4     |

Table SII. Continued.

| Ontology | ID         | Description                                                                           | Gene ratio | BgRatio   | P-value               | P.adjust              | q-value               | Gene ID                                                   | Count |
|----------|------------|---------------------------------------------------------------------------------------|------------|-----------|-----------------------|-----------------------|-----------------------|-----------------------------------------------------------|-------|
| BP       | GO:1903362 | 'Regulation of cellular protein catabolic process'                                    | 10/218     | 285/17381 | 3.28x10 <sup>-3</sup> | 3.92x10 <sup>-2</sup> | 2.99x10 <sup>-2</sup> | 11065/1191/4085/55872/6790/701/857/891/983/991            | 10    |
| BP       | GO:0031100 | 'Animal organ regeneration'                                                           | 5/218      | 80/17381  | 3.33x10 <sup>-3</sup> | 3.95x10 <sup>-2</sup> | 3.00x10 <sup>-2</sup> | 5468/6790/7049/7298/983                                   | 5     |
| BP       | GO:0051651 | 'Maintenance of location in cell'                                                     | 5/218      | 80/17381  | 3.33x10 <sup>-3</sup> | 3.95x10 <sup>-2</sup> | 3.00x10 <sup>-2</sup> | 161176/259266/2934/83660/857                              | 5     |
| BP       | GO:0002064 | 'Epithelial cell development'                                                         | 8/218      | 196/17381 | 3.37x10 <sup>-3</sup> | 3.98x10 <sup>-2</sup> | 3.03x10 <sup>-2</sup> | 1365/3202/5138/53405/6382/64102/7298/9370                 | 8     |
| BP       | GO:0030198 | 'Extracellular matrix' organization                                                   | 11/218     | 335/17381 | 3.46x10 <sup>-3</sup> | 4.07x10 <sup>-2</sup> | 3.10x10 <sup>-2</sup> | 10631/11096/1300/1301/1805/3679/4320/58494/6696/7146/7450 | 11    |
| BP       | GO:0045840 | 'Positive regulation of mitotic nuclear division'                                     | 4/218      | 50/17381  | 3.53x10 <sup>-3</sup> | 4.12x10 <sup>-2</sup> | 3.14x10 <sup>-2</sup> | 11065/3479/51203/6790                                     | 4     |
| BP       | GO:0009165 | 'Nucleotide biosynthetic process'                                                     | 11/218     | 336/17381 | 3.54x10 <sup>-3</sup> | 4.12x10 <sup>-2</sup> | 3.14x10 <sup>-2</sup> | 1910/2774/358/4881/5138/55022/56246/6241/7083/7298/9590   | 11    |
| BP       | GO:0043062 | 'Extracellular structure organization'                                                | 11/218     | 336/17381 | 3.54x10 <sup>-3</sup> | 4.12x10 <sup>-2</sup> | 3.14x10 <sup>-2</sup> | 10631/11096/1300/1301/1805/3679/4320/58494/6696/7146/7450 | 11    |
| BP       | GO:0043161 | 'Proteasome-mediated ubiquitin-dependent protein catabolic process'                   | 12/218     | 387/17381 | 3.65x10 <sup>-3</sup> | 4.21x10 <sup>-2</sup> | 3.20x10 <sup>-2</sup> | 11065/1191/4085/55872/6790/701/84417/857/891/9232/983/991 | 12    |
| BP       | GO:0044062 | 'Regulation of excretion'                                                             | 3/218      | 25/17381  | 3.65x10 <sup>-3</sup> | 4.21x10 <sup>-2</sup> | 3.20x10 <sup>-2</sup> | 1910/4881/80763                                           | 3     |
| BP       | GO:0032409 | 'Regulation of transporter activity'                                                  | 9/218      | 243/17381 | 3.65x10 <sup>-3</sup> | 4.21x10 <sup>-2</sup> | 3.20x10 <sup>-2</sup> | 1756/2273/287/30819/477/5348/5468/6330/857                | 9     |
| BP       | GO:0033002 | 'Muscle cell proliferation'                                                           | 8/218      | 199/17381 | 3.69x10 <sup>-3</sup> | 4.23x10 <sup>-2</sup> | 3.22x10 <sup>-2</sup> | 3479/4881/5468/5950/7049/891/9370/983                     | 8     |
| BP       | GO:0043255 | 'Regulation of carbohydrate biosynthetic process'                                     | 5/218      | 82/17381  | 3.70x10 <sup>-3</sup> | 4.23x10 <sup>-2</sup> | 3.22x10 <sup>-2</sup> | 10580/3479/3952/3953/9370                                 | 5     |
| BP       | GO:0071103 | 'DNA conformation change'                                                             | 10/218     | 290/17381 | 3.71x10 <sup>-3</sup> | 4.23x10 <sup>-2</sup> | 3.22x10 <sup>-2</sup> | 301/3017/3149/51203/7153/79682/8339/891/983/9837          | 10    |
| BP       | GO:1901293 | 'Nucleoside phosphate biosynthetic process'                                           | 11/218     | 339/17381 | 3.78x10 <sup>-3</sup> | 4.28x10 <sup>-2</sup> | 3.26x10 <sup>-2</sup> | 1910/2774/358/4881/5138/55022/56246/6241/7083/7298/9590   | 11    |
| BP       | GO:0001960 | 'Negative regulation of cytokine-mediated signaling pathway'                          | 4/218      | 51/17381  | 3.79x10 <sup>-3</sup> | 4.28x10 <sup>-2</sup> | 3.26x10 <sup>-2</sup> | 5468/83643/857/9370                                       | 4     |
| BP       | GO:0050994 | 'Regulation of lipid catabolic process'                                               | 4/218      | 51/17381  | 3.79x10 <sup>-3</sup> | 4.28x10 <sup>-2</sup> | 3.26x10 <sup>-2</sup> | 1149/32/5140/85329                                        | 4     |
| BP       | GO:1903322 | 'Positive regulation of protein modification by small protein conjugation or removal' | 8/218      | 200/17381 | 3.81x10 <sup>-3</sup> | 4.28x10 <sup>-2</sup> | 3.26x10 <sup>-2</sup> | 11065/1191/4085/701/857/891/983/991                       | 8     |
| BP       | GO:0050886 | 'Endocrine process'                                                                   | 5/218      | 83/17381  | 3.90x10 <sup>-3</sup> | 4.37x10 <sup>-2</sup> | 3.32x10 <sup>-2</sup> | 358/3624/3952/4311/8322                                   | 5     |
| BP       | GO:1900371 | 'Regulation of purine nucleotide biosynthetic process'                                | 7/218      | 159/17381 | 3.97x10 <sup>-3</sup> | 4.43x10 <sup>-2</sup> | 3.37x10 <sup>-2</sup> | 1910/2774/4881/5138/55022/56246/9590                      | 7     |

Table S11. Continued.

| A, GO functional enrichment |            |                                                                     |            |           |                        |                       |                       |                                                                                               |       |  |
|-----------------------------|------------|---------------------------------------------------------------------|------------|-----------|------------------------|-----------------------|-----------------------|-----------------------------------------------------------------------------------------------|-------|--|
| Ontology                    | ID         | Description                                                         | Gene Ratio | BgRatio   | P-value                | P.adjust              | q-value               | Gene ID                                                                                       | Count |  |
| BP                          | GO:0030042 | 'Actin filament depolymerization'                                   | 4/218      | 52/17381  | 4.07x10 <sup>-3</sup>  | 4.53x10 <sup>-2</sup> | 3.45x10 <sup>-2</sup> | 130271/25802/2934/6711                                                                        | 4     |  |
| BP                          | GO:0042044 | 'Fluid transport'                                                   | 3/218      | 26/17381  | 4.09x10 <sup>-3</sup>  | 4.53x10 <sup>-2</sup> | 3.45x10 <sup>-2</sup> | 1910/358/364                                                                                  | 3     |  |
| BP                          | GO:0030808 | 'Regulation of nucleotide biosynthetic process'                     | 7/218      | 160/17381 | 4.10x10 <sup>-3</sup>  | 4.53x10 <sup>-2</sup> | 3.45x10 <sup>-2</sup> | 1910/2774/4881/5138/55022/56246/9590                                                          | 7     |  |
| BP                          | GO:0048871 | 'Multicellular organismal homeostasis'                              | 11/218     | 343/17381 | 4.13x10 <sup>-3</sup>  | 4.55x10 <sup>-2</sup> | 3.46x10 <sup>-2</sup> | 1149/1910/32/358/39553/5166/5950/6696/7018/9079/948                                           | 11    |  |
| BP                          | GO:0000086 | 'G2/M transition of mitotic' cell cycle                             | 9/218      | 248/17381 | 4.17x10 <sup>-3</sup>  | 4.58x10 <sup>-2</sup> | 3.49x10 <sup>-2</sup> | 1063/2273/22974/51514/6790/891/9133/983/9833                                                  | 9     |  |
| BP                          | GO:0009896 | 'Positive regulation of catabolic process'                          | 13/218     | 447/17381 | 4.33x10 <sup>-3</sup>  | 4.74x10 <sup>-2</sup> | 3.60x10 <sup>-2</sup> | 11065/1191/2719/2819/3479/4085/51514/6790/701/857/891/983/991                                 | 13    |  |
| BP                          | GO:0060043 | 'Regulation of cardiac muscle cell proliferation'                   | 4/218      | 53/17381  | 4.36x10 <sup>-3</sup>  | 4.75x10 <sup>-2</sup> | 3.62x10 <sup>-2</sup> | 5950/7049/891/983                                                                             | 4     |  |
| BP                          | GO:0003018 | 'Vascular process in circulatory system'                            | 7/218      | 162/17381 | 4.39x10 <sup>-3</sup>  | 4.75x10 <sup>-2</sup> | 3.62x10 <sup>-2</sup> | 1910/3043/3952/477/4881/5138/857                                                              | 7     |  |
| BP                          | GO:0046058 | 'cAMP metabolic process'                                            | 7/218      | 162/17381 | 4.39x10 <sup>-3</sup>  | 4.75x10 <sup>-2</sup> | 3.62x10 <sup>-2</sup> | 1910/2774/3627/5138/5140/56246/9590                                                           | 7     |  |
| BP                          | GO:1901655 | 'Cellular response to ketone'                                       | 5/218      | 86/17381  | 4.54x10 <sup>-3</sup>  | 4.88x10 <sup>-2</sup> | 3.72x10 <sup>-2</sup> | 2706/358/54331/5468/6696                                                                      | 5     |  |
| BP                          | GO:0052652 | 'Cyclic purine nucleotide metabolic process'                        | 7/218      | 163/17381 | 4.54x10 <sup>-3</sup>  | 4.88x10 <sup>-2</sup> | 3.72x10 <sup>-2</sup> | 1910/2774/358/4881/5138/56246/9590                                                            | 7     |  |
| BP                          | GO:0010882 | 'Regulation of cardiac muscle contraction by calcium ion signaling' | 3/218      | 27/17381  | 4.56x10 <sup>-3</sup>  | 4.89x10 <sup>-2</sup> | 3.72x10 <sup>-2</sup> | 1756/287/477                                                                                  | 3     |  |
| CC                          | GO:0005811 | 'Lipid droplet'                                                     | 8/227      | 72/18511  | 2.76x10 <sup>-06</sup> | 4.29x10 <sup>-4</sup> | 3.12x10 <sup>-4</sup> | 1149/2167/3991/50486/5346/63924/729359/857                                                    | 8     |  |
| CC                          | GO:0005578 | 'Proteinaceous extracellular matrix'                                | 17/227     | 365/18511 | 2.84x10 <sup>-06</sup> | 4.29x10 <sup>-4</sup> | 3.12x10 <sup>-4</sup> | 10631/11096/1300/1301/131873/1805/256691/2719/342035/4147/4320/7049/7079/7146/7450/79812/8840 | 17    |  |
| CC                          | GO:0005911 | 'Cell-cell junction'                                                | 16/227     | 423/18511 | 7.10x10 <sup>-05</sup> | 5.57x10 <sup>-3</sup> | 4.06x10 <sup>-3</sup> | 10580/11346/1365/220296/2706/287/301/364/477/5010/5239/5348/58494/6330/8322/83660             | 16    |  |
| CC                          | GO:0043034 | 'Costamere'                                                         | 4/227      | 19/18511  | 7.39x10 <sup>-05</sup> | 5.57x10 <sup>-3</sup> | 4.06x10 <sup>-3</sup> | 1756/23336/287/5239                                                                           | 4     |  |
| CC                          | GO:0000779 | 'Condensed chromosome, centromeric region'                          | 8/227      | 116/18511 | 9.22x10 <sup>-05</sup> | 5.57x10 <sup>-3</sup> | 4.06x10 <sup>-3</sup> | 1063/11130/332/4085/6790/701/79682/891                                                        | 8     |  |
| CC                          | GO:0042383 | 'Sarcolemma'                                                        | 8/227      | 122/18511 | 1.31x10 <sup>-4</sup>  | 6.60x10 <sup>-3</sup> | 4.81x10 <sup>-3</sup> | 1756/23336/287/301/358/477/5239/5348                                                          | 8     |  |
| CC                          | GO:0005819 | 'Spindle'                                                           | 13/227     | 318/18511 | 1.60x10 <sup>-4</sup>  | 6.89x10 <sup>-3</sup> | 5.02x10 <sup>-3</sup> | 1063/22974/259266/26112/332/4085/51203/6790/701/891/9055/983/991                              | 13    |  |
| CC                          | GO:0044449 | 'Contractile fiber part'                                            | 10/227     | 209/18511 | 2.66x10 <sup>-4</sup>  | 9.29x10 <sup>-3</sup> | 6.76x10 <sup>-3</sup> | 100820829/11346/171024/1756/23336/25802/287/5239/6711/7079                                    | 10    |  |

Table SII. Continued.

| A, GO functional enrichment |            |                                                    |            |           |                       |                       |                       |                                                                            |       |
|-----------------------------|------------|----------------------------------------------------|------------|-----------|-----------------------|-----------------------|-----------------------|----------------------------------------------------------------------------|-------|
| Ontology                    | ID         | Description                                        | Gene ratio | BgRatio   | P-value               | P.adjust              | q-value               | Gene ID                                                                    | Count |
| CC                          | GO:0000777 | 'Condensed chromosome kinetochore'                 | 7/227      | 103/18511 | 2.78x10 <sup>-4</sup> | 9.29x10 <sup>-3</sup> | 6.76x10 <sup>-3</sup> | 1063/11130/332/4085/701/79682/891                                          | 7     |
| CC                          | GO:0030016 | 'Myofibril'                                        | 10/227     | 213/18511 | 3.09x10 <sup>-4</sup> | 9.29x10 <sup>-3</sup> | 6.76x10 <sup>-3</sup> | 100820829/11346/171024/1756/23336/25802/287/5239/6711/7079                 | 10    |
| CC                          | GO:0014704 | 'Intercalated disc'                                | 5/227      | 50/18511  | 3.59x10 <sup>-4</sup> | 9.29x10 <sup>-3</sup> | 6.76x10 <sup>-3</sup> | 287/477/5239/5348/6330                                                     | 5     |
| CC                          | GO:0000940 | 'Condensed chromosome outer kinetochore'           | 3/227      | 12/18511  | 3.69x10 <sup>-4</sup> | 9.29x10 <sup>-3</sup> | 6.76x10 <sup>-3</sup> | 1063/701/891                                                               | 3     |
| CC                          | GO:0043292 | 'Contractile fiber'                                | 10/227     | 224/18511 | 4.60x10 <sup>-4</sup> | 1.07x10 <sup>-2</sup> | 7.79x10 <sup>-3</sup> | 100820829/11346/171024/1756/23336/25802/287/5239/6711/7079                 | 10    |
| CC                          | GO:0000922 | 'Spindle pole'                                     | 8/227      | 150/18511 | 5.35x10 <sup>-4</sup> | 1.15x10 <sup>-2</sup> | 8.41x10 <sup>-3</sup> | 1063/22974/259266/4085/6790/891/9055/991                                   | 8     |
| CC                          | GO:0030017 | 'Sarcomere'                                        | 9/227      | 192/18511 | 6.22x10 <sup>-4</sup> | 1.25x10 <sup>-2</sup> | 9.13x10 <sup>-3</sup> | 100820829/11346/171024/1756/25802/287/5239/6711/7079                       | 9     |
| CC                          | GO:0030864 | 'Cortical actin cytoskeleton'                      | 5/227      | 59/18511  | 7.75x10 <sup>-4</sup> | 1.46x10 <sup>-2</sup> | 1.07x10 <sup>-2</sup> | 100820829/130271/2934/54443/6711                                           | 5     |
| CC                          | GO:0005938 | 'Cell cortex'                                      | 10/227     | 247/18511 | 9.78x10 <sup>-4</sup> | 1.74x10 <sup>-2</sup> | 1.27x10 <sup>-2</sup> | 100820829/1300/130271/2934/53405/54443/6711/857/9590/9833                  | 10    |
| CC                          | GO:0000776 | 'Kinetochore'                                      | 7/227      | 133/18511 | 1.28x10 <sup>-3</sup> | 1.89x10 <sup>-2</sup> | 1.38x10 <sup>-2</sup> | 1063/11130/332/4085/701/79682/891                                          | 7     |
| CC                          | GO:0034358 | 'Plasma lipoprotein particle'                      | 4/227      | 39/18511  | 1.29x10 <sup>-3</sup> | 1.89x10 <sup>-2</sup> | 1.38x10 <sup>-2</sup> | 1191/338328/4023/6288                                                      | 4     |
| CC                          | GO:1990777 | 'Lipoprotein particle'                             | 4/227      | 39/18511  | 1.29x10 <sup>-3</sup> | 1.89x10 <sup>-2</sup> | 1.38x10 <sup>-2</sup> | 1191/338328/4023/6288                                                      | 4     |
| CC                          | GO:0000793 | 'Condensed chromosome'                             | 9/227      | 216/18511 | 1.43x10 <sup>-3</sup> | 1.89x10 <sup>-2</sup> | 1.38x10 <sup>-2</sup> | 1063/11130/332/4085/6790/701/7153/79682/891                                | 9     |
| CC                          | GO:0030055 | 'Cell-substrate junction'                          | 13/227     | 402/18511 | 1.44x10 <sup>-3</sup> | 1.89x10 <sup>-2</sup> | 1.38x10 <sup>-2</sup> | 10580/171024/1756/2273/2934/301/4162/4311/5239/7145/83660/857/9590         | 13    |
| CC                          | GO:0044291 | 'Cell-cell contact zone'                           | 5/227      | 68/18511  | 1.48x10 <sup>-3</sup> | 1.89x10 <sup>-2</sup> | 1.38x10 <sup>-2</sup> | 287/477/5239/5348/6330                                                     | 5     |
| CC                          | GO:0071682 | 'Endocytic vesicle lumen'                          | 3/227      | 19/18511  | 1.53x10 <sup>-3</sup> | 1.89x10 <sup>-2</sup> | 1.38x10 <sup>-2</sup> | 3039/3043/6288                                                             | 3     |
| CC                          | GO:0032994 | 'Protein-lipid complex'                            | 4/227      | 41/18511  | 1.56x10 <sup>-3</sup> | 1.89x10 <sup>-2</sup> | 1.38x10 <sup>-2</sup> | 1191/338328/4023/6288                                                      | 4     |
| CC                          | GO:0005680 | 'Anaphase-promoting complex'                       | 3/227      | 21/18511  | 2.06x10 <sup>-3</sup> | 2.39x10 <sup>-2</sup> | 1.74x10 <sup>-2</sup> | 11065/701/991                                                              | 3     |
| CC                          | GO:0043235 | 'Receptor complex'                                 | 11/227     | 325/18511 | 2.32x10 <sup>-3</sup> | 2.54x10 <sup>-2</sup> | 1.85x10 <sup>-2</sup> | 10580/130399/2690/3679/3953/3977/4881/4915/7018/7049/948                   | 11    |
| CC                          | GO:0000780 | 'Condensed nuclear chromosome, centromeric region' | 3/227      | 22/18511  | 2.36x10 <sup>-3</sup> | 2.54x10 <sup>-2</sup> | 1.85x10 <sup>-2</sup> | 6790/701/891                                                               | 3     |
| CC                          | GO:0000775 | 'Chromosome, centromeric region'                   | 8/227      | 191/18511 | 2.52x10 <sup>-3</sup> | 2.61x10 <sup>-2</sup> | 1.90x10 <sup>-2</sup> | 1063/11130/332/4085/6790/701/79682/891                                     | 8     |
| CC                          | GO:0098552 | 'Side of membrane'                                 | 14/227     | 482/18511 | 2.59x10 <sup>-3</sup> | 2.61x10 <sup>-2</sup> | 1.90x10 <sup>-2</sup> | 100820829/2774/2791/301/338328/3627/4162/5239/54331/6382/7018/7049/762/948 | 14    |
| CC                          | GO:0098797 | 'Plasma membrane protein complex'                  | 9/227      | 241/18511 | 3.00x10 <sup>-3</sup> | 2.85x10 <sup>-2</sup> | 2.08x10 <sup>-2</sup> | 1756/2706/2774/2791/3479/3679/5239/54331/7049                              | 9     |

Table SII. Continued.

| Ontology | ID         | Description                            | Gene ratio | BgRatio   | P-value               | P.adjust              | q-value               | Gene ID                                                                                  | Count |
|----------|------------|----------------------------------------|------------|-----------|-----------------------|-----------------------|-----------------------|------------------------------------------------------------------------------------------|-------|
| CC       | GO:0060205 | 'Cytoplasmic vesicle lumen'            | 11/227     | 338/18511 | 3.14x10 <sup>-3</sup> | 2.85x10 <sup>-2</sup> | 2.08x10 <sup>-2</sup> | 1191/1675/2934/3039/3043/3479/6286/6288/<br>7018/7123/7450                               | 11    |
| CC       | GO:0072686 | 'Mitotic spindle'                      | 5/227      | 81/18511  | 3.19x10 <sup>-3</sup> | 2.85x10 <sup>-2</sup> | 2.08x10 <sup>-2</sup> | 22974/259266/4085/6790/983                                                               | 5     |
| CC       | GO:0031983 | 'Vesicle lumen'                        | 11/227     | 339/18511 | 3.21x10 <sup>-3</sup> | 2.85x10 <sup>-2</sup> | 2.08x10 <sup>-2</sup> | 1191/1675/2934/3039/3043/3479/6286/6288/<br>7018/7123/7450                               | 11    |
| CC       | GO:0030018 | 'Z disc'                               | 6/227      | 119/18511 | 3.50x10 <sup>-3</sup> | 2.91x10 <sup>-2</sup> | 2.12x10 <sup>-2</sup> | 100820829/11346/171024/1756/287/5239                                                     | 6     |
| CC       | GO:0005925 | 'Focal adhesion'                       | 12/227     | 394/18511 | 3.54x10 <sup>-3</sup> | 2.91x10 <sup>-2</sup> | 2.12x10 <sup>-2</sup> | 10580/171024/2273/2934/301/4162/4311/<br>5239/7145/83660/857/9590                        | 12    |
| CC       | GO:0030496 | 'Midbody'                              | 7/227      | 160/18511 | 3.64x10 <sup>-3</sup> | 2.91x10 <sup>-2</sup> | 2.12x10 <sup>-2</sup> | 1063/259266/26112/332/6790/9055/983                                                      | 7     |
| CC       | GO:0005924 | 'Cell-substrate adherens junction'     | 12/227     | 397/18511 | 3.76x10 <sup>-3</sup> | 2.91x10 <sup>-2</sup> | 2.12x10 <sup>-2</sup> | 10580/171024/2273/2934/301/4162/4311/<br>5239/7145/83660/857/9590                        | 12    |
| CC       | GO:0005876 | 'Spindle microtubule'                  | 4/227      | 52/18511  | 3.76x10 <sup>-3</sup> | 2.91x10 <sup>-2</sup> | 2.12x10 <sup>-2</sup> | 51203/6790/9055/983                                                                      | 4     |
| CC       | GO:0030863 | 'Cortical cytoskeleton'                | 5/227      | 85/18511  | 3.93x10 <sup>-3</sup> | 2.97x10 <sup>-2</sup> | 2.16x10 <sup>-2</sup> | 100820829/130271/2934/54443/6711                                                         | 5     |
| CC       | GO:0045121 | 'Membrane raft'                        | 10/227     | 301/18511 | 4.14x10 <sup>-3</sup> | 2.98x10 <sup>-2</sup> | 2.17x10 <sup>-2</sup> | 10580/1756/1910/287/3991/477/5348/5519/<br>857/948                                       | 10    |
| CC       | GO:0098857 | 'Membrane microdomain'                 | 10/227     | 302/18511 | 4.23x10 <sup>-3</sup> | 2.98x10 <sup>-2</sup> | 2.17x10 <sup>-2</sup> | 10580/1756/1910/287/3991/477/5348/5519/<br>857/948                                       | 10    |
| CC       | GO:0034364 | 'High-density lipoprotein particle'    | 3/227      | 27/18511  | 4.28x10 <sup>-3</sup> | 2.98x10 <sup>-2</sup> | 2.17x10 <sup>-2</sup> | 1191/338328/6288                                                                         | 3     |
| CC       | GO:0015629 | 'Actin cytoskeleton'                   | 13/227     | 457/18511 | 4.35x10 <sup>-3</sup> | 2.98x10 <sup>-2</sup> | 2.17x10 <sup>-2</sup> | 100820829/10580/11346/130271/171024/<br>25802/27129/2934/5239/53405/54443/6711/<br>83660 | 13    |
| CC       | GO:0005581 | 'Collagen trimer'                      | 5/227      | 88/18511  | 4.56x10 <sup>-3</sup> | 3.06x10 <sup>-2</sup> | 2.23x10 <sup>-2</sup> | 1300/1301/131873/342035/9370                                                             | 5     |
| CC       | GO:0099568 | 'Cytoplasmic region'                   | 10/227     | 309/18511 | 4.96x10 <sup>-3</sup> | 3.22x10 <sup>-2</sup> | 2.35x10 <sup>-2</sup> | 100820829/1300/130271/2934/53405/54443/<br>6711/857/9590/9833                            | 10    |
| CC       | GO:0031091 | 'Platelet alpha granule'               | 5/227      | 90/18511  | 5.01x10 <sup>-3</sup> | 3.22x10 <sup>-2</sup> | 2.35x10 <sup>-2</sup> | 1191/1675/3479/7450/948                                                                  | 5     |
| CC       | GO:0016328 | 'Lateral plasma membrane'              | 4/227      | 57/18511  | 5.23x10 <sup>-3</sup> | 3.29x10 <sup>-2</sup> | 2.40x10 <sup>-2</sup> | 1365/1756/2706/301                                                                       | 4     |
| CC       | GO:0031674 | 'I band'                               | 6/227      | 132/18511 | 5.79x10 <sup>-3</sup> | 3.57x10 <sup>-2</sup> | 2.60x10 <sup>-2</sup> | 100820829/11346/171024/1756/287/5239                                                     | 6     |
| CC       | GO:0009897 | 'External side of plasma membrane'     | 9/227      | 270/18511 | 6.26x10 <sup>-3</sup> | 3.62x10 <sup>-2</sup> | 2.64x10 <sup>-2</sup> | 301/338328/3627/4162/6382/7018/7049/<br>762/948                                          | 9     |
| CC       | GO:0031461 | 'Cullin-RING ubiquitin ligase complex' | 7/227      | 177/18511 | 6.29x10 <sup>-3</sup> | 3.62x10 <sup>-2</sup> | 2.64x10 <sup>-2</sup> | 11065/114818/1164/401265/51514/701/991                                                   | 7     |
| CC       | GO:0070938 | 'Contractile ring'                     | 2/227      | 10/18511  | 6.31x10 <sup>-3</sup> | 3.62x10 <sup>-2</sup> | 2.64x10 <sup>-2</sup> | 54443/9055                                                                               | 2     |
| CC       | GO:0051233 | 'Spindle midzone'                      | 3/227      | 31/18511  | 6.35x10 <sup>-3</sup> | 3.62x10 <sup>-2</sup> | 2.64x10 <sup>-2</sup> | 26112/6790/701                                                                           | 3     |
| CC       | GO:0098589 | 'Membrane region'                      | 11/227     | 378/18511 | 7.16x10 <sup>-3</sup> | 4.01x10 <sup>-2</sup> | 2.92x10 <sup>-2</sup> | 10580/1756/1910/287/3991/477/5348/5519/<br>7018/857/948                                  | 11    |
| CC       | GO:1902911 | 'Protein kinase complex'               | 5/227      | 99/18511  | 7.47x10 <sup>-3</sup> | 4.06x10 <sup>-2</sup> | 2.95x10 <sup>-2</sup> | 10580/1164/130399/891/983                                                                | 5     |

Table S11. Continued.

| A, GO functional enrichment |            |                                                                                                                                                                        |            |           |                       |                       |                       |                                                                |       |
|-----------------------------|------------|------------------------------------------------------------------------------------------------------------------------------------------------------------------------|------------|-----------|-----------------------|-----------------------|-----------------------|----------------------------------------------------------------|-------|
| Ontology                    | ID         | Description                                                                                                                                                            | Gene ratio | BgRatio   | P-value               | P.adjust              | q-value               | Gene ID                                                        | Count |
| CC                          | GO:0000778 | 'Condensed nuclear chromosome kinetochore'                                                                                                                             | 2/227      | 11/18511  | 7.66x10 <sup>-3</sup> | 4.06x10 <sup>-2</sup> | 2.95x10 <sup>-2</sup> | 701/891                                                        | 2     |
| CC                          | GO:0005890 | 'Sodium:potassium-exchanging ATPase complex'                                                                                                                           | 2/227      | 11/18511  | 7.66x10 <sup>-3</sup> | 4.06x10 <sup>-2</sup> | 2.95x10 <sup>-2</sup> | 477/5348                                                       | 2     |
| CC                          | GO:0005833 | 'Hemoglobin complex'                                                                                                                                                   | 2/227      | 12/18511  | 9.11x10 <sup>-3</sup> | 4.73x10 <sup>-2</sup> | 3.44x10 <sup>-2</sup> | 3039/3043                                                      | 2     |
| CC                          | GO:0031093 | 'Platelet alpha granule lumen'                                                                                                                                         | 4/227      | 67/18511  | 9.24x10 <sup>-3</sup> | 4.73x10 <sup>-2</sup> | 3.44x10 <sup>-2</sup> | 1191/1675/3479/7450                                            | 4     |
| CC                          | GO:0005834 | 'Heterotrimeric G-protein complex'                                                                                                                                     | 3/227      | 36/18511  | 9.65x10 <sup>-3</sup> | 4.78x10 <sup>-2</sup> | 3.48x10 <sup>-2</sup> | 2774/2791/54331                                                | 3     |
| CC                          | GO:1905360 | 'GTPase complex'                                                                                                                                                       | 3/227      | 36/18511  | 9.65x10 <sup>-3</sup> | 4.78x10 <sup>-2</sup> | 3.48x10 <sup>-2</sup> | 2774/2791/54331                                                | 3     |
| CC                          | GO:0016324 | 'Apical plasma membrane'                                                                                                                                               | 9/227      | 292/18511 | 1.02x10 <sup>-2</sup> | 4.96x10 <sup>-2</sup> | 3.61x10 <sup>-2</sup> | 146894/287/301/338328/358/5348/7018/762/948                    | 9     |
| MF                          | GO:0008201 | 'Heparin binding'                                                                                                                                                      | 10/206     | 160/17354 | 2.17x10 <sup>-5</sup> | 5.41x10 <sup>-3</sup> | 4.77x10 <sup>-3</sup> | 10631/11096/26577/3627/4023/6288/7049/7123/84870/8840          | 10    |
| MF                          | GO:1901681 | 'Sulfur compound binding'                                                                                                                                              | 12/206     | 232/17354 | 2.20x10 <sup>-5</sup> | 5.41x10 <sup>-3</sup> | 4.77x10 <sup>-3</sup> | 10631/11096/26577/2719/32/3627/4023/6288/7049/7123/84870/8840  | 12    |
| MF                          | GO:0005539 | 'Glycosaminoglycan binding'                                                                                                                                            | 11/206     | 213/17354 | 4.93x10 <sup>-5</sup> | 6.34x10 <sup>-3</sup> | 5.59x10 <sup>-3</sup> | 10631/10894/11096/26577/3627/4023/6288/7049/7123/84870/8840    | 11    |
| MF                          | GO:0033218 | 'Amide binding'                                                                                                                                                        | 13/206     | 294/17354 | 5.17x10 <sup>-5</sup> | 6.34x10 <sup>-3</sup> | 5.59x10 <sup>-3</sup> | 1191/1910/2690/30819/32/3624/4311/4881/5468/7298/8322/9452/948 | 13    |
| MF                          | GO:0019838 | 'Growth factor binding'                                                                                                                                                | 8/206      | 130/17354 | 1.62x10 <sup>-4</sup> | 1.59x10 <sup>-2</sup> | 1.40x10 <sup>-2</sup> | 130399/152831/3489/3977/4915/7049/8840/948                     | 8     |
| MF                          | GO:0042277 | 'Peptide binding'                                                                                                                                                      | 11/206     | 260/17354 | 2.86x10 <sup>-4</sup> | 2.29x10 <sup>-2</sup> | 2.02x10 <sup>-2</sup> | 1191/1910/2690/30819/3624/4311/4881/5468/8322/9452/948         | 11    |
| MF                          | GO:0031406 | 'Carboxylic acid binding'                                                                                                                                              | 9/206      | 184/17354 | 3.59x10 <sup>-4</sup> | 2.29x10 <sup>-2</sup> | 2.02x10 <sup>-2</sup> | 10894/1645/1646/2167/32/5105/5468/7298/9370                    | 9     |
| MF                          | GO:0043177 | 'Organic acid binding'                                                                                                                                                 | 9/206      | 185/17354 | 3.73x10 <sup>-4</sup> | 2.29x10 <sup>-2</sup> | 2.02x10 <sup>-2</sup> | 10894/1645/1646/2167/32/5105/5468/7298/9370                    | 9     |
| MF                          | GO:0033293 | 'Monocarboxylic acid binding'                                                                                                                                          | 5/206      | 58/17354  | 6.17x10 <sup>-4</sup> | 3.02x10 <sup>-2</sup> | 2.66x10 <sup>-2</sup> | 1645/1646/2167/32/5468                                         | 5     |
| MF                          | GO:0016709 | 'Oxidoreductase activity, acting on paired donors, with incorporation or reduction of molecular oxygen, NAD(P)H as one donor, and incorporation of one atom of oxygen' | 4/206      | 34/17354  | 6.77x10 <sup>-4</sup> | 3.02x10 <sup>-2</sup> | 2.66x10 <sup>-2</sup> | 1645/1646/2327/6713                                            | 4     |
| MF                          | GO:0017046 | 'Peptide hormone binding'                                                                                                                                              | 4/206      | 34/17354  | 6.77x10 <sup>-4</sup> | 3.02x10 <sup>-2</sup> | 2.66x10 <sup>-2</sup> | 1910/2690/3624/4881                                            | 4     |
| MF                          | GO:0035173 | 'Histone kinase activity'                                                                                                                                              | 3/206      | 17/17354  | 9.91x10 <sup>-4</sup> | 3.93x10 <sup>-2</sup> | 3.46x10 <sup>-2</sup> | 6790/891/983                                                   | 3     |
| MF                          | GO:0042562 | 'Hormone binding'                                                                                                                                                      | 5/206      | 65/17354  | 1.04x10 <sup>-3</sup> | 3.93x10 <sup>-2</sup> | 3.46x10 <sup>-2</sup> | 1910/2690/3624/477/4881                                        | 5     |

Table SII. Continued.

| Ontology | ID       | Description                               | Gene ratio | BgRatio  | P-value               | P.adjust              | q-value               | Gene ID                                                | Count |
|----------|----------|-------------------------------------------|------------|----------|-----------------------|-----------------------|-----------------------|--------------------------------------------------------|-------|
| N/A      | hsa03320 | 'PPAR signaling pathway'                  | 10/111     | 74/7440  | 1.17x10 <sup>-7</sup> | 2.21x10 <sup>-5</sup> | 2.04x10 <sup>-5</sup> | 10580/2167/364/4023/5105/5346/5468/<br>729359/9370/948 | 10    |
| N/A      | hsa04152 | 'AMPK signaling pathway'                  | 10/111     | 120/7440 | 1.07x10 <sup>-5</sup> | 1.01x10 <sup>-3</sup> | 9.29x10 <sup>-4</sup> | 32/3479/3952/3953/3991/5105/5468/5519/<br>9370/948     | 10    |
| N/A      | hsa04114 | 'Oocyte meiosis'                          | 9/111      | 124/7440 | 8.97x10 <sup>-5</sup> | 5.62x10 <sup>-3</sup> | 5.20x10 <sup>-3</sup> | 3479/4085/5519/6790/891/9133/9232/<br>983/991          | 9     |
| N/A      | hsa04923 | 'Regulation of lipolysis in adipocytes'   | 6/111      | 54/7440  | 1.39x10 <sup>-4</sup> | 6.53x10 <sup>-3</sup> | 6.03x10 <sup>-3</sup> | 2167/364/3991/4881/5140/5346                           | 6     |
| N/A      | hsa04964 | 'Proximal tubule bicarbonate reclamation' | 4/111      | 23/7440  | 3.34x10 <sup>-4</sup> | 1.26x10 <sup>-2</sup> | 1.16x10 <sup>-2</sup> | 358/477/5105/762                                       | 4     |
| N/A      | hsa04110 | 'Cell cycle'                              | 8/111      | 124/7440 | 5.00x10 <sup>-4</sup> | 1.44x10 <sup>-2</sup> | 1.33x10 <sup>-2</sup> | 1028/4085/701/891/9133/9232/983/991                    | 8     |
| N/A      | hsa04920 | 'Adipocytokine signaling pathway'         | 6/111      | 69/7440  | 5.38x10 <sup>-4</sup> | 1.44x10 <sup>-2</sup> | 1.33x10 <sup>-2</sup> | 32/3952/3953/5105/9370/948                             | 6     |
| N/A      | hsa04914 | 'Progesterone-mediated oocyte maturation' | 7/111      | 99/7440  | 6.55x10 <sup>-4</sup> | 1.54x10 <sup>-2</sup> | 1.42x10 <sup>-2</sup> | 3479/4085/5140/6790/891/9133/983                       | 7     |
| N/A      | hsa05144 | 'Malaria'                                 | 5/111      | 49/7440  | 7.63x10 <sup>-4</sup> | 1.59x10 <sup>-2</sup> | 1.47x10 <sup>-2</sup> | 2532/3039/3043/6382/948                                | 5     |
| N/A      | hsa04512 | 'ECM-receptor interaction'                | 6/111      | 82/7440  | 1.34x10 <sup>-3</sup> | 2.53x10 <sup>-2</sup> | 2.33x10 <sup>-2</sup> | 131873/3679/6382/6696/7450/948                         | 6     |
| N/A      | hsa00360 | 'Phenylalanine metabolism'                | 3/111      | 17/7440  | 1.89x10 <sup>-3</sup> | 3.00x10 <sup>-2</sup> | 2.77x10 <sup>-2</sup> | 10249/4128/8639                                        | 3     |
| N/A      | hsa00350 | 'Tyrosine metabolism'                     | 4/111      | 36/7440  | 1.91x10 <sup>-3</sup> | 3.00x10 <sup>-2</sup> | 2.77x10 <sup>-2</sup> | 125/126/4128/8639                                      | 4     |

GO, Gene Ontology; KEGG, Kyoto Encyclopedia of Genes and Genomes; BP, biological process; CC, cellular component; MF, molecular function; N/A, not available; PPAR, peroxisome proliferator-activated receptor; AMPK, 5' adenosine monophosphate-activated protein kinase; ECM, extracellular matrix; cAMP, cyclic adenosine 3',5'-monophosphate; RING, ring finger protein; NAD(P)H, nicotinamide-adenine dinucleotide phosphate.

Table SIII. GO functional enrichment and KEGG pathway enrichment of the 15 hub genes.

| A, GO functional enrichment |            |                                                                                    |            |           |                        |                        |                        |                                                                    |       |
|-----------------------------|------------|------------------------------------------------------------------------------------|------------|-----------|------------------------|------------------------|------------------------|--------------------------------------------------------------------|-------|
| Ontology                    | ID         | Description                                                                        | Gene ratio | BgRatio   | P-value                | Padjust                | q-value                | Gene ID                                                            | Count |
| BP                          | GO:0000280 | 'Nuclear division'                                                                 | 12/15      | 393/17381 | 6.47x10 <sup>-18</sup> | 1.66x10 <sup>-15</sup> | 5.87x10 <sup>-16</sup> | 1063/11065/11130/22974/<br>332/6790/701/7153/891/<br>9055/9232/991 | 12    |
| BP                          | GO:0140014 | 'Mitotic nuclear division'                                                         | 11/15      | 253/17381 | 6.49x10 <sup>-18</sup> | 1.66x10 <sup>-15</sup> | 5.87x10 <sup>-16</sup> | 1063/11065/11130/22974/<br>332/6790/701/891/9055/<br>9232/991      | 11    |
| BP                          | GO:0048285 | 'Organelle fission'                                                                | 12/15      | 439/17381 | 2.47x10 <sup>-17</sup> | 4.21x10 <sup>-15</sup> | 1.49x10 <sup>-15</sup> | 1063/11065/11130/22974/<br>332/6790/701/7153/891/<br>9055/9232/991 | 12    |
| BP                          | GO:0000819 | 'Sister chromatid segregation'                                                     | 10/15      | 230/17381 | 3.84x10 <sup>-16</sup> | 4.90x10 <sup>-14</sup> | 1.74x10 <sup>-14</sup> | 1063/11065/11130/332/701/<br>7153/891/9055/9232/991                | 10    |
| BP                          | GO:0098813 | 'Nuclear chromosome segregation'                                                   | 10/15      | 297/17381 | 5.08x10 <sup>-15</sup> | 5.19x10 <sup>-13</sup> | 1.84x10 <sup>-13</sup> | 1063/11065/11130/332/701/<br>7153/891/9055/9232/991                | 10    |
| BP                          | GO:0007059 | 'Chromosome segregation'                                                           | 10/15      | 346/17381 | 2.36x10 <sup>-14</sup> | 2.01x10 <sup>-12</sup> | 7.13x10 <sup>-13</sup> | 1063/11065/11130/332/701/<br>7153/891/9055/9232/991                | 10    |
| BP                          | GO:0000070 | 'Mitotic sister chromatid segregation'                                             | 8/15       | 142/17381 | 9.97x10 <sup>-14</sup> | 7.28x10 <sup>-12</sup> | 2.58x10 <sup>-12</sup> | 1063/11065/11130/701/891/<br>9055/9232/991                         | 8     |
| BP                          | GO:0031145 | 'Anaphase-promoting complex-dependent catabolic process'                           | 7/15       | 80/17381  | 2.09x10 <sup>-13</sup> | 1.34x10 <sup>-11</sup> | 4.73x10 <sup>-12</sup> | 11065/6790/701/891/9232/<br>983/991                                | 7     |
| BP                          | GO:0051304 | 'Chromosome separation'                                                            | 6/15       | 75/17381  | 2.55x10 <sup>-11</sup> | 1.45x10 <sup>-9</sup>  | 5.14x10 <sup>-10</sup> | 1063/11065/701/7153/891/<br>9232                                   | 6     |
| BP                          | GO:0007093 | 'Mitotic cell cycle checkpoint'                                                    | 7/15       | 161/17381 | 3.10x10 <sup>-11</sup> | 1.59x10 <sup>-9</sup>  | 5.62x10 <sup>-10</sup> | 1063/11130/6790/701/7153/<br>891/983                               | 7     |
| BP                          | GO:0045930 | 'Negative regulation of mitotic cell cycle'                                        | 8/15       | 305/17381 | 4.75x10 <sup>-11</sup> | 2.20x10 <sup>-9</sup>  | 7.81x10 <sup>-10</sup> | 1063/11130/6790/701/7153/<br>891/9232/983                          | 8     |
| BP                          | GO:0051783 | 'Regulation of nuclear division'                                                   | 7/15       | 181/17381 | 7.09x10 <sup>-11</sup> | 3.02x10 <sup>-9</sup>  | 1.07x10 <sup>-9</sup>  | 1063/11065/6790/701/891/<br>9232/991                               | 7     |
| BP                          | GO:0007052 | 'Mitotic spindle organization'                                                     | 6/15       | 102/17381 | 1.69x10 <sup>-10</sup> | 6.63x10 <sup>-9</sup>  | 2.35x10 <sup>-9</sup>  | 22974/332/6790/891/9055/<br>991                                    | 6     |
| BP                          | GO:0042787 | 'Protein ubiquitination involved in ubiquitin-dependent protein catabolic process' | 7/15       | 214/17381 | 2.30x10 <sup>-10</sup> | 8.40x10 <sup>-9</sup>  | 2.98x10 <sup>-9</sup>  | 11065/6790/701/891/9232/<br>983/991                                | 7     |
| BP                          | GO:0000075 | 'Cell cycle checkpoint'                                                            | 7/15       | 225/17381 | 3.27x10 <sup>-10</sup> | 1.11x10 <sup>-8</sup>  | 3.95x10 <sup>-9</sup>  | 1063/11130/6790/701/7153/<br>891/983                               | 7     |
| BP                          | GO:0010965 | 'Regulation of mitotic sister chromatid separation'                                | 5/15       | 50/17381  | 4.71x10 <sup>-10</sup> | 1.51x10 <sup>-8</sup>  | 5.33x10 <sup>-9</sup>  | 1063/11065/701/891/9232                                            | 5     |

Table SIII. Continued.

| Ontology | ID         | Description                                                                                                        | Gene ratio | BgRatio   | P-value                | Padjust               | q-value               | Gene ID                               | Count |
|----------|------------|--------------------------------------------------------------------------------------------------------------------|------------|-----------|------------------------|-----------------------|-----------------------|---------------------------------------|-------|
| BP       | GO:1902850 | 'Microtubule cytoskeleton organization involved in mitosis'                                                        | 6/15       | 122/17381 | $5.02 \times 10^{-10}$ | $1.51 \times 10^{-8}$ | $5.35 \times 10^{-9}$ | 22974/332/6790/891/9055/991           | 6     |
| BP       | GO:1901990 | 'Regulation of mitotic cell transition'                                                                            | 8/15       | 417/17381 | $5.70 \times 10^{-10}$ | $1.55 \times 10^{-8}$ | $5.50 \times 10^{-9}$ | 1063/11065/22974/6790/701/891/983/991 | 8     |
| BP       | GO:0051306 | 'Mitotic sister chromatid separation'                                                                              | 5/15       | 52/17381  | $5.78 \times 10^{-10}$ | $1.55 \times 10^{-8}$ | $5.50 \times 10^{-9}$ | 1063/11065/701/891/9232               | 5     |
| BP       | GO:1905818 | 'Regulation of chromosome separation'                                                                              | 5/15       | 54/17381  | $7.02 \times 10^{-10}$ | $1.79 \times 10^{-8}$ | $6.36 \times 10^{-9}$ | 1063/11065/701/891/9232               | 5     |
| BP       | GO:1901987 | 'Regulation of cell cycle phase transition'                                                                        | 8/15       | 446/17381 | $9.71 \times 10^{-10}$ | $2.36 \times 10^{-8}$ | $8.37 \times 10^{-9}$ | 1063/11065/22974/6790/701/891/983/991 | 8     |
| BP       | GO:0033047 | 'Regulation of mitotic sister chromatid segregation'                                                               | 5/15       | 60/17381  | $1.21 \times 10^{-9}$  | $2.81 \times 10^{-8}$ | $9.95 \times 10^{-9}$ | 1063/11065/701/891/9232               | 5     |
| BP       | GO:0007051 | 'Spindle organization'                                                                                             | 6/15       | 157/17381 | $2.31 \times 10^{-9}$  | $4.92 \times 10^{-8}$ | $1.74 \times 10^{-8}$ | 22974/332/6790/891/9055/991           | 6     |
| BP       | GO:0007088 | 'Regulation of mitotic nuclear division'                                                                           | 6/15       | 157/17381 | $2.31 \times 10^{-9}$  | $4.92 \times 10^{-8}$ | $1.74 \times 10^{-8}$ | 1063/11065/6790/701/891/9232          | 6     |
| BP       | GO:0033045 | 'Regulation of sister chromatid segregation'                                                                       | 5/15       | 71/17381  | $2.87 \times 10^{-9}$  | $5.64 \times 10^{-8}$ | $2.00 \times 10^{-8}$ | 1063/11065/701/891/9232               | 5     |
| BP       | GO:0051436 | 'Negative regulation of ubiquitin-protein ligase activity involved in mitotic cell cycle'                          | 5/15       | 71/17381  | $2.87 \times 10^{-9}$  | $5.64 \times 10^{-8}$ | $2.00 \times 10^{-8}$ | 11065/701/891/983/991                 | 5     |
| BP       | GO:0051439 | 'Regulation of ubiquitin-protein ligase activity involved in mitotic cell cycle'                                   | 5/15       | 72/17381  | $3.08 \times 10^{-9}$  | $5.83 \times 10^{-8}$ | $2.07 \times 10^{-8}$ | 11065/701/891/983/991                 | 5     |
| BP       | GO:0051437 | 'Positive regulation of ubiquitin-protein ligase activity involved in regulation of mitotic cell cycle transition' | 5/15       | 76/17381  | $4.06 \times 10^{-9}$  | $7.41 \times 10^{-8}$ | $2.62 \times 10^{-8}$ | 11065/701/891/983/991                 | 5     |
| BP       | GO:1904667 | 'Negative regulation of ubiquitin protein ligase activity'                                                         | 5/15       | 77/17381  | $4.34 \times 10^{-9}$  | $7.64 \times 10^{-8}$ | $2.71 \times 10^{-8}$ | 11065/701/891/983/991                 | 5     |
| BP       | GO:1903052 | 'Positive regulation of proteolysis involved in cellular protein catabolic process'                                | 6/15       | 185/17381 | $6.20 \times 10^{-9}$  | $1.06 \times 10^{-7}$ | $3.74 \times 10^{-8}$ | 11065/6790/701/891/983/991            | 6     |
| BP       | GO:0051444 | 'Negative regulation of ubiquitin-protein transferase activity'                                                    | 5/15       | 84/17381  | $6.76 \times 10^{-9}$  | $1.08 \times 10^{-7}$ | $3.82 \times 10^{-8}$ | 11065/701/891/983/991                 | 5     |
| BP       | GO:1904668 | 'Positive regulation of ubiquitin protein ligase activity'                                                         | 5/15       | 84/17381  | $6.76 \times 10^{-9}$  | $1.08 \times 10^{-7}$ | $3.82 \times 10^{-8}$ | 11065/701/891/983/991                 | 5     |
| BP       | GO:2000060 | 'Positive regulation of protein ubiquitination involved in ubiquitin-dependent protein catabolic process'          | 5/15       | 91/17381  | $1.01 \times 10^{-8}$  | $1.57 \times 10^{-7}$ | $5.55 \times 10^{-8}$ | 11065/701/891/983/991                 | 5     |

Table SIII. Continued.

| Ontology | ID         | Description                                                                                      | Gene ratio | BgRatio   | P-value               | Padjust               | q-value               | Gene ID                         | Count |
|----------|------------|--------------------------------------------------------------------------------------------------|------------|-----------|-----------------------|-----------------------|-----------------------|---------------------------------|-------|
| BP       | GO:1903364 | 'Positive regulation of cellular protein catabolic process'                                      | 6/15       | 202/17381 | $1.05 \times 10^{-8}$ | $1.57 \times 10^{-7}$ | $5.55 \times 10^{-8}$ | 11065/6790/701/891/983/991      | 6     |
| BP       | GO:1904666 | 'Regulation of ubiquitin protein ligase activity'                                                | 5/15       | 92/17381  | $1.07 \times 10^{-8}$ | $1.57 \times 10^{-7}$ | $5.55 \times 10^{-8}$ | 11065/701/891/983/991           | 5     |
| BP       | GO:0051983 | 'Regulation of chromosome segregation'                                                           | 5/15       | 95/17381  | $1.26 \times 10^{-8}$ | $1.79 \times 10^{-7}$ | $6.34 \times 10^{-8}$ | 1063/11065/701/891/9232         | 5     |
| BP       | GO:0043161 | 'Proteasome-mediated ubiquitin-dependent protein catabolic process'                              | 7/15       | 387/17381 | $1.42 \times 10^{-8}$ | $1.96 \times 10^{-7}$ | $6.94 \times 10^{-8}$ | 11065/6790/701/891/9232/983/991 | 7     |
| BP       | GO:2000816 | 'Negative regulation of mitotic sister chromatid separation'                                     | 4/15       | 34/17381  | $1.64 \times 10^{-8}$ | $2.21 \times 10^{-7}$ | $7.81 \times 10^{-8}$ | 1063/701/891/9232               | 4     |
| BP       | GO:1905819 | 'Negative regulation of chromosome separation'                                                   | 4/15       | 35/17381  | $1.85 \times 10^{-8}$ | $2.43 \times 10^{-7}$ | $8.59 \times 10^{-8}$ | 1063/701/891/9232               | 4     |
| BP       | GO:0051443 | 'Positive regulation of ubiquitin-protein transferase activity'                                  | 5/15       | 104/17381 | $1.99 \times 10^{-8}$ | $2.55 \times 10^{-7}$ | $9.02 \times 10^{-8}$ | 11065/701/891/983/991           | 5     |
| BP       | GO:2000058 | 'Regulation of protein ubiquitination involved in ubiquitin-dependent protein catabolic process' | 5/15       | 106/17381 | $2.19 \times 10^{-8}$ | $2.73 \times 10^{-7}$ | $9.69 \times 10^{-8}$ | 11065/701/891/983/991           | 5     |
| BP       | GO:0033048 | 'Negative regulation of mitotic sister chromatid segregation'                                    | 4/15       | 37/17381  | $2.33 \times 10^{-8}$ | $2.84 \times 10^{-7}$ | $1.01 \times 10^{-7}$ | 1063/701/891/9232               | 4     |
| BP       | GO:0033046 | 'Negative regulation of sister chromatid segregation'                                            | 4/15       | 39/17381  | $2.90 \times 10^{-8}$ | $3.45 \times 10^{-7}$ | $1.22 \times 10^{-7}$ | 1063/701/891/9232               | 4     |
| BP       | GO:0051321 | 'Meiotic cell cycle'                                                                             | 6/15       | 241/17381 | $3.01 \times 10^{-8}$ | $3.50 \times 10^{-7}$ | $1.24 \times 10^{-7}$ | 6790/701/7153/9232/983/991      | 6     |
| BP       | GO:0051985 | 'Negative regulation of chromosome segregation'                                                  | 4/15       | 40/17381  | $3.22 \times 10^{-8}$ | $3.64 \times 10^{-7}$ | $1.29 \times 10^{-7}$ | 1063/701/891/9232               | 4     |
| BP       | GO:0010498 | 'Proteasomal protein catabolic process'                                                          | 7/15       | 437/17381 | $3.27 \times 10^{-8}$ | $3.64 \times 10^{-7}$ | $1.29 \times 10^{-7}$ | 11065/6790/701/891/9232/983/991 | 7     |
| BP       | GO:0000086 | 'G2/M transition of mitotic cell cycle'                                                          | 6/15       | 248/17381 | $3.57 \times 10^{-8}$ | $3.88 \times 10^{-7}$ | $1.38 \times 10^{-7}$ | 1063/22974/6790/891/9133/983    | 6     |
| BP       | GO:0044839 | 'Cell cycle G2/M phase transition'                                                               | 6/15       | 257/17381 | $4.41 \times 10^{-8}$ | $4.60 \times 10^{-7}$ | $1.63 \times 10^{-7}$ | 1063/22974/6790/891/9133/983    | 6     |
| BP       | GO:1903050 | 'Regulation of proteolysis involved in cellular protein catabolic process'                       | 6/15       | 257/17381 | $4.41 \times 10^{-8}$ | $4.60 \times 10^{-7}$ | $1.63 \times 10^{-7}$ | 11065/6790/701/891/983/991      | 6     |
| BP       | GO:0051438 | 'Regulation of ubiquitin-protein transferase activity'                                           | 5/15       | 124/17381 | $4.83 \times 10^{-8}$ | $4.84 \times 10^{-7}$ | $1.72 \times 10^{-7}$ | 11065/701/891/983/991           | 5     |
| BP       | GO:2001251 | 'Negative regulation of chromosome organization'                                                 | 5/15       | 124/17381 | $4.83 \times 10^{-8}$ | $4.84 \times 10^{-7}$ | $1.72 \times 10^{-7}$ | 1063/701/7153/891/9232          | 5     |
| BP       | GO:0030071 | 'Regulation of mitotic metaphase/anaphase transition'                                            | 4/15       | 45/17381  | $5.24 \times 10^{-8}$ | $5.15 \times 10^{-7}$ | $1.82 \times 10^{-7}$ | 1063/11065/701/891              | 4     |

Table SIII. Continued.

| A, GO functional enrichment |            |                                                                                       |            |           |                       |                       |                       |                                 |       |
|-----------------------------|------------|---------------------------------------------------------------------------------------|------------|-----------|-----------------------|-----------------------|-----------------------|---------------------------------|-------|
| Ontology                    | ID         | Description                                                                           | Gene ratio | BgRatio   | P-value               | Padjust               | q-value               | Gene ID                         | Count |
| BP                          | GO:0000226 | 'Microtubule cytoskeleton organization'                                               | 7/15       | 472/17381 | $5.55 \times 10^{-8}$ | $5.33 \times 10^{-7}$ | $1.89 \times 10^{-7}$ | 22974/332/6790/891/9055/983/991 | 7     |
| BP                          | GO:0045732 | 'Positive regulation of protein catabolic process'                                    | 6/15       | 268/17381 | $5.66 \times 10^{-8}$ | $5.33 \times 10^{-7}$ | $1.89 \times 10^{-7}$ | 11065/6790/701/891/983/991      | 6     |
| BP                          | GO:1902099 | 'Regulation of metaphase/anaphase transition of cell cycle'                           | 4/15       | 46/17381  | $5.74 \times 10^{-8}$ | $5.33 \times 10^{-7}$ | $1.89 \times 10^{-7}$ | 1063/11065/701/891              | 4     |
| BP                          | GO:0007091 | 'Metaphase/anaphase transition of mitotic cell cycle'                                 | 4/15       | 47/17381  | $6.27 \times 10^{-8}$ | $5.62 \times 10^{-7}$ | $1.99 \times 10^{-7}$ | 1063/11065/701/891              | 4     |
| BP                          | GO:0045839 | 'Negative regulation of mitotic nuclear division'                                     | 4/15       | 47/17381  | $6.27 \times 10^{-8}$ | $5.62 \times 10^{-7}$ | $1.99 \times 10^{-7}$ | 1063/701/891/9232               | 4     |
| BP                          | GO:0044784 | 'Metaphase/anaphase transition of cell cycle'                                         | 4/15       | 48/17381  | $6.83 \times 10^{-8}$ | $5.95 \times 10^{-7}$ | $2.11 \times 10^{-7}$ | 1063/11065/701/891              | 4     |
| BP                          | GO:0007062 | 'Sister chromatid cohesion'                                                           | 5/15       | 133/17381 | $6.87 \times 10^{-8}$ | $5.95 \times 10^{-7}$ | $2.11 \times 10^{-7}$ | 1063/11130/332/701/991          | 5     |
| BP                          | GO:1903362 | 'Regulation of cellular protein catabolic process'                                    | 6/15       | 285/17381 | $8.15 \times 10^{-8}$ | $6.94 \times 10^{-7}$ | $2.46 \times 10^{-7}$ | 11065/6790/701/891/983/991      | 6     |
| BP                          | GO:0031397 | 'Negative regulation of protein ubiquitination'                                       | 5/15       | 139/17381 | $8.57 \times 10^{-8}$ | $7.18 \times 10^{-7}$ | $2.54 \times 10^{-7}$ | 11065/701/891/983/991           | 5     |
| BP                          | GO:0033044 | 'Regulation of chromosome organization'                                               | 6/15       | 301/17381 | $1.13 \times 10^{-7}$ | $9.28 \times 10^{-7}$ | $3.29 \times 10^{-7}$ | 1063/11065/701/7153/891/9232    | 6     |
| BP                          | GO:1903321 | 'Negative regulation of protein modification by small protein conjugation or removal' | 5/15       | 150/17381 | $1.25 \times 10^{-7}$ | $1.02 \times 10^{-6}$ | $3.60 \times 10^{-7}$ | 11065/701/891/983/991           | 5     |
| BP                          | GO:0051784 | 'Negative regulation of nuclear division'                                             | 4/15       | 58/17381  | $1.48 \times 10^{-7}$ | $1.18 \times 10^{-6}$ | $4.19 \times 10^{-7}$ | 1063/701/891/9232               | 4     |
| BP                          | GO:0010948 | 'Negative regulation of cell cycle process'                                           | 6/15       | 328/17381 | $1.87 \times 10^{-7}$ | $1.47 \times 10^{-6}$ | $5.21 \times 10^{-7}$ | 1063/6790/701/891/9232/983      | 6     |
| BP                          | GO:0140013 | 'Meiotic nuclear division'                                                            | 5/15       | 171/17381 | $2.41 \times 10^{-7}$ | $1.87 \times 10^{-6}$ | $6.61 \times 10^{-7}$ | 6790/701/7153/9232/991          | 5     |
| BP                          | GO:0031398 | 'Positive regulation of protein ubiquitination'                                       | 5/15       | 183/17381 | $3.38 \times 10^{-7}$ | $2.54 \times 10^{-6}$ | $8.99 \times 10^{-7}$ | 11065/701/891/983/991           | 5     |
| BP                          | GO:1903046 | 'Meiotic cell cycle process'                                                          | 5/15       | 183/17381 | $3.38 \times 10^{-7}$ | $2.54 \times 10^{-6}$ | $8.99 \times 10^{-7}$ | 6790/701/7153/9232/991          | 5     |
| BP                          | GO:0010389 | 'Regulation of G2/M transition of mitotic cell cycle'                                 | 5/15       | 194/17381 | $4.51 \times 10^{-7}$ | $3.34 \times 10^{-6}$ | $1.18 \times 10^{-6}$ | 1063/22974/6790/891/983         | 5     |
| BP                          | GO:1903322 | 'Positive regulation of protein modification by small protein conjugation or removal' | 5/15       | 200/17381 | $5.25 \times 10^{-7}$ | $3.83 \times 10^{-6}$ | $1.36 \times 10^{-6}$ | 11065/701/891/983/991           | 5     |
| BP                          | GO:0045862 | 'Positive regulation of proteolysis'                                                  | 6/15       | 393/17381 | $5.42 \times 10^{-7}$ | $3.90 \times 10^{-6}$ | $1.38 \times 10^{-6}$ | 11065/6790/701/891/983/991      | 6     |
| BP                          | GO:0031331 | 'Positive regulation of cellular catabolic process'                                   | 6/15       | 396/17381 | $5.66 \times 10^{-7}$ | $4.02 \times 10^{-6}$ | $1.42 \times 10^{-6}$ | 11065/6790/701/891/983/991      | 6     |

Table SIII. Continued.

| A, GO functional enrichment |            |                                                                                                 |            |           |                       |                       |                       |                            |       |
|-----------------------------|------------|-------------------------------------------------------------------------------------------------|------------|-----------|-----------------------|-----------------------|-----------------------|----------------------------|-------|
| Ontology                    | ID         | Description                                                                                     | Gene ratio | BgRatio   | P-value               | P.adjust              | q-value               | Gene ID                    | Count |
| BP                          | GO:1902749 | 'Regulation of cell cycle G2/M phase transition'                                                | 5/15       | 204/17381 | 5.79x10 <sup>-7</sup> | 4.05x10 <sup>-6</sup> | 1.44x10 <sup>-6</sup> | 1063/22974/6790/891/983    | 5     |
| BP                          | GO:0042176 | 'Regulation of protein catabolic process'                                                       | 6/15       | 399/17381 | 5.92x10 <sup>-7</sup> | 4.09x10 <sup>-6</sup> | 1.45x10 <sup>-6</sup> | 11065/6790/701/891/983/991 | 6     |
| BP                          | GO:1901991 | 'Negative regulation of mitotic cell cycle phase transition'                                    | 5/15       | 224/17381 | 9.19x10 <sup>-7</sup> | 6.26x10 <sup>-6</sup> | 2.22x10 <sup>-6</sup> | 1063/6790/701/891/983      | 5     |
| BP                          | GO:0051225 | 'Spindle assembly'                                                                              | 4/15       | 96/17381  | 1.14x10 <sup>-6</sup> | 7.63x10 <sup>-6</sup> | 2.70x10 <sup>-6</sup> | 22974/332/6790/991         | 4     |
| BP                          | GO:0009896 | 'Positive regulation of catabolic process'                                                      | 6/15       | 447/17381 | 1.15x10 <sup>-6</sup> | 7.63x10 <sup>-6</sup> | 2.70x10 <sup>-6</sup> | 11065/6790/701/891/983/991 | 6     |
| BP                          | GO:1901988 | 'Negative regulation of cell cycle phase transition'                                            | 5/15       | 235/17381 | 1.16x10 <sup>-6</sup> | 7.63x10 <sup>-6</sup> | 2.70x10 <sup>-6</sup> | 1063/6790/701/891/983      | 5     |
| BP                          | GO:0044774 | 'Mitotic DNA integrity checkpoint'                                                              | 4/15       | 109/17381 | 1.89x10 <sup>-6</sup> | 1.23x10 <sup>-5</sup> | 4.34x10 <sup>-6</sup> | 6790/7153/891/983          | 4     |
| BP                          | GO:0007094 | 'Mitotic spindle assembly checkpoint'                                                           | 3/15       | 30/17381  | 2.08x10 <sup>-6</sup> | 1.29x10 <sup>-5</sup> | 4.59x10 <sup>-6</sup> | 1063/701/891               | 3     |
| BP                          | GO:0071173 | 'Spindle assembly checkpoint'                                                                   | 3/15       | 30/17381  | 2.08x10 <sup>-6</sup> | 1.29x10 <sup>-5</sup> | 4.59x10 <sup>-6</sup> | 1063/701/891               | 3     |
| BP                          | GO:0071174 | 'Mitotic spindle checkpoint'                                                                    | 3/15       | 30/17381  | 2.08x10 <sup>-6</sup> | 1.29x10 <sup>-5</sup> | 4.59x10 <sup>-6</sup> | 1063/701/891               | 3     |
| BP                          | GO:0031396 | 'Regulation of protein ubiquitination'                                                          | 5/15       | 265/17381 | 2.10x10 <sup>-6</sup> | 1.29x10 <sup>-5</sup> | 4.59x10 <sup>-6</sup> | 11065/701/891/983/991      | 5     |
| BP                          | GO:0045841 | 'Negative regulation of mitotic metaphase/anaphase transition'                                  | 3/15       | 31/17381  | 2.30x10 <sup>-6</sup> | 1.40x10 <sup>-5</sup> | 4.97x10 <sup>-6</sup> | 1063/701/891               | 3     |
| BP                          | GO:1902100 | 'Negative regulation of metaphase/anaphase transition of cell cycle'                            | 3/15       | 32/17381  | 2.54x10 <sup>-6</sup> | 1.53x10 <sup>-5</sup> | 5.41x10 <sup>-6</sup> | 1063/701/891               | 3     |
| BP                          | GO:0031577 | 'Spindle checkpoint'                                                                            | 3/15       | 34/17381  | 3.06x10 <sup>-6</sup> | 1.82x10 <sup>-5</sup> | 6.45x10 <sup>-6</sup> | 1063/701/891               | 3     |
| BP                          | GO:1903320 | 'Regulation of protein modification by small protein conjugation or removal'                    | 5/15       | 291/17381 | 3.33x10 <sup>-6</sup> | 1.94x10 <sup>-5</sup> | 6.89x10 <sup>-6</sup> | 11065/701/891/983/991      | 5     |
| BP                          | GO:0030261 | 'Chromosome condensation'                                                                       | 3/15       | 35/17381  | 3.35x10 <sup>-6</sup> | 1.94x10 <sup>-5</sup> | 6.89x10 <sup>-6</sup> | 7153/891/983               | 3     |
| BP                          | GO:0016572 | 'Histone phosphorylation'                                                                       | 3/15       | 37/17381  | 3.97x10 <sup>-6</sup> | 2.28x10 <sup>-5</sup> | 8.08x10 <sup>-6</sup> | 6790/891/983               | 3     |
| BP                          | GO:0045931 | 'Positive regulation of mitotic cell cycle'                                                     | 4/15       | 145/17381 | 5.91x10 <sup>-6</sup> | 3.35x10 <sup>-5</sup> | 1.19x10 <sup>-5</sup> | 11065/6790/891/983         | 4     |
| BP                          | GO:0007077 | 'Mitotic nuclear envelope disassembly'                                                          | 3/15       | 44/17381  | 6.74x10 <sup>-6</sup> | 3.79x10 <sup>-5</sup> | 1.34x10 <sup>-5</sup> | 891/9133/983               | 3     |
| BP                          | GO:0010639 | 'Negative regulation of organelle organization'                                                 | 5/15       | 340/17381 | 7.11x10 <sup>-6</sup> | 3.95x10 <sup>-5</sup> | 1.40x10 <sup>-5</sup> | 1063/701/7153/891/9232     | 5     |
| BP                          | GO:0030397 | 'Membrane disassembly'                                                                          | 3/15       | 48/17381  | 8.79x10 <sup>-6</sup> | 4.78x10 <sup>-5</sup> | 1.69x10 <sup>-5</sup> | 891/9133/983               | 3     |
| BP                          | GO:0051081 | 'Nuclear envelope disassembly'                                                                  | 3/15       | 48/17381  | 8.79x10 <sup>-6</sup> | 4.78x10 <sup>-5</sup> | 1.69x10 <sup>-5</sup> | 891/9133/983               | 3     |
| BP                          | GO:0031570 | 'DNA integrity checkpoint'                                                                      | 4/15       | 164/17381 | 9.62x10 <sup>-6</sup> | 5.17x10 <sup>-5</sup> | 1.83x10 <sup>-5</sup> | 6790/7153/891/983          | 4     |
| BP                          | GO:0051348 | 'Negative regulation of transferase activity'                                                   | 5/15       | 369/17381 | 1.06x10 <sup>-5</sup> | 5.63x10 <sup>-5</sup> | 2.00x10 <sup>-5</sup> | 11065/701/891/983/991      | 5     |
| BP                          | GO:0090307 | 'Mitotic spindle assembly'                                                                      | 3/15       | 59/17381  | 1.64x10 <sup>-5</sup> | 8.65x10 <sup>-5</sup> | 3.07x10 <sup>-5</sup> | 22974/332/991              | 3     |
| BP                          | GO:0006977 | 'DNA damage response, signal transduction by p53 class mediator resulting in cell cycle arrest' | 3/15       | 62/17381  | 1.91x10 <sup>-5</sup> | 9.95x10 <sup>-5</sup> | 3.52x10 <sup>-5</sup> | 6790/891/983               | 3     |

Table SIII. Continued.

| Ontology | ID         | Description                                                              | Gene ratio | BgRatio   | P-value               | P.adjust    | q-value               | Gene ID            | Count |
|----------|------------|--------------------------------------------------------------------------|------------|-----------|-----------------------|-------------|-----------------------|--------------------|-------|
| BP       | GO:0072431 | 'Signal transduction involved in mitotic G1 DNA damage checkpoint'       | 3/15       | 63/17381  | 2.00x10 <sup>-5</sup> | 0.000102292 | 3.62x10 <sup>-5</sup> | 6790/891/983       | 3     |
| BP       | GO:1902400 | 'Intracellular signal transduction involved in G1 DNA damage checkpoint' | 3/15       | 63/17381  | 2.00x10 <sup>-5</sup> | 0.000102292 | 3.62x10 <sup>-5</sup> | 6790/891/983       | 3     |
| BP       | GO:0072413 | 'Signal transduction involved in mitotic cell cycle checkpoint'          | 3/15       | 65/17381  | 2.20x10 <sup>-5</sup> | 0.000109125 | 3.87x10 <sup>-5</sup> | 6790/891/983       | 3     |
| BP       | GO:1902402 | 'Signal transduction involved in mitotic DNA damage checkpoint'          | 3/15       | 65/17381  | 2.20x10 <sup>-5</sup> | 0.000109125 | 3.87x10 <sup>-5</sup> | 6790/891/983       | 3     |
| BP       | GO:1902403 | 'Signal transduction involved in mitotic DNA integrity checkpoint'       | 3/15       | 65/17381  | 2.20x10 <sup>-5</sup> | 0.000109125 | 3.87x10 <sup>-5</sup> | 6790/891/983       | 3     |
| BP       | GO:0072401 | 'Signal transduction involved in DNA integrity checkpoint'               | 3/15       | 67/17381  | 2.41x10 <sup>-5</sup> | 0.000117279 | 4.16x10 <sup>-5</sup> | 6790/891/983       | 3     |
| BP       | GO:0072422 | 'Signal transduction involved in DNA damage checkpoint'                  | 3/15       | 67/17381  | 2.41x10 <sup>-5</sup> | 0.000117279 | 4.16x10 <sup>-5</sup> | 6790/891/983       | 3     |
| BP       | GO:0072395 | 'Signal transduction involved in cell cycle checkpoint'                  | 3/15       | 68/17381  | 2.52x10 <sup>-5</sup> | 0.000121472 | 4.30x10 <sup>-5</sup> | 6790/891/983       | 3     |
| BP       | GO:0031571 | 'Mitotic G1 DNA damage checkpoint'                                       | 3/15       | 71/17381  | 2.87x10 <sup>-5</sup> | 0.000135756 | 4.81x10 <sup>-5</sup> | 6790/891/983       | 3     |
| BP       | GO:0044819 | 'Mitotic G1/S transition checkpoint'                                     | 3/15       | 71/17381  | 2.87x10 <sup>-5</sup> | 0.000135756 | 4.81x10 <sup>-5</sup> | 6790/891/983       | 3     |
| BP       | GO:0044783 | 'G1 DNA damage checkpoint'                                               | 3/15       | 72/17381  | 2.99x10 <sup>-5</sup> | 0.000140287 | 4.97x10 <sup>-5</sup> | 6790/891/983       | 3     |
| BP       | GO:0035404 | 'Histone-serine phosphorylation'                                         | 2/15       | 12/17381  | 4.57x10 <sup>-5</sup> | 0.00021017  | 7.45x10 <sup>-5</sup> | 6790/891           | 2     |
| BP       | GO:0055015 | 'Ventricular cardiac muscle cell development'                            | 2/15       | 12/17381  | 4.57x10 <sup>-5</sup> | 0.00021017  | 7.45x10 <sup>-5</sup> | 891/983            | 2     |
| BP       | GO:0006998 | 'Nuclear envelope organization'                                          | 3/15       | 86/17381  | 5.10x10 <sup>-5</sup> | 0.000231247 | 8.19x10 <sup>-5</sup> | 891/9133/983       | 3     |
| BP       | GO:0007050 | 'Cell cycle arrest'                                                      | 4/15       | 251/17381 | 5.11x10 <sup>-5</sup> | 0.000231247 | 8.19x10 <sup>-5</sup> | 1033/6790/891/983  | 4     |
| BP       | GO:0045132 | 'Meiotic chromosome segregation'                                         | 3/15       | 88/17381  | 5.46x10 <sup>-5</sup> | 0.000242635 | 8.60x10 <sup>-5</sup> | 701/7153/9232      | 3     |
| BP       | GO:0071158 | 'Positive regulation of cell cycle arrest'                               | 3/15       | 88/17381  | 5.46x10 <sup>-5</sup> | 0.000242635 | 8.60x10 <sup>-5</sup> | 6790/891/983       | 3     |
| BP       | GO:0000082 | 'G1/S transition of mitotic cell cycle'                                  | 4/15       | 265/17381 | 6.32x10 <sup>-5</sup> | 0.000278251 | 9.86x10 <sup>-5</sup> | 1033/6790/891/983  | 4     |
| BP       | GO:0072331 | 'Signal transduction by p53 class mediator'                              | 4/15       | 270/17381 | 6.79x10 <sup>-5</sup> | 0.000296659 | 0.000105109           | 22974/6790/891/983 | 4     |
| BP       | GO:0090068 | 'Positive regulation of cell cycle process'                              | 4/15       | 274/17381 | 7.19x10 <sup>-5</sup> | 0.000311433 | 0.000110344           | 11065/6790/891/983 | 4     |
| BP       | GO:0044843 | 'Cell cycle G1/S phase transition'                                       | 4/15       | 284/17381 | 8.26x10 <sup>-5</sup> | 0.000354889 | 0.000125741           | 1033/6790/891/983  | 4     |
| BP       | GO:0044773 | 'Mitotic DNA damage checkpoint'                                          | 3/15       | 102/17381 | 8.48x10 <sup>-5</sup> | 0.000361192 | 0.000127974           | 6790/891/983       | 3     |
| BP       | GO:0055012 | 'Ventricular cardiac muscle cell differentiation'                        | 2/15       | 17/17381  | 9.38x10 <sup>-5</sup> | 0.000396296 | 0.000140412           | 891/983            | 2     |
| BP       | GO:0030330 | 'DNA damage response, signal transduction by p53 class mediator'         | 3/15       | 109/17381 | 0.000103332           | 0.000432808 | 0.000153348           | 6790/891/983       | 3     |
| BP       | GO:0002082 | 'Regulation of oxidative phosphorylation'                                | 2/15       | 18/17381  | 0.000105517           | 0.000434039 | 0.000153785           | 891/983            | 2     |

Table SIII. Continued.

| A, GO functional enrichment |            |                                                                |            |           |             |             |             |                    |       |
|-----------------------------|------------|----------------------------------------------------------------|------------|-----------|-------------|-------------|-------------|--------------------|-------|
| Ontology                    | ID         | Description                                                    | Gene ratio | BgRatio   | P-value     | P.adjust    | q-value     | Gene ID            | Count |
| BP                          | GO:0034501 | 'Protein localization to kinetochore'                          | 2/15       | 18/17381  | 0.000105517 | 0.000434039 | 0.000153785 | 701/983            | 2     |
| BP                          | GO:2000134 | 'Negative regulation of G1/S transition of mitotic cell cycle' | 3/15       | 110/17381 | 0.000106174 | 0.000434039 | 0.000153785 | 6790/891/983       | 3     |
| BP                          | GO:0007127 | 'Meiosis I'                                                    | 3/15       | 113/17381 | 0.000115006 | 0.000462739 | 0.000163953 | 6790/7153/9232     | 3     |
| BP                          | GO:0071156 | 'Regulation of cell cycle arrest'                              | 3/15       | 113/17381 | 0.000115006 | 0.000462739 | 0.000163953 | 6790/891/983       | 3     |
| BP                          | GO:1902807 | 'Negative regulation of cell cycle G1/S phase transition'      | 3/15       | 117/17381 | 0.000127509 | 0.000509039 | 0.000180358 | 6790/891/983       | 3     |
| BP                          | GO:0071459 | 'Protein localization to chromosome, centromeric region'       | 2/15       | 21/17381  | 0.00014461  | 0.000572836 | 0.000202962 | 701/983            | 2     |
| BP                          | GO:0042770 | 'Signal transduction in response to DNA damage'                | 3/15       | 123/17381 | 0.000147876 | 0.000581266 | 0.000205948 | 6790/891/983       | 3     |
| BP                          | GO:0043457 | 'Regulation of cellular respiration'                           | 2/15       | 24/17381  | 0.000189775 | 0.000740267 | 0.000262284 | 891/983            | 2     |
| BP                          | GO:2000241 | 'Regulation of reproductive process'                           | 3/15       | 138/17381 | 0.000207781 | 0.000804365 | 0.000284995 | 6790/983/991       | 3     |
| BP                          | GO:0001556 | 'Oocyte maturation'                                            | 2/15       | 26/17381  | 0.000223244 | 0.000857728 | 0.000303902 | 6790/891           | 2     |
| BP                          | GO:0016202 | 'Regulation of striated muscle tissue development'             | 3/15       | 142/17381 | 0.000226049 | 0.000862021 | 0.000305423 | 1063/891/983       | 3     |
| BP                          | GO:1901861 | 'Regulation of muscle tissue development'                      | 3/15       | 144/17381 | 0.00023556  | 0.00089164  | 0.000315917 | 1063/891/983       | 3     |
| BP                          | GO:0045787 | 'Positive regulation of cell cycle'                            | 4/15       | 374/17381 | 0.000238609 | 0.000896538 | 0.000317653 | 11065/6790/891/983 | 4     |
| BP                          | GO:0006997 | 'Nucleus organization'                                         | 3/15       | 145/17381 | 0.000240412 | 0.00089672  | 0.000317717 | 891/9133/983       | 3     |
| BP                          | GO:0048634 | 'Regulation of muscle organ development'                       | 3/15       | 147/17381 | 0.00025031  | 0.000926871 | 0.0003284   | 1063/891/983       | 3     |
| BP                          | GO:0000077 | 'DNA damage checkpoint'                                        | 3/15       | 155/17381 | 0.000292537 | 0.001075441 | 0.00038104  | 6790/891/983       | 3     |
| BP                          | GO:2000045 | 'Regulation of G1/S transition of mitotic cell cycle'          | 3/15       | 162/17381 | 0.000333058 | 0.001215663 | 0.000430722 | 6790/891/983       | 3     |
| BP                          | GO:1903580 | 'Positive regulation of ATP metabolic process'                 | 2/15       | 33/17381  | 0.000361422 | 0.001309836 | 0.000464089 | 891/983            | 2     |
| BP                          | GO:0060045 | 'Positive regulation of cardiac muscle cell proliferation'     | 2/15       | 35/17381  | 0.000406879 | 0.001464191 | 0.000518778 | 891/983            | 2     |
| BP                          | GO:1902806 | 'Regulation of cell cycle G1/S phase transition'               | 3/15       | 181/17381 | 0.000460873 | 0.001646895 | 0.000583512 | 6790/891/983       | 3     |
| BP                          | GO:0031099 | 'Regeneration'                                                 | 3/15       | 186/17381 | 0.00049906  | 0.001770968 | 0.000627472 | 6790/891/983       | 3     |
| BP                          | GO:0051445 | 'Regulation of meiotic cell cycle'                             | 2/15       | 44/17381  | 0.000644008 | 0.002254027 | 0.000798625 | 983/991            | 2     |
| BP                          | GO:0055023 | 'Positive regulation of cardiac muscle tissue growth'          | 2/15       | 44/17381  | 0.000644008 | 0.002254027 | 0.000798625 | 891/983            | 2     |
| BP                          | GO:0048599 | 'Oocyte development'                                           | 2/15       | 45/17381  | 0.000673626 | 0.002341651 | 0.000829671 | 6790/891           | 2     |
| BP                          | GO:0006323 | 'DNA packaging'                                                | 3/15       | 208/17381 | 0.00069118  | 0.002386438 | 0.00084554  | 7153/891/983       | 3     |

Table SIII. Continued.

| Ontology | ID         | Description                                                  | Gene ratio | BgRatio   | P-value     | Padjust     | q-value     | Gene ID      | Count |
|----------|------------|--------------------------------------------------------------|------------|-----------|-------------|-------------|-------------|--------------|-------|
| BP       | GO:0009994 | 'Oocyte differentiation'                                     | 2/15       | 48/17381  | 0.000766378 | 0.002610795 | 0.000925032 | 6790/891     | 2     |
| BP       | GO:0060421 | 'Positive regulation of heart growth'                        | 2/15       | 48/17381  | 0.000766378 | 0.002610795 | 0.000925032 | 891/983      | 2     |
| BP       | GO:0045840 | 'Positive regulation of mitotic nuclear division'            | 2/15       | 50/17381  | 0.000831452 | 0.002813723 | 0.000996931 | 11065/6790   | 2     |
| BP       | GO:0060043 | 'Regulation of cardiac muscle cell proliferation'            | 2/15       | 53/17381  | 0.000933902 | 0.00313963  | 0.001112404 | 891/983      | 2     |
| BP       | GO:0051310 | 'Metaphase plate congression'                                | 2/15       | 55/17381  | 0.001005416 | 0.003357957 | 0.001189759 | 1063/891     | 2     |
| BP       | GO:0055025 | 'Positive regulation of cardiac muscle tissue development'   | 2/15       | 57/17381  | 0.001079492 | 0.003581949 | 0.001269122 | 891/983      | 2     |
| BP       | GO:0046622 | 'Positive regulation of organ growth'                        | 2/15       | 59/17381  | 0.001156122 | 0.003811472 | 0.001350444 | 891/983      | 2     |
| BP       | GO:0051785 | 'Positive regulation of nuclear division'                    | 2/15       | 61/17381  | 0.001235298 | 0.004046394 | 0.00143368  | 11065/6790   | 2     |
| BP       | GO:0021700 | 'Developmental maturation'                                   | 3/15       | 256/17381 | 0.001260314 | 0.004102042 | 0.001453396 | 6790/891/991 | 3     |
| BP       | GO:0060038 | 'Cardiac muscle cell proliferation'                          | 2/15       | 63/17381  | 0.001317014 | 0.004259456 | 0.00150917  | 891/983      | 2     |
| BP       | GO:0055021 | 'Regulation of cardiac muscle tissue growth'                 | 2/15       | 68/17381  | 0.001532357 | 0.004924745 | 0.001744888 | 891/983      | 2     |
| BP       | GO:1901992 | 'Positive regulation of mitotic cell cycle phase transition' | 2/15       | 70/17381  | 0.001622896 | 0.005183124 | 0.001836435 | 11065/983    | 2     |
| BP       | GO:0055013 | 'Cardiac muscle cell development'                            | 2/15       | 71/17381  | 0.001669105 | 0.005297593 | 0.001876993 | 891/983      | 2     |
| BP       | GO:0060420 | 'Regulation of heart growth'                                 | 2/15       | 73/17381  | 0.001763396 | 0.005562317 | 0.001970787 | 891/983      | 2     |
| BP       | GO:0018105 | 'Peptidyl-serine phosphorylation'                            | 3/15       | 289/17381 | 0.00178481  | 0.005595325 | 0.001982482 | 6790/891/983 | 3     |
| BP       | GO:0071103 | 'DNA conformation change'                                    | 3/15       | 290/17381 | 0.00180253  | 0.005610089 | 0.001987713 | 7153/891/983 | 3     |
| BP       | GO:0014855 | 'Striated muscle cell proliferation'                         | 2/15       | 74/17381  | 0.001811477 | 0.005610089 | 0.001987713 | 891/983      | 2     |
| BP       | GO:0034502 | 'Protein localization to chromosome'                         | 2/15       | 75/17381  | 0.00186018  | 0.005691927 | 0.002016709 | 701/983      | 2     |
| BP       | GO:0051303 | 'Establishment of chromosome localization'                   | 2/15       | 75/17381  | 0.00186018  | 0.005691927 | 0.002016709 | 1063/891     | 2     |
| BP       | GO:0050000 | 'Chromosome localization'                                    | 2/15       | 76/17381  | 0.001909503 | 0.005808073 | 0.002057861 | 1063/891     | 2     |
| BP       | GO:0055006 | 'Cardiac cell development'                                   | 2/15       | 77/17381  | 0.001959447 | 0.005924719 | 0.00209919  | 891/983      | 2     |
| BP       | GO:0031100 | 'Animal organ regeneration'                                  | 2/15       | 80/17381  | 0.00211299  | 0.006351399 | 0.002250367 | 6790/983     | 2     |
| BP       | GO:0018209 | 'Peptidyl-serine modification'                               | 3/15       | 308/17381 | 0.002140635 | 0.006396079 | 0.002266198 | 6790/891/983 | 3     |
| BP       | GO:0045844 | 'Positive regulation of striated muscle tissue development'  | 2/15       | 81/17381  | 0.002165405 | 0.006396079 | 0.002266198 | 891/983      | 2     |
| BP       | GO:0048636 | 'Positive regulation of muscle organ development'            | 2/15       | 81/17381  | 0.002165405 | 0.006396079 | 0.002266198 | 891/983      | 2     |
| BP       | GO:1901863 | 'Positive regulation of muscle tissue development'           | 2/15       | 82/17381  | 0.002218435 | 0.006515058 | 0.002308353 | 891/983      | 2     |
| BP       | GO:0048477 | 'Oogenesis'                                                  | 2/15       | 83/17381  | 0.002272079 | 0.00663447  | 0.002350662 | 6790/891     | 2     |

Table SIII. Continued.

| Ontology | ID         | Description                                                               | Gene ratio | BgRatio   | P-value     | P.adjust    | q-value     | Gene ID      | Count |
|----------|------------|---------------------------------------------------------------------------|------------|-----------|-------------|-------------|-------------|--------------|-------|
| BP       | GO:0000079 | 'Regulation of cyclin-dependent protein serine/threonine kinase activity' | 2/15       | 84/17381  | 0.002326337 | 0.006678416 | 0.002366232 | 1033/891     | 2     |
| BP       | GO:0042775 | 'Mitochondrial ATP synthesis coupled electron transport'                  | 2/15       | 84/17381  | 0.002326337 | 0.006678416 | 0.002366232 | 891/983      | 2     |
| BP       | GO:1901989 | 'Positive regulation of cell cycle phase transition'                      | 2/15       | 84/17381  | 0.002326337 | 0.006678416 | 0.002366232 | 11065/983    | 2     |
| BP       | GO:0042773 | 'ATP synthesis coupled electron transport'                                | 2/15       | 85/17381  | 0.002381207 | 0.006797747 | 0.002408513 | 891/983      | 2     |
| BP       | GO:1904029 | 'Regulation of cyclin-dependent protein kinase activity'                  | 2/15       | 88/17381  | 0.002549482 | 0.007237697 | 0.002564392 | 1033/891     | 2     |
| BP       | GO:0055024 | 'Regulation of cardiac muscle tissue development'                         | 2/15       | 90/17381  | 0.002664711 | 0.007523023 | 0.002665486 | 891/983      | 2     |
| BP       | GO:1903578 | 'Regulation of ATP metabolic process'                                     | 2/15       | 91/17381  | 0.002723236 | 0.007646008 | 0.00270906  | 891/983      | 2     |
| BP       | GO:0010972 | 'Negative regulation of G2/M transition of mitotic cell cycle'            | 2/15       | 92/17381  | 0.002782366 | 0.00776934  | 0.002752758 | 6790/983     | 2     |
| BP       | GO:0016925 | 'Protein sumoylation'                                                     | 2/15       | 94/17381  | 0.002902441 | 0.00797391  | 0.00282524  | 332/7153     | 2     |
| BP       | GO:0055017 | 'Cardiac muscle tissue growth'                                            | 2/15       | 94/17381  | 0.002902441 | 0.00797391  | 0.00282524  | 891/983      | 2     |
| BP       | GO:1902750 | 'Negative regulation of cell cycle G2/M phase transition'                 | 2/15       | 94/17381  | 0.002902441 | 0.00797391  | 0.00282524  | 6790/983     | 2     |
| BP       | GO:0060419 | 'Heart growth'                                                            | 2/15       | 100/17381 | 0.003277106 | 0.008955086 | 0.00317288  | 891/983      | 2     |
| BP       | GO:0022904 | 'Respiratory electron transport chain'                                    | 2/15       | 102/17381 | 0.003406782 | 0.00921093  | 0.003263529 | 891/983      | 2     |
| BP       | GO:0046620 | 'Regulation of organ growth'                                              | 2/15       | 102/17381 | 0.003406782 | 0.00921093  | 0.003263529 | 891/983      | 2     |
| BP       | GO:0014706 | 'Striated muscle tissue development'                                      | 3/15       | 369/17381 | 0.003571922 | 0.009606591 | 0.003403716 | 1063/891/983 | 3     |
| BP       | GO:0006119 | 'Oxidative phosphorylation'                                               | 2/15       | 105/17381 | 0.003605761 | 0.009646826 | 0.003417971 | 891/983      | 2     |
| BP       | GO:0060537 | 'Muscle tissue development'                                               | 3/15       | 387/17381 | 0.00408372  | 0.010868651 | 0.003850876 | 1063/891/983 | 3     |
| BP       | GO:0007517 | 'Muscle organ development'                                                | 3/15       | 389/17381 | 0.004143216 | 0.010969862 | 0.003886737 | 1063/891/983 | 3     |
| BP       | GO:0010256 | 'Endomembrane system organization'                                        | 3/15       | 396/17381 | 0.004355649 | 0.011472868 | 0.004064957 | 891/9133/983 | 3     |
| BP       | GO:0055007 | 'Cardiac muscle cell differentiation'                                     | 2/15       | 116/17381 | 0.004380789 | 0.011479913 | 0.004067453 | 891/983      | 2     |
| BP       | GO:0007098 | 'Centrosome cycle'                                                        | 2/15       | 118/17381 | 0.004529311 | 0.01180856  | 0.004183896 | 6790/983     | 2     |
| BP       | GO:0042493 | 'Response to drug'                                                        | 3/15       | 411/17381 | 0.004833094 | 0.012536605 | 0.00444185  | 1063/891/983 | 3     |
| BP       | GO:0043467 | 'Regulation of generation of precursor metabolites and energy'            | 2/15       | 124/17381 | 0.00498878  | 0.012875083 | 0.004561776 | 891/983      | 2     |
| BP       | GO:0031023 | 'Microtubule organizing center organization'                              | 2/15       | 127/17381 | 0.00522629  | 0.013420273 | 0.004754943 | 6790/983     | 2     |
| BP       | GO:0007292 | 'Female gamete generation'                                                | 2/15       | 129/17381 | 0.005387494 | 0.013765046 | 0.0048771   | 6790/891     | 2     |
| BP       | GO:0016570 | 'Histone modification'                                                    | 3/15       | 444/17381 | 0.005992804 | 0.015235438 | 0.005398075 | 6790/891/983 | 3     |
| BP       | GO:0000910 | 'Cytokinesis'                                                             | 2/15       | 137/17381 | 0.006055055 | 0.015317491 | 0.005427147 | 6790/9055    | 2     |

Table SIII. Continued.

| Ontology | ID         | Description                                                                        | Gene ratio | BgRatio   | P-value     | Padjust     | q-value     | Gene ID      | Count |
|----------|------------|------------------------------------------------------------------------------------|------------|-----------|-------------|-------------|-------------|--------------|-------|
| BP       | GO:0045981 | 'Positive regulation of nucleotide metabolic process'                              | 2/15       | 145/17381 | 0.006758665 | 0.016929794 | 0.005998403 | 891/983      | 2     |
| BP       | GO:1900544 | 'Positive regulation of purine nucleotide metabolic process'                       | 2/15       | 145/17381 | 0.006758665 | 0.016929794 | 0.005998403 | 891/983      | 2     |
| BP       | GO:0035051 | 'Cardiocyte differentiation'                                                       | 2/15       | 146/17381 | 0.006849128 | 0.017072705 | 0.006049038 | 891/983      | 2     |
| BP       | GO:0071695 | 'Anatomical structure maturation'                                                  | 2/15       | 150/17381 | 0.007216523 | 0.017901181 | 0.006342575 | 6790/891     | 2     |
| BP       | GO:0055002 | 'Striated muscle cell development'                                                 | 2/15       | 154/17381 | 0.007592744 | 0.018653327 | 0.006609069 | 891/983      | 2     |
| BP       | GO:0070507 | 'Regulation of microtubule cytoskeleton organization'                              | 2/15       | 154/17381 | 0.007592744 | 0.018653327 | 0.006609069 | 22974/6790   | 2     |
| BP       | GO:0071900 | 'Regulation of protein serine/threonine kinase activity'                           | 3/15       | 495/17381 | 0.008092353 | 0.019785609 | 0.007010248 | 1033/891/983 | 3     |
| BP       | GO:0071281 | 'Cellular response to iron ion'                                                    | 1/15       | 10/17381  | 0.008598893 | 0.020824807 | 0.007378446 | 891          | 1     |
| BP       | GO:1990001 | 'Inhibition of cysteine-type endopeptidase activity involved in apoptotic process' | 1/15       | 10/17381  | 0.008598893 | 0.020824807 | 0.007378446 | 332          | 1     |
| BP       | GO:0048469 | 'Cell maturation'                                                                  | 2/15       | 166/17381 | 0.008773794 | 0.021148154 | 0.007493012 | 6790/891     | 2     |
| BP       | GO:0035265 | 'Organ growth'                                                                     | 2/15       | 168/17381 | 0.008978201 | 0.021539253 | 0.007631582 | 891/983      | 2     |
| BP       | GO:0055001 | 'Muscle cell development'                                                          | 2/15       | 169/17381 | 0.009081209 | 0.02168457  | 0.007683069 | 891/983      | 2     |
| BP       | GO:0022900 | 'Electron transport chain'                                                         | 2/15       | 170/17381 | 0.009184752 | 0.021829806 | 0.007734528 | 891/983      | 2     |
| BP       | GO:0045333 | 'Cellular respiration'                                                             | 2/15       | 172/17381 | 0.009393439 | 0.021861957 | 0.00774592  | 891/983      | 2     |
| BP       | GO:0007135 | 'Meiosis II'                                                                       | 1/15       | 11/17381  | 0.009454976 | 0.021861957 | 0.00774592  | 701          | 1     |
| BP       | GO:0039692 | 'Single stranded viral RNA replication, via double stranded DNA intermediate'      | 1/15       | 11/17381  | 0.009454976 | 0.021861957 | 0.00774592  | 7153         | 1     |
| BP       | GO:0060281 | 'Regulation of oocyte development'                                                 | 1/15       | 11/17381  | 0.009454976 | 0.021861957 | 0.00774592  | 6790         | 1     |
| BP       | GO:0070601 | 'Centromeric sister chromatid cohesion'                                            | 1/15       | 11/17381  | 0.009454976 | 0.021861957 | 0.00774592  | 701          | 1     |
| BP       | GO:1905879 | 'Regulation of oogenesis'                                                          | 1/15       | 11/17381  | 0.009454976 | 0.021861957 | 0.00774592  | 6790         | 1     |
| BP       | GO:0043902 | 'Positive regulation of multi-organism process'                                    | 2/15       | 174/17381 | 0.009604254 | 0.022007955 | 0.007797648 | 6790/7153    | 2     |
| BP       | GO:0048639 | 'Positive regulation of developmental growth'                                      | 2/15       | 174/17381 | 0.009604254 | 0.022007955 | 0.007797648 | 891/983      | 2     |
| BP       | GO:1901796 | 'Regulation of signal transduction by p53 class mediator'                          | 2/15       | 176/17381 | 0.009817192 | 0.022395469 | 0.007934948 | 22974/6790   | 2     |
| BP       | GO:0000022 | 'Mitotic spindle elongation'                                                       | 1/15       | 12/17381  | 0.010310369 | 0.023209684 | 0.008223433 | 9055         | 1     |
| BP       | GO:0051988 | 'Regulation of attachment of spindle microtubules to kinetochore'                  | 1/15       | 12/17381  | 0.010310369 | 0.023209684 | 0.008223433 | 891          | 1     |
| BP       | GO:0090128 | 'Regulation of synapse maturation'                                                 | 1/15       | 12/17381  | 0.010310369 | 0.023209684 | 0.008223433 | 991          | 1     |
| BP       | GO:0032886 | 'Regulation of microtubule-based process'                                          | 2/15       | 182/17381 | 0.010468669 | 0.023462675 | 0.008313071 | 22974/6790   | 2     |

Table SIII. Continued.

| A, GO functional enrichment |            |                                                                     |            |           |             |             |             |          |       |
|-----------------------------|------------|---------------------------------------------------------------------|------------|-----------|-------------|-------------|-------------|----------|-------|
| Ontology                    | ID         | Description                                                         | Gene ratio | BgRatio   | P-value     | Padjust     | q-value     | Gene ID  | Count |
| BP                          | GO:0006367 | 'Transcription initiation from RNA polymerase II promoter'          | 2/15       | 185/17381 | 0.010801488 | 0.024102884 | 0.008539903 | 891/983  | 2     |
| BP                          | GO:0000212 | 'Meiotic spindle organization'                                      | 1/15       | 13/17381  | 0.011165072 | 0.024278093 | 0.008601982 | 6790     | 1     |
| BP                          | GO:0033127 | 'Regulation of histone phosphorylation'                             | 1/15       | 13/17381  | 0.011165072 | 0.024278093 | 0.008601982 | 891      | 1     |
| BP                          | GO:0033160 | 'Positive regulation of protein import into nucleus, translocation' | 1/15       | 13/17381  | 0.011165072 | 0.024278093 | 0.008601982 | 983      | 1     |
| BP                          | GO:0051231 | 'Spindle elongation'                                                | 1/15       | 13/17381  | 0.011165072 | 0.024278093 | 0.008601982 | 9055     | 1     |
| BP                          | GO:0090266 | 'Regulation of mitotic cell cycle spindle assembly checkpoint'      | 1/15       | 13/17381  | 0.011165072 | 0.024278093 | 0.008601982 | 891      | 1     |
| BP                          | GO:1903504 | 'Regulation of mitotic spindle checkpoint'                          | 1/15       | 13/17381  | 0.011165072 | 0.024278093 | 0.008601982 | 891      | 1     |
| BP                          | GO:0000712 | 'Resolution of meiotic recombination intermediates'                 | 1/15       | 14/17381  | 0.012019087 | 0.025590639 | 0.00906703  | 7153     | 1     |
| BP                          | GO:0048313 | 'Golgi inheritance'                                                 | 1/15       | 14/17381  | 0.012019087 | 0.025590639 | 0.00906703  | 983      | 1     |
| BP                          | GO:0051382 | 'Kinetochore assembly'                                              | 1/15       | 14/17381  | 0.012019087 | 0.025590639 | 0.00906703  | 1063     | 1     |
| BP                          | GO:0097340 | 'Inhibition of cysteine-type endopeptidase activity'                | 1/15       | 14/17381  | 0.012019087 | 0.025590639 | 0.00906703  | 332      | 1     |
| BP                          | GO:0097341 | 'Zymogen inhibition'                                                | 1/15       | 14/17381  | 0.012019087 | 0.025590639 | 0.00906703  | 332      | 1     |
| BP                          | GO:0033002 | 'Muscle cell proliferation'                                         | 2/15       | 199/17381 | 0.012416276 | 0.026326627 | 0.009327798 | 891/983  | 2     |
| BP                          | GO:0048308 | 'Organelle inheritance'                                             | 1/15       | 15/17381  | 0.012872413 | 0.027069148 | 0.009590881 | 983      | 1     |
| BP                          | GO:0090231 | 'Regulation of spindle checkpoint'                                  | 1/15       | 15/17381  | 0.012872413 | 0.027069148 | 0.009590881 | 891      | 1     |
| BP                          | GO:0007100 | 'Mitotic centrosome separation'                                     | 1/15       | 16/17381  | 0.013725051 | 0.028743856 | 0.010184248 | 6790     | 1     |
| BP                          | GO:0048738 | 'Cardiac muscle tissue development'                                 | 2/15       | 215/17381 | 0.014383811 | 0.03000052  | 0.010629497 | 891/983  | 2     |
| BP                          | GO:0051299 | 'Centrosome separation'                                             | 1/15       | 17/17381  | 0.014577002 | 0.030279869 | 0.010728474 | 6790     | 1     |
| BP                          | GO:0009636 | 'Response to toxic substance'                                       | 2/15       | 222/17381 | 0.015284717 | 0.031621419 | 0.011203799 | 891/983  | 2     |
| BP                          | GO:0051307 | 'Meiotic chromosome separation'                                     | 1/15       | 18/17381  | 0.015428265 | 0.031662022 | 0.011218185 | 7153     | 1     |
| BP                          | GO:0051383 | 'Kinetochore organization'                                          | 1/15       | 18/17381  | 0.015428265 | 0.031662022 | 0.011218185 | 1063     | 1     |
| BP                          | GO:0007095 | 'Mitotic G2 DNA damage checkpoint'                                  | 1/15       | 19/17381  | 0.016278843 | 0.033009876 | 0.011695743 | 983      | 1     |
| BP                          | GO:0007096 | 'Regulation of exit from mitosis'                                   | 1/15       | 19/17381  | 0.016278843 | 0.033009876 | 0.011695743 | 11065    | 1     |
| BP                          | GO:0060074 | 'Synapse maturation'                                                | 1/15       | 19/17381  | 0.016278843 | 0.033009876 | 0.011695743 | 991      | 1     |
| BP                          | GO:0033158 | 'Regulation of protein import into nucleus, translocation'          | 1/15       | 20/17381  | 0.017128734 | 0.034595981 | 0.012257717 | 983      | 1     |
| BP                          | GO:0007281 | 'Germ cell development'                                             | 2/15       | 241/17381 | 0.017850247 | 0.035885655 | 0.012714662 | 6790/891 | 2     |
| BP                          | GO:0010971 | 'Positive regulation of G2/M transition of mitotic cell cycle'      | 1/15       | 21/17381  | 0.017977941 | 0.035885655 | 0.012714662 | 983      | 1     |
| BP                          | GO:0031440 | 'Regulation of mRNA 3'-end processing'                              | 1/15       | 21/17381  | 0.017977941 | 0.035885655 | 0.012714662 | 891      | 1     |
| BP                          | GO:0006352 | 'DNA-templated transcription, initiation'                           | 2/15       | 243/17381 | 0.018130364 | 0.036049089 | 0.012772568 | 891/983  | 2     |
| BP                          | GO:1903429 | 'Regulation of cell maturation'                                     | 1/15       | 22/17381  | 0.018826462 | 0.03728807  | 0.013211552 | 6790     | 1     |

Table SIII. Continued.

| Ontology | ID         | Description                                               | Gene ratio | BgRatio   | P-value     | Padjust     | q-value     | Gene ID  | Count |
|----------|------------|-----------------------------------------------------------|------------|-----------|-------------|-------------|-------------|----------|-------|
| BP       | GO:0010951 | 'Negative regulation of endopeptidase activity'           | 2/15       | 250/17381 | 0.019125624 | 0.03773434  | 0.01336967  | 332/9232 | 2     |
| BP       | GO:0007064 | 'Mitotic sister chromatid cohesion'                       | 1/15       | 23/17381  | 0.019674299 | 0.038667564 | 0.013700322 | 991      | 1     |
| BP       | GO:0045927 | 'Positive regulation of growth'                           | 2/15       | 257/17381 | 0.020143781 | 0.03943859  | 0.013973504 | 891/983  | 2     |
| BP       | GO:0006266 | 'DNA ligation'                                            | 1/15       | 24/17381  | 0.020521452 | 0.039571555 | 0.014020615 | 7153     | 1     |
| BP       | GO:0039694 | 'Viral RNA genome replication'                            | 1/15       | 24/17381  | 0.020521452 | 0.039571555 | 0.014020615 | 7153     | 1     |
| BP       | GO:0051642 | 'Centrosome localization'                                 | 1/15       | 24/17381  | 0.020521452 | 0.039571555 | 0.014020615 | 6790     | 1     |
| BP       | GO:0051984 | 'Positive regulation of chromosome segregation'           | 1/15       | 24/17381  | 0.020521452 | 0.039571555 | 0.014020615 | 891      | 1     |
| BP       | GO:1900542 | 'Regulation of purine nucleotide metabolic process'       | 2/15       | 262/17381 | 0.020884902 | 0.040120996 | 0.014215288 | 891/983  | 2     |
| BP       | GO:0010466 | 'Negative regulation of peptidase activity'               | 2/15       | 263/17381 | 0.021034503 | 0.040257045 | 0.014263491 | 332/9232 | 2     |
| BP       | GO:0021591 | 'Ventricular system development'                          | 1/15       | 25/17381  | 0.021367922 | 0.040365324 | 0.014301855 | 1063     | 1     |
| BP       | GO:0061842 | 'Microtubule organizing center localization'              | 1/15       | 25/17381  | 0.021367922 | 0.040365324 | 0.014301855 | 6790     | 1     |
| BP       | GO:1902751 | 'Positive regulation of cell cycle G2/M phase transition' | 1/15       | 25/17381  | 0.021367922 | 0.040365324 | 0.014301855 | 983      | 1     |
| BP       | GO:0015980 | 'Energy derivation by oxidation of organic compounds'     | 2/15       | 266/17381 | 0.021486043 | 0.040365324 | 0.014301855 | 891/983  | 2     |
| BP       | GO:0046034 | 'ATP metabolic process'                                   | 2/15       | 266/17381 | 0.021486043 | 0.040365324 | 0.014301855 | 891/983  | 2     |
| BP       | GO:0006140 | 'Regulation of nucleotide metabolic process'              | 2/15       | 269/17381 | 0.021941675 | 0.041070315 | 0.014551641 | 891/983  | 2     |
| BP       | GO:0051146 | 'Striated muscle cell differentiation'                    | 2/15       | 270/17381 | 0.022094458 | 0.041205357 | 0.014599488 | 891/983  | 2     |
| BP       | GO:0046688 | 'Response to copper ion'                                  | 1/15       | 26/17381  | 0.022213709 | 0.04127711  | 0.014624911 | 983      | 1     |
| BP       | GO:0050685 | 'Positive regulation of mRNA processing'                  | 1/15       | 27/17381  | 0.023058814 | 0.042538101 | 0.015071693 | 891      | 1     |
| BP       | GO:0071539 | 'Protein localization to centrosome'                      | 1/15       | 27/17381  | 0.023058814 | 0.042538101 | 0.015071693 | 6790     | 1     |
| BP       | GO:0007143 | 'Female meiotic nuclear division'                         | 1/15       | 28/17381  | 0.023903237 | 0.043468164 | 0.015401224 | 6790     | 1     |
| BP       | GO:0044818 | 'Mitotic G2/M transition checkpoint'                      | 1/15       | 28/17381  | 0.023903237 | 0.043468164 | 0.015401224 | 983      | 1     |
| BP       | GO:0070979 | 'Protein K11-linked ubiquitination'                       | 1/15       | 28/17381  | 0.023903237 | 0.043468164 | 0.015401224 | 11065    | 1     |
| BP       | GO:1905508 | 'Protein localization to microtubule organizing center'   | 1/15       | 28/17381  | 0.023903237 | 0.043468164 | 0.015401224 | 6790     | 1     |
| BP       | GO:0030262 | 'Apoptotic nuclear changes'                               | 1/15       | 29/17381  | 0.024746979 | 0.04484293  | 0.015888318 | 7153     | 1     |
| BP       | GO:0016579 | 'Protein deubiquitination'                                | 2/15       | 291/17381 | 0.025405986 | 0.045874414 | 0.016253783 | 983/991  | 2     |
| BP       | GO:0040020 | 'Regulation of meiotic nuclear division'                  | 1/15       | 30/17381  | 0.02559004  | 0.046044051 | 0.016313888 | 991      | 1     |
| BP       | GO:0009205 | 'Purine ribonucleoside triphosphate metabolic process'    | 2/15       | 296/17381 | 0.026223002 | 0.046899191 | 0.016616873 | 891/983  | 2     |

Table SIII. Continued.

| Ontology | ID         | Description                                                                        | Gene ratio | BgRatio   | P-value                | Padjust                | q-value                | Gene ID                                  | Count |
|----------|------------|------------------------------------------------------------------------------------|------------|-----------|------------------------|------------------------|------------------------|------------------------------------------|-------|
| BP       | GO:0006921 | 'Cellular component disassembly involved in execution phase of apoptosis'          | 1/15       | 31/17381  | 0.026432421            | 0.046899191            | 0.016616873            | 7153                                     | 1     |
| BP       | GO:0008608 | 'Attachment of spindle microtubules to kinetochore'                                | 1/15       | 31/17381  | 0.026432421            | 0.046899191            | 0.016616873            | 891                                      | 1     |
| BP       | GO:0010458 | 'Exit from mitosis'                                                                | 1/15       | 31/17381  | 0.026432421            | 0.046899191            | 0.016616873            | 11065                                    | 1     |
| BP       | GO:0009199 | 'Ribonucleoside triphosphate metabolic process'                                    | 2/15       | 301/17381 | 0.027050804            | 0.047830314            | 0.016946779            | 891/983                                  | 2     |
| BP       | GO:0009144 | 'Purine nucleoside triphosphate metabolic process'                                 | 2/15       | 303/17381 | 0.027384923            | 0.048254124            | 0.017096939            | 891/983                                  | 2     |
| BP       | GO:0070646 | 'Protein modification by small protein removal'                                    | 2/15       | 306/17381 | 0.027889297            | 0.048973988            | 0.017351995            | 983/991                                  | 2     |
| BP       | GO:1901976 | 'Regulation of cell cycle checkpoint'                                              | 1/15       | 33/17381  | 0.028115144            | 0.049201501            | 0.017432605            | 891                                      | 1     |
| BP       | GO:0009167 | 'Purine ribonucleoside monophosphate metabolic process'                            | 2/15       | 310/17381 | 0.028567725            | 0.049485799            | 0.017533335            | 891/983                                  | 2     |
| BP       | GO:0048638 | 'Regulation of developmental growth'                                               | 2/15       | 310/17381 | 0.028567725            | 0.049485799            | 0.017533335            | 891/983                                  | 2     |
| BP       | GO:0009126 | 'Purine nucleoside monophosphate metabolic process'                                | 2/15       | 311/17381 | 0.028738386            | 0.049485799            | 0.017533335            | 891/983                                  | 2     |
| BP       | GO:0010039 | 'Response to iron ion'                                                             | 1/15       | 34/17381  | 0.028955487            | 0.049485799            | 0.017533335            | 891                                      | 1     |
| BP       | GO:0014037 | 'Schwann cell differentiation'                                                     | 1/15       | 34/17381  | 0.028955487            | 0.049485799            | 0.017533335            | 983                                      | 1     |
| BP       | GO:0045070 | 'Positive regulation of viral genome replication'                                  | 1/15       | 34/17381  | 0.028955487            | 0.049485799            | 0.017533335            | 7153                                     | 1     |
| BP       | GO:0045737 | 'Positive regulation of cyclin-dependent protein serine/threonine kinase activity' | 1/15       | 34/17381  | 0.028955487            | 0.049485799            | 0.017533335            | 891                                      | 1     |
| BP       | GO:0019058 | 'Viral life cycle'                                                                 | 2/15       | 313/17381 | 0.029080968            | 0.049534583            | 0.017550619            | 7153/983                                 | 2     |
| BP       | GO:0001701 | 'In utero embryonic development'                                                   | 2/15       | 315/17381 | 0.029425225            | 0.049954452            | 0.017699383            | 891/9133                                 | 2     |
| CC       | GO:0005819 | 'Spindle'                                                                          | 9/15       | 318/18511 | 5.32x10 <sup>-13</sup> | 2.66x10 <sup>-11</sup> | 6.72x10 <sup>-12</sup> | 1063/22974/332/6790/701/891/9055/983/991 | 9     |
| CC       | GO:0000793 | 'Condensed chromosome'                                                             | 7/15       | 216/18511 | 1.59x10 <sup>-10</sup> | 3.97x10 <sup>-9</sup>  | 1.00x10 <sup>-9</sup>  | 1063/11130/332/6790/701/7153/891         | 7     |
| CC       | GO:0000779 | 'Condensed chromosome, centromeric region'                                         | 6/15       | 116/18511 | 2.54x10 <sup>-10</sup> | 4.23x10 <sup>-9</sup>  | 1.07x10 <sup>-9</sup>  | 1063/11130/332/6790/701/891              | 6     |
| CC       | GO:0000922 | 'Spindle pole'                                                                     | 6/15       | 150/18511 | 1.21x10 <sup>-9</sup>  | 1.51x10 <sup>-8</sup>  | 3.81x10 <sup>-9</sup>  | 1063/22974/6790/891/9055/991             | 6     |
| CC       | GO:0098687 | 'Chromosomal region'                                                               | 7/15       | 352/18511 | 4.78x10 <sup>-9</sup>  | 4.31x10 <sup>-8</sup>  | 1.09x10 <sup>-8</sup>  | 1063/11130/332/6790/701/891/983          | 7     |
| CC       | GO:0000775 | 'Chromosome, centromeric region'                                                   | 6/15       | 191/18511 | 5.17x10 <sup>-9</sup>  | 4.31x10 <sup>-8</sup>  | 1.09x10 <sup>-8</sup>  | 1063/11130/332/6790/701/891              | 6     |

Table SIII. Continued.

| Ontology | ID         | Description                                                      | Gene ratio | BgRatio   | P-value               | Padjust               | q-value                | Gene ID                    | Count |
|----------|------------|------------------------------------------------------------------|------------|-----------|-----------------------|-----------------------|------------------------|----------------------------|-------|
| CC       | GO:0000777 | 'Condensed chromosome kinetochore'                               | 5/15       | 103/18511 | 1.39x10 <sup>-8</sup> | 9.92x10 <sup>-8</sup> | 2.51x10 <sup>-8</sup>  | 1063/11130/332/701/891     | 5     |
| CC       | GO:0000776 | 'Kinetochore'                                                    | 5/15       | 133/18511 | 5.03x10 <sup>-8</sup> | 3.15x10 <sup>-7</sup> | 7.95x10 <sup>-8</sup>  | 1063/11130/332/701/891     | 5     |
| CC       | GO:0000940 | 'Condensed chromosome outer kinetochore'                         | 3/15       | 12/18511  | 9.43x10 <sup>-8</sup> | 5.24x10 <sup>-7</sup> | 1.32x10 <sup>-7</sup>  | 1063/701/891               | 3     |
| CC       | GO:0030496 | 'Midbody'                                                        | 5/15       | 160/18511 | 1.27x10 <sup>-7</sup> | 6.34x10 <sup>-7</sup> | 1.60x10 <sup>-7</sup>  | 1063/332/6790/9055/983     | 5     |
| CC       | GO:0005680 | 'Anaphase-promoting complex'                                     | 3/15       | 21/18511  | 5.68x10 <sup>-7</sup> | 2.58x10 <sup>-6</sup> | 6.52x10 <sup>-7</sup>  | 11065/701/991              | 3     |
| CC       | GO:0000780 | 'Condensed nuclear chromosome, centromeric region'               | 3/15       | 22/18511  | 6.57x10 <sup>-7</sup> | 2.74x10 <sup>-6</sup> | 6.91x10 <sup>-7</sup>  | 6790/701/891               | 3     |
| CC       | GO:0005813 | 'Centrosome'                                                     | 6/15       | 469/18511 | 1.06x10 <sup>-6</sup> | 4.06x10 <sup>-6</sup> | 1.03x10 <sup>-6</sup>  | 1063/6790/891/9133/983/991 | 6     |
| CC       | GO:0000152 | 'Nuclear ubiquitin ligase complex'                               | 3/15       | 40/18511  | 4.18x10 <sup>-6</sup> | 1.49x10 <sup>-5</sup> | 3.77x10 <sup>-6</sup>  | 11065/701/991              | 3     |
| CC       | GO:0005876 | 'Spindle microtubule'                                            | 3/15       | 52/18511  | 9.29x10 <sup>-6</sup> | 3.10x10 <sup>-5</sup> | 7.82x10 <sup>-6</sup>  | 6790/9055/983              | 3     |
| CC       | GO:0005874 | 'Microtubule'                                                    | 5/15       | 393/18511 | 1.06x10 <sup>-5</sup> | 3.31x10 <sup>-5</sup> | 8.36x10 <sup>-6</sup>  | 22974/332/6790/9055/983    | 5     |
| CC       | GO:0000778 | 'Condensed nuclear chromosome kinetochore'                       | 2/15       | 11/18511  | 3.36x10 <sup>-5</sup> | 9.82x10 <sup>-5</sup> | 2.48x10 <sup>-5</sup>  | 701/891                    | 2     |
| CC       | GO:0072686 | 'Mitotic spindle'                                                | 3/15       | 81/18511  | 3.54x10 <sup>-5</sup> | 9.82x10 <sup>-5</sup> | 2.48x10 <sup>-5</sup>  | 22974/6790/983             | 3     |
| CC       | GO:0000794 | 'Condensed nuclear chromosome'                                   | 3/15       | 95/18511  | 5.70x10 <sup>-5</sup> | 0.000149934           | 3.79x10 <sup>-5</sup>  | 6790/701/891               | 3     |
| CC       | GO:0045120 | 'Pronucleus'                                                     | 2/15       | 15/18511  | 6.40x10 <sup>-5</sup> | 0.000159907           | 4.04x10 <sup>-5</sup>  | 1063/6790                  | 2     |
| CC       | GO:0051233 | 'Spindle midzone'                                                | 2/15       | 31/18511  | 0.00028115            | 0.000669406           | 0.000169113            | 6790/701                   | 2     |
| CC       | GO:0031461 | 'Cullin-RING ubiquitin ligase complex'                           | 3/15       | 177/18511 | 0.000359358           | 0.000816723           | 0.00020633             | 11065/701/991              | 3     |
| CC       | GO:0000307 | 'Cyclin-dependent protein kinase holoenzyme complex'             | 2/15       | 41/18511  | 0.000493477           | 0.001072776           | 0.000271017            | 891/983                    | 2     |
| CC       | GO:0000151 | 'Ubiquitin ligase complex'                                       | 3/15       | 297/18511 | 0.001612375           | 0.003359115           | 0.000848618            | 11065/701/991              | 3     |
| CC       | GO:1902554 | 'Serine/threonine protein kinase complex'                        | 2/15       | 85/18511  | 0.002104658           | 0.004209317           | 0.001063406            | 891/983                    | 2     |
| CC       | GO:1902911 | 'Protein kinase complex'                                         | 2/15       | 99/18511  | 0.0028412             | 0.005463846           | 0.00138034             | 891/983                    | 2     |
| CC       | GO:0005814 | 'Centriole'                                                      | 2/15       | 124/18511 | 0.004414613           | 0.00817521            | 0.002065316            | 6790/7153                  | 2     |
| CC       | GO:0005875 | 'Microtubule associated complex'                                 | 2/15       | 148/18511 | 0.006226953           | 0.01111956            | 0.002809152            | 332/6790                   | 2     |
| CC       | GO:0044450 | 'Microtubule organizing center part'                             | 2/15       | 166/18511 | 0.00773886            | 0.013025422           | 0.003290633            | 6790/7153                  | 2     |
| CC       | GO:0070938 | 'Contractile ring'                                               | 1/15       | 10/18511  | 0.008075761           | 0.013025422           | 0.003290633            | 9055                       | 1     |
| CC       | GO:0097539 | 'Ciliary transition fiber'                                       | 1/15       | 10/18511  | 0.008075761           | 0.013025422           | 0.003290633            | 1063                       | 1     |
| CC       | GO:0033267 | 'Axon part'                                                      | 2/15       | 181/18511 | 0.0091824             | 0.014347499           | 0.003624631            | 22974/6790                 | 2     |
| CC       | GO:0031616 | 'Spindle pole centrosome'                                        | 1/15       | 12/18511  | 0.009683592           | 0.014672109           | 0.003706638            | 6790                       | 1     |
| CC       | GO:0043073 | 'Germ cell nucleus'                                              | 1/15       | 19/18511  | 0.015291863           | 0.022488033           | 0.005681187            | 6790                       | 1     |
| CC       | GO:0061695 | 'Transferase complex, transferring phosphorus-containing groups' | 2/15       | 263/18511 | 0.018691956           | 0.026702794           | 0.006745969            | 891/983                    | 2     |
| CC       | GO:0097431 | 'Mitotic spindle pole'                                           | 1/15       | 25/18511  | 0.020075344           | 0.027882423           | 0.00704398             | 6790                       | 1     |
| MF       | GO:0035173 | 'Histone kinase activity'                                        | 3/15       | 17/17354  | 3.53x10 <sup>-7</sup> | 2.43x10 <sup>-5</sup> | 1.41x10 <sup>-05</sup> | 6790/891/983               | 3     |

Table SIII. Continued.

| A, GO functional enrichment |            |                                                             |            |           |                       |                       |                        |                            |       |
|-----------------------------|------------|-------------------------------------------------------------|------------|-----------|-----------------------|-----------------------|------------------------|----------------------------|-------|
| Ontology                    | ID         | Description                                                 | Gene ratio | BgRatio   | P-value               | Padjust               | q-value                | Gene ID                    | Count |
| MF                          | GO:0004693 | 'Cyclin-dependent protein serine/threonine kinase activity' | 3/15       | 30/17354  | 2.09x10 <sup>-6</sup> | 5.32x10 <sup>-5</sup> | 3.09x10 <sup>-05</sup> | 891/9133/983               | 3     |
| MF                          | GO:0097472 | 'Cyclin-dependent protein kinase activity'                  | 3/15       | 31/17354  | 2.31x10 <sup>-6</sup> | 5.32x10 <sup>-5</sup> | 3.09x10 <sup>-05</sup> | 891/9133/983               | 3     |
| MF                          | GO:0004674 | 'Protein serine/threonine kinase activity'                  | 5/15       | 450/17354 | 2.78x10 <sup>-5</sup> | 0.000479058           | 0.000277715            | 6790/701/891/9133/983      | 5     |
| MF                          | GO:0008022 | 'Protein C-terminus binding'                                | 3/15       | 180/17354 | 0.000455524           | 0.006286233           | 0.003644193            | 1063/7153/991              | 3     |
| MF                          | GO:0004869 | 'Cysteine-type endopeptidase inhibitor activity'            | 2/15       | 58/17354  | 0.001120919           | 0.012890571           | 0.007472795            | 332/9232                   | 2     |
| MF                          | GO:0044389 | 'Ubiquitin-like protein ligase binding'                     | 3/15       | 313/17354 | 0.002251022           | 0.022188648           | 0.012862984            | 11065/6790/891             | 3     |
| MF                          | GO:0042826 | 'Histone deacetylase binding'                               | 2/15       | 108/17354 | 0.003821624           | 0.032961508           | 0.019108121            | 7153/991                   | 2     |
| B, KEGG pathway enrichment  |            |                                                             |            |           |                       |                       |                        |                            |       |
| Ontology                    | ID         | Description                                                 | Gene ratio | BgRatio   | P-value               | Padjust               | q-value                | Gene ID                    | Count |
| MF                          | GO:0042826 | 'Histone deacetylase binding'                               | 2/15       | 108/17354 | 0.003821624           | 0.032961508           | 0.019108121            | 7153/991                   | 2     |
| N/A                         | hsa04110   | 'Cell cycle'                                                | 6/10       | 124/7440  | 3.78x10 <sup>-9</sup> | 3.59x10 <sup>-8</sup> | 1.39x10 <sup>-08</sup> | 701/891/9133/9232/983/991  | 6     |
| N/A                         | hsa04114   | 'Oocyte meiosis'                                            | 6/10       | 124/7440  | 3.78x10 <sup>-9</sup> | 3.59x10 <sup>-8</sup> | 1.39x10 <sup>-08</sup> | 6790/891/9133/9232/983/991 | 6     |
| N/A                         | hsa04914   | 'Progesterone-mediated oocyte maturation'                   | 4/10       | 99/7440   | 5.83x10 <sup>-6</sup> | 3.69x10 <sup>-5</sup> | 1.43x10 <sup>-05</sup> | 6790/891/9133/983          | 4     |
| N/A                         | hsa04115   | 'p53 signaling pathway'                                     | 3/10       | 72/7440   | 9.93x10 <sup>-5</sup> | 0.000471862           | 0.000182994            | 891/9133/983               | 3     |
| N/A                         | hsa05166   | 'Human T-cell leukemia virus 1 infection'                   | 4/10       | 255/7440  | 0.000240453           | 0.000913722           | 0.000354352            | 701/9133/9232/991          | 4     |
| N/A                         | hsa04218   | 'Cellular senescence'                                       | 3/10       | 160/7440  | 0.001048181           | 0.003319238           | 0.001287239            | 891/9133/983               | 3     |
| N/A                         | hsa05170   | 'Human immunodeficiency virus 1 infection'                  | 3/10       | 212/7440  | 0.002360359           | 0.006406689           | 0.002484589            | 891/9133/983               | 3     |
| N/A                         | hsa01524   | 'Platinum drug resistance'                                  | 2/10       | 73/7440   | 0.004061202           | 0.009645356           | 0.003740581            | 332/7153                   | 2     |
| N/A                         | hsa04068   | 'FoxO signaling pathway'                                    | 2/10       | 132/7440  | 0.012807013           | 0.026124999           | 0.010131579            | 891/9133                   | 2     |
| N/A                         | hsa04120   | 'Ubiquitin mediated proteolysis'                            | 2/10       | 137/7440  | 0.01375               | 0.026124999           | 0.010131579            | 11065/991                  | 2     |
| N/A                         | hsa05203   | 'Viral carcinogenesis'                                      | 2/10       | 201/7440  | 0.028333822           | 0.048940238           | 0.018979594            | 983/991                    | 2     |
